# Supplementary material for: Lipidosterolic Extract of Serenoa Repens Modulates the Expression of Inflammation Related-Genes in Benign Prostatic Hyperplasia Epithelial and Stromal Cells
Source: MDPI journal article supplement (doi:10.3390/ijms140714301), 2013-07-10
Supplement: s2 [file s2]

## Sheet: Table S1 inventory
Supplementary Information
Table S1:	Supplementary Table 1
Table S1a:	differentially expressed genes in the different time points in BPH1 cells
Table S1b:	differentially expressed genes in the different time points in PrSF cells
Table S1c:	differentially expressed genes in common between BPH1 and PrSF cells in the different time points
Table S1d:	GO biological processes differentially regulated in the different time points in BPH1 cells
Table S1e:	GO biological processes differentially regulated in the different time points in PrSF cells
Table S1f:	differentially expressed genes related to proliferation in the different time points in BPH1 cells
Table S1g:	differentially expressed genes related to apoptosis in the different time points in BPH1 cells
Table S1h:	differentially expressed genes related to proliferation in the different time points in PrSF cells
Table S1i:	differentially expressed genes related to apoptosis in the different time points in PrSF cells
Table S1j:	differentially expressed genes related to inflammation in the different time points in BPH1 cells
Table S1k:	differentially expressed genes related to inflammation in the different time points in PrSF cells

## Sheet:  Table S1a 
Table S1a. Differentially expressed genes in the different time points in BPH1 cells.
ID	LOCUS	SYMBOL	Descr	F.p.value.adj	1h.0h	3h.h0	6h.0h
1552485_at	15q22.1	LACTB	lactamase, beta	7.50005e-05	0	0	downregulated
1552486_s_at	15q22.1	LACTB	lactamase, beta	0.00292512	0	0	downregulated
1552487_a_at	15q25.2	BNC1	basonuclin 1	2.06732e-05	0	downregulated	downregulated
1552502_s_at	1p34.3	RHBDL2	rhomboid, veinlet-like 2 (Drosophila)	0.00253574	0	0	downregulated
1552611_a_at	1p32.3-p31.3	JAK1	Janus kinase 1 (a protein tyrosine kinase)	0.0122923	upregulated	upregulated	upregulated
1552678_a_at	11q23	USP28	ubiquitin specific peptidase 28	0.0144092	0	downregulated	downregulated
1552689_at	16p13.3	CASKIN1	CASK interacting protein 1	0.00206909	downregulated	downregulated	downregulated
1552797_s_at	2q11.1	PROM2	prominin 2	0.000112976	downregulated	downregulated	downregulated
1552972_at	NA	NA	NA	0.00277276	0	0	downregulated
1553031_at	6p12.3	GPR115	G protein-coupled receptor 115	0.000172171	downregulated	downregulated	downregulated
1553107_s_at	5q31.1	DDX46	DEAD (Asp-Glu-Ala-Asp) box polypeptide 46	6.12046e-05	upregulated	upregulated	upregulated
1553111_a_at	13q14.11	KBTBD6	kelch repeat and BTB (POZ) domain containing 6	0.0415871	0	0	upregulated
1553117_a_at	6p21	STK38	serine/threonine kinase 38	0.000234234	downregulated	downregulated	downregulated
1553185_at	9q21.32	RASEF	RAS and EF-hand domain containing	0.015211	0	upregulated	upregulated
1553186_x_at	9q21.32	RASEF	RAS and EF-hand domain containing	0.0456201	0	0	upregulated
1553349_at	12q12	ARID2	AT rich interactive domain 2 (ARID, RFX-like)	0.0331502	0	0	upregulated
1553535_a_at	22q13	RANGAP1	Ran GTPase activating protein 1	0.000587594	0	upregulated	upregulated
1553575_at	NA	ND6	NADH dehydrogenase, subunit 6 (complex I)	0.00086314	0	0	upregulated
1553708_at	7p12.3	MGC16075	hypothetical protein MGC16075	5.30884e-07	0	downregulated	downregulated
1553960_at	20q13.12	SNX21	sorting nexin family member 21	0.0005556	downregulated	downregulated	downregulated
1553994_at	6q14-q21	NT5E	5'-nucleotidase, ecto (CD73)	5.56459e-06	0	downregulated	downregulated
1553995_a_at	6q14-q21	NT5E	5'-nucleotidase, ecto (CD73)	2.63116e-05	0	0	downregulated
1554062_at	Xp22.33	XG	Xg blood group	5.48088e-06	0	downregulated	downregulated
1554089_s_at	7q11.23	SBDSP	Shwachman-Bodian-Diamond syndrome pseudogene	0.000184806	0	upregulated	upregulated
1554171_at	Xq13.1	ZMYM3	zinc finger, MYM-type 3	0.000458255	0	downregulated	downregulated
1554283_at	4q31.1	CCRN4L	CCR4 carbon catabolite repression 4-like (S. cerevisiae)	0.0024663	0	downregulated	downregulated
1554321_a_at	20q11.22	NFS1	NFS1 nitrogen fixation 1 homolog (S. cerevisiae)	0.00295593	0	0	upregulated
1554408_a_at	17q23.2-q25.3	TK1	thymidine kinase 1, soluble	0.00133545	upregulated	upregulated	upregulated
1554417_s_at	1p36.13-q31.3	APH1A	anterior pharynx defective 1 homolog A (C. elegans)	0.0195519	0	upregulated	upregulated
1554452_a_at	7q32.1	HIG2	hypoxia-inducible protein 2	0.00586928	0	upregulated	upregulated
1554466_a_at	16p13.3	C16orf13	chromosome 16 open reading frame 13	0.0175469	0	0	upregulated
1554544_a_at	18q23	MBP	myelin basic protein	0.000823327	upregulated	0	0
1554574_a_at	22q13.2-q13.31	CYB5R3	cytochrome b5 reductase 3	0.0331318	0	upregulated	0
1554577_a_at	Xq22.3	PSMD10	proteasome (prosome, macropain) 26S subunit, non-ATPase, 10	0.000376237	upregulated	upregulated	upregulated
1554588_a_at	2q31.2	TTC30B	tetratricopeptide repeat domain 30B	0.000526301	0	upregulated	upregulated
1554608_at	2p11.2	TGOLN2	trans-golgi network protein 2	0.00264809	downregulated	downregulated	0
1554761_a_at	7p22.3	HEATR2	HEAT repeat containing 2	0.00610694	0	upregulated	0
1554767_s_at	21q21.3	CRYZL1	crystallin, zeta (quinone reductase)-like 1	0.0257744	upregulated	upregulated	upregulated
1554768_a_at	4q27	MAD2L1	MAD2 mitotic arrest deficient-like 1 (yeast)	0.00220752	0	0	upregulated
1554774_at	3q11.2	MINA	MYC induced nuclear antigen	0.00360988	0	upregulated	0
1554887_at	NA	NA	NA	2.67244e-06	0	upregulated	0
1554966_a_at	3q12.1	FILIP1L	filamin A interacting protein 1-like	0.000387287	0	downregulated	downregulated
1554980_a_at	1q32.3	ATF3	activating transcription factor 3	0.0180997	0	0	upregulated
1554997_a_at	1q25.2-q25.3	PTGS2	prostaglandin-endoperoxide synthase 2 (prostaglandin G/H synthase and cyclooxygenase)	0.0251228	0	0	downregulated
1555137_a_at	12q22	FGD6	FYVE, RhoGEF and PH domain containing 6	0.0107344	0	0	downregulated
1555167_s_at	7q22.2	NAMPT	nicotinamide phosphoribosyltransferase	0.00268465	0	0	downregulated
1555201_a_at	6q25.1	RMND1	required for meiotic nuclear division 1 homolog (S. cerevisiae)	0.00121598	upregulated	upregulated	upregulated
1555226_s_at	1q21.2	C1orf43	chromosome 1 open reading frame 43	0.000922636	upregulated	upregulated	upregulated
1555240_s_at	1p31.3	GNG12	guanine nucleotide binding protein (G protein), gamma 12	0.000166555	upregulated	upregulated	upregulated
1555272_at	7p22.1	RSPH10B2	radial spoke head 10 homolog B2 (Chlamydomonas)	0.0129786	downregulated	downregulated	downregulated
1555355_a_at	11q23.3	ETS1	v-ets erythroblastosis virus E26 oncogene homolog 1 (avian)	5.10257e-07	0	0	downregulated
1555420_a_at	2q32	KLF7	Kruppel-like factor 7 (ubiquitous)	0.000143537	0	downregulated	downregulated
1555446_s_at	21q22.3	TRAPPC10	trafficking protein particle complex 10	0.0180403	0	0	upregulated
1555565_s_at	6p21.3	TAPBP	TAP binding protein (tapasin)	0.0163038	0	upregulated	upregulated
1555673_at	17q12-q21	KRTAP2-1	keratin associated protein 2-1	8.43047e-09	0	downregulated	downregulated
1555724_s_at	11q23.2	TAGLN	transgelin	8.9086e-06	0	0	upregulated
1555730_a_at	11q13	CFL1	cofilin 1 (non-muscle)	0.0130387	0	upregulated	upregulated
1555751_a_at	19q13.32	GEMIN7	gem (nuclear organelle) associated protein 7	0.00953468	0	upregulated	upregulated
1555789_s_at	17p13.1	PHF23	PHD finger protein 23	0.000869861	0	upregulated	upregulated
1555797_a_at	1q25.3	ARPC5	actin related protein 2/3 complex, subunit 5, 16kDa	0.00864065	0	upregulated	0
1555812_a_at	12p12.3	ARHGDIB	Rho GDP dissociation inhibitor (GDI) beta	0.00324155	upregulated	upregulated	upregulated
1555814_a_at	3p21.3	RHOA	ras homolog gene family, member A	0.00271721	0	upregulated	upregulated
1555831_s_at	1p33	LRRC41	leucine rich repeat containing 41	0.0347561	0	0	upregulated
1555852_at	6p21.3	PSMB9	proteasome (prosome, macropain) subunit, beta type, 9 (large multifunctional peptidase 2)	2.38996e-07	0	downregulated	0
1555870_at	1p36.31	RNF207	ring finger protein 207	4.98782e-05	0	downregulated	downregulated
1555878_at	10q22-q23	RPS24	ribosomal protein S24	0.000136603	downregulated	0	downregulated
1555894_s_at	16q22.1	MTSS1L	metastasis suppressor 1-like	0.00442828	0	downregulated	downregulated
1555897_at	1p36.12	AOF2	amine oxidase (flavin containing) domain 2	0.00275141	0	downregulated	downregulated
1555905_a_at	3p21.33-p21.32	C3orf23	chromosome 3 open reading frame 23	0.00205932	downregulated	downregulated	downregulated
1555920_at	7p15.2	CBX3	chromobox homolog 3 (HP1 gamma homolog, Drosophila)	0.00189451	upregulated	upregulated	upregulated
1555976_s_at	18p11.31	MYL12A	myosin, light chain 12A, regulatory, non-sarcomeric	3.64772e-06	0	downregulated	0
1556123_a_at	NA	NA	NA	0.0158987	0	upregulated	upregulated
1556316_s_at	22q11.23	LOC284889	hypothetical protein LOC284889	0.00791028	0	0	downregulated
1556429_a_at	8q24.13	WDR67	WD repeat domain 67	0.00462332	0	0	downregulated
1556499_s_at	17q21.33	COL1A1	collagen, type I, alpha 1	0.00383226	downregulated	downregulated	0
1556704_s_at	9q12	LOC286297	hypothetical protein LOC286297	1.34582e-06	upregulated	upregulated	upregulated
1556818_at	NA	NA	NA	0.0188415	0	0	upregulated
1557067_s_at	16p13.3	LUC7L	LUC7-like (S. cerevisiae)	8.68406e-05	0	upregulated	upregulated
1557078_at	17q12	SLFN5	schlafen family member 5	7.40755e-05	0	downregulated	downregulated
1557240_a_at	NA	NA	NA	0.000222755	0	upregulated	upregulated
1557270_at	NA	NA	NA	0.00136278	0	0	upregulated
1557293_at	3q29	LOC440993	hypothetical gene supported by AK128346	9.06359e-05	downregulated	downregulated	0
1557331_at	2q13	POLR1B	polymerase (RNA) I polypeptide B, 128kDa	0.0165919	0	upregulated	0
1557385_at	2p15	FAM161A	family with sequence similarity 161, member A	0.0358973	0	0	upregulated
1557521_a_at	NA	NA	NA	0.00256366	0	downregulated	downregulated
1557522_x_at	NA	NA	NA	0.000925149	0	downregulated	downregulated
1557779_at	NA	NA	NA	0.000221345	0	0	downregulated
1557910_at	6p12	HSP90AB1	heat shock protein 90kDa alpha (cytosolic), class B member 1	0.000858647	upregulated	upregulated	upregulated
1557938_s_at	17q21.31	PTRF	polymerase I and transcript release factor	0.00352325	0	upregulated	upregulated
1557948_at	19q13.31	PHLDB3	pleckstrin homology-like domain, family B, member 3	0.000614118	0	downregulated	0
1558028_x_at	NA	NA	NA	0.00353381	upregulated	upregulated	upregulated
1558142_at	22q13.1	TNRC6B	trinucleotide repeat containing 6B	0.000645555	0	downregulated	upregulated
1558164_s_at	2p14-p16	PEX13	peroxisomal biogenesis factor 13	0.000944936	0	downregulated	0
1558215_s_at	17q21.3	UBTF	upstream binding transcription factor, RNA polymerase I	0.033301	0	upregulated	0
1558251_a_at	19q13.43	ZNF587	zinc finger protein 587	0.00489931	upregulated	upregulated	upregulated
1558292_s_at	17q12	PIGW	phosphatidylinositol glycan anchor biosynthesis, class W	2.10037e-05	0	upregulated	0
1558507_at	1q31.3	C1orf53	chromosome 1 open reading frame 53	0.00790078	0	upregulated	upregulated
1558687_a_at	NA	NA	NA	7.32611e-06	0	upregulated	upregulated
1558794_at	10q23.2	LOC728190	hypothetical LOC728190	0.000539428	downregulated	downregulated	downregulated
1558822_at	NA	NA	NA	0.0203122	0	upregulated	upregulated
1559096_x_at	6p12.3-p11.2	FBXO9	F-box protein 9	0.00104819	0	upregulated	upregulated
1559425_at	NA	NA	NA	0.0291961	0	0	upregulated
1559477_s_at	2p14-p13	MEIS1	Meis homeobox 1	0.0022709	0	0	upregulated
1560137_at	NA	NA	NA	0.0138801	0	0	upregulated
1560318_at	1p22.1	ARHGAP29	Rho GTPase activating protein 29	0.00898889	upregulated	0	0
1561418_at	NA	NA	NA	0.000487305	0	0	downregulated
1562415_a_at	1p35.2	SPOCD1	SPOC domain containing 1	0.0184495	0	0	downregulated
1562848_at	NA	NA	NA	1.30987e-05	0	downregulated	0
1563469_at	NA	NA	NA	0.000480257	0	0	upregulated
1563947_a_at	12p13.3	ERC1	ELKS/RAB6-interacting/CAST family member 1	0.00462994	upregulated	upregulated	upregulated
1564494_s_at	17q25	P4HB	prolyl 4-hydroxylase, beta polypeptide	0.00545223	0	upregulated	upregulated
1565149_at	11q21-q22.1	DYNC2H1	dynein, cytoplasmic 2, heavy chain 1	0.0183452	0	0	upregulated
1565717_s_at	16p11.2	FUS	fusion (involved in t(12;16) in malignant liposarcoma)	0.000178814	upregulated	upregulated	upregulated
1566557_at	17q25.3	FLJ90757	hypothetical LOC440465	0.00311382	0	downregulated	downregulated
1566558_x_at	17q25.3	FLJ90757	hypothetical LOC440465	6.25202e-07	0	downregulated	downregulated
1568592_at	15q21.1	TRIM69	tripartite motif-containing 69	8.56952e-06	0	downregulated	downregulated
1568618_a_at	18q12.1	GALNT1	UDP-N-acetyl-alpha-D-galactosamine:polypeptide N-acetylgalactosaminyltransferase 1 (GalNAc-T1)	0.00365268	upregulated	upregulated	upregulated
1568639_a_at	NA	NA	NA	3.90751e-05	0	downregulated	downregulated
1569302_at	11q21	KIAA1731	KIAA1731	0.00024555	upregulated	upregulated	upregulated
1569583_at	4q13.3	EREG	epiregulin	0.00604218	upregulated	0	0
1569607_s_at	NA	LOC643187	hypothetical LOC643187	0.045234	0	0	upregulated
1569906_s_at	20q11.22-q11.23	PHF20	PHD finger protein 20	0.00141078	upregulated	upregulated	0
200598_s_at	12q24.2-q24.3	HSP90B1	heat shock protein 90kDa beta (Grp94), member 1	0.00242774	upregulated	upregulated	upregulated
200622_x_at	19q13.2-q13.3	CALM3	calmodulin 3 (phosphorylase kinase, delta)	0.000345169	upregulated	upregulated	upregulated
200628_s_at	14q32.31	WARS	tryptophanyl-tRNA synthetase	0.000145829	0	upregulated	upregulated
200632_s_at	8q24.3	NDRG1	N-myc downstream regulated 1	4.44194e-05	0	0	downregulated
200634_at	17p13.3	PFN1	profilin 1	0.0372647	0	upregulated	upregulated
200635_s_at	1p34	PTPRF	protein tyrosine phosphatase, receptor type, F	0.00287312	upregulated	upregulated	upregulated
200656_s_at	17q25	P4HB	prolyl 4-hydroxylase, beta polypeptide	0.0312841	0	upregulated	upregulated
200658_s_at	17q21	PHB	prohibitin	0.000262475	0	0	upregulated
200702_s_at	14q32	DDX24	DEAD (Asp-Glu-Ala-Asp) box polypeptide 24	0.0132228	upregulated	upregulated	upregulated
200710_at	17p13-p11	ACADVL	acyl-Coenzyme A dehydrogenase, very long chain	0.000258457	0	upregulated	upregulated
200751_s_at	14q11.2	HNRNPC	heterogeneous nuclear ribonucleoprotein C (C1/C2)	0.000589273	upregulated	upregulated	upregulated
200761_s_at	3p14	ARL6IP5	ADP-ribosylation-like factor 6 interacting protein 5	0.000233718	0	downregulated	downregulated
200787_s_at	1q21.1	PEA15	phosphoprotein enriched in astrocytes 15	0.0149552	0	upregulated	upregulated
200789_at	19q13.1	ECH1	enoyl Coenzyme A hydratase 1, peroxisomal	0.000599659	0	0	upregulated
200800_s_at	6p21.3	HSPA1A	heat shock 70kDa protein 1A	3.43819e-06	downregulated	upregulated	upregulated
200825_s_at	11q23.1-q23.3	HYOU1	hypoxia up-regulated 1	0.00342432	0	0	upregulated
200841_s_at	1q41-q42	EPRS	glutamyl-prolyl-tRNA synthetase	0.00122575	upregulated	upregulated	0
200842_s_at	1q41-q42	EPRS	glutamyl-prolyl-tRNA synthetase	0.00136425	upregulated	upregulated	upregulated
200846_s_at	11q13	PPP1CA	protein phosphatase 1, catalytic subunit, alpha isoform	0.00787514	0	upregulated	upregulated
200864_s_at	15q21.3-q22.31	RAB11A	RAB11A, member RAS oncogene family	0.00180375	0	downregulated	downregulated
200874_s_at	20p13	NOP56	NOP56 ribonucleoprotein homolog (yeast)	2.52949e-05	0	upregulated	upregulated
200885_at	1p13.2	PPM1J	protein phosphatase 1J (PP2C domain containing)	0.0216339	0	upregulated	upregulated
200887_s_at	2q32.2	STAT1	signal transducer and activator of transcription 1, 91kDa	9.32649e-06	0	downregulated	downregulated
200897_s_at	4q32.3	PALLD	palladin, cytoskeletal associated protein	8.26462e-05	downregulated	downregulated	downregulated
200899_s_at	10q24.1-q24.3	MGEA5	meningioma expressed antigen 5 (hyaluronidase)	0.00103019	0	downregulated	0
200907_s_at	4q32.3	PALLD	palladin, cytoskeletal associated protein	4.86669e-05	downregulated	downregulated	downregulated
200914_x_at	14q22.1	KTN1	kinectin 1 (kinesin receptor)	0.00534178	upregulated	upregulated	upregulated
200920_s_at	12q22	BTG1	B-cell translocation gene 1, anti-proliferative	0.00402655	0	0	upregulated
200928_s_at	9q32-q34.11	RAB14	RAB14, member RAS oncogene family	0.0034501	downregulated	downregulated	downregulated
200974_at	10q23.3	ACTA2	actin, alpha 2, smooth muscle, aorta	0.000627411	0	downregulated	0
201009_s_at	1q21.1	TXNIP	thioredoxin interacting protein	2.36847e-07	0	upregulated	0
201010_s_at	1q21.1	TXNIP	thioredoxin interacting protein	1.49489e-10	downregulated	upregulated	upregulated
201028_s_at	Xp22.32	CD99	CD99 molecule	0.0357203	0	upregulated	upregulated
201044_x_at	5q34	DUSP1	dual specificity phosphatase 1	0.0420793	0	upregulated	upregulated
201070_x_at	2q33.1	SF3B1	splicing factor 3b, subunit 1, 155kDa	0.0255624	upregulated	0	0
201116_s_at	4q32.3	CPE	carboxypeptidase E	8.22078e-07	downregulated	0	0
201117_s_at	4q32.3	CPE	carboxypeptidase E	8.43047e-09	downregulated	0	0
201120_s_at	Xq22-q24	PGRMC1	progesterone receptor membrane component 1	0.0175888	0	0	upregulated
201122_x_at	17p13-p12	EIF5A	eukaryotic translation initiation factor 5A	0.00295593	upregulated	upregulated	upregulated
201123_s_at	17p13-p12	EIF5A	eukaryotic translation initiation factor 5A	0.000355538	upregulated	upregulated	upregulated
201149_s_at	22q12.1-q13.2	TIMP3	TIMP metallopeptidase inhibitor 3	0.0308477	0	upregulated	0
201167_x_at	17q25.3	ARHGDIA	Rho GDP dissociation inhibitor (GDI) alpha	0.00271721	0	upregulated	upregulated
201170_s_at	3p26	BHLHE40	basic helix-loop-helix family, member e40	0.00105499	0	downregulated	downregulated
201182_s_at	12p13	CHD4	chromodomain helicase DNA binding protein 4	0.0140658	upregulated	upregulated	upregulated
201183_s_at	12p13	CHD4	chromodomain helicase DNA binding protein 4	0.0267756	upregulated	upregulated	0
201194_at	19q13.3	SEPW1	selenoprotein W, 1	0.0162692	0	upregulated	upregulated
201236_s_at	1q32	BTG2	BTG family, member 2	8.56952e-06	0	upregulated	upregulated
201252_at	19q13.11-q13.13	PSMC4	proteasome (prosome, macropain) 26S subunit, ATPase, 4	0.00444722	0	upregulated	upregulated
201267_s_at	11p12-p13	PSMC3	proteasome (prosome, macropain) 26S subunit, ATPase, 3	0.0175715	0	0	upregulated
201281_at	20q13.33	ADRM1	adhesion regulating molecule 1	0.0110106	0	upregulated	upregulated
201291_s_at	17q21-q22	TOP2A	topoisomerase (DNA) II alpha 170kDa	0.00174683	upregulated	upregulated	upregulated
201302_at	2p13	ANXA4	annexin A4	1.62246e-05	0	0	downregulated
201310_s_at	5q22.1	C5orf13	chromosome 5 open reading frame 13	7.04229e-05	0	downregulated	0
201313_at	12p13	ENO2	enolase 2 (gamma, neuronal)	0.00545833	0	downregulated	downregulated
201340_s_at	5q12-q13.3	ENC1	ectodermal-neural cortex (with BTB-like domain)	0.0157947	upregulated	0	0
201341_at	5q12-q13.3	ENC1	ectodermal-neural cortex (with BTB-like domain)	8.68406e-05	0	downregulated	downregulated
201368_at	2p22.3-p21	ZFP36L2	zinc finger protein 36, C3H type-like 2	0.000114829	downregulated	downregulated	downregulated
201384_s_at	17q21.31	NBR1	neighbor of BRCA1 gene 1	8.02602e-05	0	downregulated	downregulated
201420_s_at	1p13.2	WDR77	WD repeat domain 77	0.00163486	0	upregulated	upregulated
201465_s_at	1p32-p31	JUN	jun oncogene	0.00965248	0	0	upregulated
201466_s_at	1p32-p31	JUN	jun oncogene	3.79765e-05	0	0	upregulated
201475_x_at	12q13.2	MARS	methionyl-tRNA synthetase	8.46486e-05	0	upregulated	upregulated
201490_s_at	10q22-q23	PPIF	peptidylprolyl isomerase F	4.9079e-06	0	upregulated	upregulated
201502_s_at	14q13	NFKBIA	nuclear factor of kappa light polypeptide gene enhancer in B-cells inhibitor, alpha	0.00256903	0	upregulated	upregulated
201516_at	1p36-p22	SRM	spermidine synthase	0.000309075	0	0	upregulated
201531_at	19q13.1	ZFP36	zinc finger protein 36, C3H type, homolog (mouse)	0.000335891	0	0	upregulated
201532_at	14q23	PSMA3	proteasome (prosome, macropain) subunit, alpha type, 3	1.61392e-05	upregulated	upregulated	upregulated
201549_x_at	1q32.1	JARID1B	jumonji, AT rich interactive domain 1B	4.59663e-07	0	downregulated	0
201566_x_at	2p25	ID2	inhibitor of DNA binding 2, dominant negative helix-loop-helix protein	0.000298893	downregulated	downregulated	downregulated
201577_at	17q21.3	NME1	non-metastatic cells 1, protein (NM23A) expressed in	3.08112e-05	0	upregulated	upregulated
201593_s_at	2q32.1	ZC3H15	zinc finger CCCH-type containing 15	4.25182e-05	upregulated	upregulated	upregulated
201606_s_at	12q23.3	PWP1	PWP1 homolog (S. cerevisiae)	4.34243e-05	upregulated	upregulated	upregulated
201615_x_at	7q33	CALD1	caldesmon 1	0.000809467	upregulated	upregulated	upregulated
201626_at	7q36	INSIG1	insulin induced gene 1	1.80499e-05	downregulated	downregulated	downregulated
201627_s_at	7q36	INSIG1	insulin induced gene 1	4.22585e-05	0	downregulated	downregulated
201629_s_at	2p25	ACP1	acid phosphatase 1, soluble	0.0129891	upregulated	0	0
201683_x_at	14q11.2	TOX4	TOX high mobility group box family member 4	0.0283706	upregulated	upregulated	0
201692_at	9p13.3	SIGMAR1	sigma non-opioid intracellular receptor 1	0.0139563	0	upregulated	0
201693_s_at	5q31.1	EGR1	early growth response 1	3.13902e-05	0	upregulated	upregulated
201694_s_at	5q31.1	EGR1	early growth response 1	2.32387e-05	0	0	upregulated
201772_at	8q22.3	AZIN1	antizyme inhibitor 1	0.0016069	0	0	downregulated
201821_s_at	1q32.1	TIMM17A	translocase of inner mitochondrial membrane 17 homolog A (yeast)	1.02439e-06	0	upregulated	upregulated
201860_s_at	8p12	PLAT	plasminogen activator, tissue	0.000298699	0	0	downregulated
201879_at	15q24	ARIH1	ariadne homolog, ubiquitin-conjugating enzyme E2 binding protein, 1 (Drosophila)	0.0299966	0	0	downregulated
201914_s_at	6q21	SEC63	SEC63 homolog (S. cerevisiae)	0.00590585	upregulated	upregulated	upregulated
201920_at	2q11-q14	SLC20A1	solute carrier family 20 (phosphate transporter), member 1	0.000219904	0	0	downregulated
201946_s_at	12q15	CCT2	chaperonin containing TCP1, subunit 2 (beta)	0.000160107	0	upregulated	upregulated
201950_x_at	1p36.1	CAPZB	capping protein (actin filament) muscle Z-line, beta	0.0134924	0	upregulated	upregulated
201979_s_at	19q13.3	PPP5C	protein phosphatase 5, catalytic subunit	0.00741988	0	upregulated	upregulated
201988_s_at	12p13	CREBL2	cAMP responsive element binding protein-like 2	0.00875408	0	downregulated	downregulated
202003_s_at	18q21.1	ACAA2	acetyl-Coenzyme A acyltransferase 2	1.04317e-06	0	upregulated	upregulated
202007_at	1q43	NID1	nidogen 1	0.00665985	downregulated	0	0
202023_at	1q21-q22	EFNA1	ephrin-A1	2.13695e-05	downregulated	upregulated	upregulated
202068_s_at	19p13.3	LDLR	low density lipoprotein receptor	0.000153303	0	0	downregulated
202073_at	10p13	OPTN	optineurin	0.00223427	0	downregulated	downregulated
202081_at	19p13.13	IER2	immediate early response 2	1.78002e-05	0	upregulated	upregulated
202131_s_at	18q11.2	RIOK3	RIO kinase 3 (yeast)	0.000877958	0	0	downregulated
202138_x_at	7p22	JTV1	JTV1 gene	1.92473e-05	0	upregulated	0
202149_at	6p25-p24	NEDD9	neural precursor cell expressed, developmentally down-regulated 9	3.23912e-05	0	downregulated	downregulated
202237_at	11q23.1	NNMT	nicotinamide N-methyltransferase	1.19771e-05	0	0	downregulated
202238_s_at	11q23.1	NNMT	nicotinamide N-methyltransferase	3.68464e-05	0	0	downregulated
202289_s_at	10q26	TACC2	transforming, acidic coiled-coil containing protein 2	1.60101e-05	downregulated	downregulated	downregulated
202290_at	7q22.1	PDAP1	PDGFA associated protein 1	0.00287169	upregulated	upregulated	upregulated
202323_s_at	1q42.12	ACBD3	acyl-Coenzyme A binding domain containing 3	0.00090693	upregulated	upregulated	upregulated
202340_x_at	12q13	NR4A1	nuclear receptor subfamily 4, group A, member 1	0.00311382	0	upregulated	upregulated
202354_s_at	19p13.3	GTF2F1	general transcription factor IIF, polypeptide 1, 74kDa	0.0428269	0	0	upregulated
202364_at	10q24-q25	MXI1	MAX interactor 1	4.59663e-07	0	downregulated	downregulated
202397_at	16q22.1	NUTF2	nuclear transport factor 2	0.00579367	upregulated	upregulated	upregulated
202412_s_at	1p31.3	USP1	ubiquitin specific peptidase 1	0.00343417	upregulated	upregulated	upregulated
202435_s_at	2p21	CYP1B1	cytochrome P450, family 1, subfamily B, polypeptide 1	0.000117873	upregulated	upregulated	0
202436_s_at	2p21	CYP1B1	cytochrome P450, family 1, subfamily B, polypeptide 1	0.000133537	upregulated	upregulated	0
202437_s_at	2p21	CYP1B1	cytochrome P450, family 1, subfamily B, polypeptide 1	5.30128e-05	upregulated	upregulated	0
202440_s_at	11p15	ST5	suppression of tumorigenicity 5	0.0251228	0	downregulated	0
202461_at	14q24.3	EIF2B2	eukaryotic translation initiation factor 2B, subunit 2 beta, 39kDa	0.00174068	0	upregulated	0
202464_s_at	10p14-p15	PFKFB3	6-phosphofructo-2-kinase/fructose-2,6-biphosphatase 3	1.76447e-06	0	downregulated	downregulated
202481_at	1p36.1	DHRS3	dehydrogenase/reductase (SDR family) member 3	0.000281582	0	0	downregulated
202581_at	6p21.3	HSPA1B	heat shock 70kDa protein 1B	0.00012791	downregulated	upregulated	0
202625_at	8q13	LYN	v-yes-1 Yamaguchi sarcoma viral related oncogene homolog	5.19812e-05	0	downregulated	downregulated
202626_s_at	8q13	LYN	v-yes-1 Yamaguchi sarcoma viral related oncogene homolog	9.09254e-05	0	downregulated	downregulated
202671_s_at	21q22.3	PDXK	pyridoxal (pyridoxine, vitamin B6) kinase	0.00194573	upregulated	upregulated	upregulated
202675_at	1p36.1-p35	SDHB	succinate dehydrogenase complex, subunit B, iron sulfur (Ip)	0.000359817	upregulated	upregulated	0
202687_s_at	3q26	TNFSF10	tumor necrosis factor (ligand) superfamily, member 10	4.6835e-06	0	0	upregulated
202730_s_at	10q24	PDCD4	programmed cell death 4 (neoplastic transformation inhibitor)	0.000198206	downregulated	downregulated	downregulated
202731_at	10q24	PDCD4	programmed cell death 4 (neoplastic transformation inhibitor)	0.000414884	downregulated	downregulated	downregulated
202734_at	19p13.3	TRIP10	thyroid hormone receptor interactor 10	0.00771339	0	downregulated	downregulated
202740_at	3p21.1	ACY1	aminoacylase 1	0.0363227	0	upregulated	0
202744_at	8p12-p11	SLC20A2	solute carrier family 20 (phosphate transporter), member 2	0.000102035	0	0	downregulated
202748_at	1p22.2	GBP2	guanylate binding protein 2, interferon-inducible	0.000980842	0	downregulated	downregulated
202759_s_at	9q31-q33	AKAP2	A kinase (PRKA) anchor protein 2	2.04036e-06	0	0	downregulated
202760_s_at	9q31-q33	PALM2-AKAP2	PALM2-AKAP2 readthrough transcript	3.23523e-06	0	0	downregulated
202768_at	19q13.32	FOSB	FBJ murine osteosarcoma viral oncogene homolog B	8.17425e-06	0	upregulated	upregulated
202769_at	4q21.1	CCNG2	cyclin G2	1.76447e-06	0	0	upregulated
202786_at	2q24.3	STK39	serine threonine kinase 39 (STE20/SPS1 homolog, yeast)	0.000283173	0	0	downregulated
202796_at	5q33.1	SYNPO	synaptopodin	0.0010824	0	downregulated	downregulated
202847_at	14q12	PCK2	phosphoenolpyruvate carboxykinase 2 (mitochondrial)	0.000150475	upregulated	upregulated	upregulated
202855_s_at	17q25	SLC16A3	solute carrier family 16, member 3 (monocarboxylic acid transporter 4)	0.00884182	0	upregulated	0
202859_x_at	4q13-q21	IL8	interleukin 8	0.00737484	upregulated	upregulated	upregulated
202863_at	2q37.1	SP100	SP100 nuclear antigen	0.000108009	0	downregulated	downregulated
202864_s_at	2q37.1	SP100	SP100 nuclear antigen	7.78342e-05	0	downregulated	downregulated
202869_at	12q24.1	OAS1	2',5'-oligoadenylate synthetase 1, 40/46kDa	2.05229e-08	0	downregulated	downregulated
202887_s_at	10pter-q26.12	DDIT4	DNA-damage-inducible transcript 4	3.7227e-06	upregulated	upregulated	upregulated
202917_s_at	1q21	S100A8	S100 calcium binding protein A8	0.00179016	0	0	downregulated
202934_at	2p13	HK2	hexokinase 2	0.00012706	0	0	downregulated
202936_s_at	17q24.3-q25.1	SOX9	SRY (sex determining region Y)-box 9	0.00366099	0	downregulated	downregulated
202949_s_at	2q12-q14	FHL2	four and a half LIM domains 2	0.000102034	0	0	downregulated
202962_at	8p21.1	KIF13B	kinesin family member 13B	0.000793406	0	downregulated	downregulated
202973_x_at	4q22.1	FAM13A	family with sequence similarity 13, member A	0.0040606	0	0	upregulated
202976_s_at	5q15	RHOBTB3	Rho-related BTB domain containing 3	3.21185e-05	0	0	downregulated
203023_at	5q35.2	NOP16	NOP16 nucleolar protein homolog (yeast)	8.40827e-07	0	upregulated	0
203032_s_at	1q42.1	FH	fumarate hydratase	1.49797e-05	upregulated	upregulated	upregulated
203058_s_at	10q23-q24	PAPSS2	3'-phosphoadenosine 5'-phosphosulfate synthase 2	0.00248201	0	downregulated	downregulated
203109_at	19q13.43	UBE2M	ubiquitin-conjugating enzyme E2M (UBC12 homolog, yeast)	0.0202312	0	upregulated	upregulated
203126_at	18p11.2	IMPA2	inositol(myo)-1(or 4)-monophosphatase 2	0.000326583	0	0	upregulated
203139_at	9q34.1	DAPK1	death-associated protein kinase 1	4.90905e-05	0	downregulated	0
203140_at	3q27	BCL6	B-cell CLL/lymphoma 6	1.64867e-05	0	0	upregulated
203143_s_at	1q24-q25	KIAA0040	KIAA0040	0.00234623	0	downregulated	downregulated
203144_s_at	1q24-q25	KIAA0040	KIAA0040	9.94324e-05	0	downregulated	downregulated
203159_at	2q32-q34	GLS	glutaminase	0.00131294	0	0	upregulated
203176_s_at	10q21	TFAM	transcription factor A, mitochondrial	2.24654e-05	upregulated	upregulated	upregulated
203227_s_at	12q13.3	TSPAN31	tetraspanin 31	0.000199713	0	0	downregulated
203231_s_at	6p23	ATXN1	ataxin 1	0.000298478	0	downregulated	downregulated
203232_s_at	6p23	ATXN1	ataxin 1	3.10553e-05	downregulated	downregulated	downregulated
203234_at	7p12.3	UPP1	uridine phosphorylase 1	8.93641e-08	upregulated	upregulated	upregulated
203242_s_at	4q22	PDLIM5	PDZ and LIM domain 5	0.000943998	0	0	downregulated
203258_at	11q13.3	DRAP1	DR1-associated protein 1 (negative cofactor 2 alpha)	0.000712381	upregulated	upregulated	upregulated
203267_s_at	17p11.2	DRG2	developmentally regulated GTP binding protein 2	0.00859641	0	upregulated	upregulated
203275_at	4q34.1-q35.1	IRF2	interferon regulatory factor 2	5.465e-06	0	downregulated	0
203278_s_at	11p11.2	PHF21A	PHD finger protein 21A	1.2258e-06	0	downregulated	0
203306_s_at	6q15	SLC35A1	solute carrier family 35 (CMP-sialic acid transporter), member A1	0.00251635	0	0	upregulated
203333_at	1q24.2	KIFAP3	kinesin-associated protein 3	0.0251838	0	downregulated	0
203380_x_at	14q24	SFRS5	splicing factor, arginine/serine-rich 5	0.000133537	0	downregulated	downregulated
203394_s_at	3q28-q29	HES1	hairy and enhancer of split 1, (Drosophila)	0.000258457	0	upregulated	upregulated
203395_s_at	3q28-q29	HES1	hairy and enhancer of split 1, (Drosophila)	0.000108009	0	upregulated	upregulated
203404_at	Xq21.33-q22.2	ARMCX2	armadillo repeat containing, X-linked 2	1.22345e-05	0	downregulated	downregulated
203438_at	5q35.2	STC2	stanniocalcin 2	2.18672e-08	upregulated	upregulated	downregulated
203439_s_at	5q35.2	STC2	stanniocalcin 2	1.84938e-09	upregulated	upregulated	0
203445_s_at	12q13-q15	CTDSP2	CTD (carboxy-terminal domain, RNA polymerase II, polypeptide A) small phosphatase 2	2.65228e-06	0	downregulated	0
203466_at	2p23.3	MPV17	MpV17 mitochondrial inner membrane protein	0.0380479	0	0	upregulated
203491_s_at	11q21	CEP57	centrosomal protein 57kDa	0.0234476	upregulated	0	upregulated
203496_s_at	17q12-q21.1	MED1	mediator complex subunit 1	0.0297599	upregulated	upregulated	upregulated
203499_at	1p36	EPHA2	EPH receptor A2	0.000574071	0	downregulated	downregulated
203504_s_at	9q31.1	ABCA1	ATP-binding cassette, sub-family A (ABC1), member 1	0.000191355	0	downregulated	downregulated
203511_s_at	1p34.3	TRAPPC3	trafficking protein particle complex 3	0.00199591	upregulated	upregulated	upregulated
203562_at	11q24.2	FEZ1	fasciculation and elongation protein zeta 1 (zygin I)	0.000233222	0	0	downregulated
203567_s_at	6p21.3	TRIM38	tripartite motif-containing 38	1.82587e-06	0	downregulated	0
203568_s_at	6p21.3	TRIM38	tripartite motif-containing 38	0.000528044	upregulated	0	upregulated
203586_s_at	17q12-q21	ARL4D	ADP-ribosylation factor-like 4D	0.000829139	0	upregulated	upregulated
203610_s_at	6p21.3	TRIM38	tripartite motif-containing 38	5.6869e-05	0	0	upregulated
203622_s_at	2p14	PNO1	partner of NOB1 homolog (S. cerevisiae)	4.88868e-07	0	upregulated	0
203633_at	11q13.1-q13.2	CPT1A	carnitine palmitoyltransferase 1A (liver)	5.42869e-05	0	upregulated	upregulated
203636_at	Xp22	MID1	midline 1 (Opitz/BBB syndrome)	0.000159487	downregulated	downregulated	downregulated
203653_s_at	17q22-q23	COIL	coilin	0.000128775	upregulated	upregulated	upregulated
203741_s_at	16q12-q13	ADCY7	adenylate cyclase 7	4.9063e-05	downregulated	downregulated	downregulated
203753_at	18q21.1	TCF4	transcription factor 4	0.0415285	upregulated	0	0
203780_at	11q24	MPZL2	myelin protein zero-like 2	0.0164939	0	0	downregulated
203821_at	5q23	HBEGF	heparin-binding EGF-like growth factor	5.15795e-05	upregulated	upregulated	0
203822_s_at	4q28	ELF2	E74-like factor 2 (ets domain transcription factor)	0.00250231	0	0	upregulated
203874_s_at	Xq25	SMARCA1	SWI/SNF related, matrix associated, actin dependent regulator of chromatin, subfamily a, member 1	0.0102571	0	downregulated	downregulated
203875_at	Xq25	SMARCA1	SWI/SNF related, matrix associated, actin dependent regulator of chromatin, subfamily a, member 1	0.014646	0	0	downregulated
203887_s_at	20p11.2	THBD	thrombomodulin	6.25202e-07	0	downregulated	downregulated
203888_at	20p11.2	THBD	thrombomodulin	1.99852e-06	0	0	downregulated
203925_at	1p22.1	GCLM	glutamate-cysteine ligase, modifier subunit	7.83675e-05	0	0	downregulated
203931_s_at	17q25	MRPL12	mitochondrial ribosomal protein L12	0.000775216	0	upregulated	upregulated
203966_s_at	14q23.1	PPM1A	protein phosphatase 1A (formerly 2C), magnesium-dependent, alpha isoform	3.08112e-05	0	downregulated	downregulated
203975_s_at	19p13.3	CHAF1A	chromatin assembly factor 1, subunit A (p150)	0.000957911	upregulated	upregulated	upregulated
203989_x_at	5q13	F2R	coagulation factor II (thrombin) receptor	0.000837472	0	0	downregulated
203991_s_at	Xp11.2	UTX	ubiquitously transcribed tetratricopeptide repeat, X chromosome	0.0323049	0	0	downregulated
203992_s_at	Xp11.2	UTX	ubiquitously transcribed tetratricopeptide repeat, X chromosome	0.00205932	0	downregulated	downregulated
204000_at	15q21.2	GNB5	guanine nucleotide binding protein (G protein), beta 5	3.13233e-05	0	downregulated	downregulated
204014_at	8p12-p11	DUSP4	dual specificity phosphatase 4	6.89092e-07	upregulated	0	downregulated
204015_s_at	8p12-p11	DUSP4	dual specificity phosphatase 4	3.81755e-08	upregulated	0	downregulated
204027_s_at	12q13	METTL1	methyltransferase like 1	5.30128e-05	0	upregulated	0
204030_s_at	3q25.33	SCHIP1	schwannomin interacting protein 1	3.07563e-05	0	downregulated	downregulated
204032_at	1p22.1	BCAR3	breast cancer anti-estrogen resistance 3	3.51377e-06	0	downregulated	downregulated
204033_at	5p15.33	TRIP13	thyroid hormone receptor interactor 13	3.51377e-06	0	0	downregulated
204036_at	9q31.3	LPAR1	lysophosphatidic acid receptor 1	0.000561261	0	0	downregulated
204038_s_at	9q31.3	LPAR1	lysophosphatidic acid receptor 1	2.62846e-05	0	0	downregulated
204039_at	19q13.1	CEBPA	CCAAT/enhancer binding protein (C/EBP), alpha	0.00581077	0	upregulated	upregulated
204060_s_at	Xp22.3	PRKX	protein kinase, X-linked	2.33621e-05	downregulated	downregulated	0
204061_at	Xp22.3	PRKX	protein kinase, X-linked	0.000243624	0	downregulated	downregulated
204062_s_at	17p11.2	ULK2	unc-51-like kinase 2 (C. elegans)	0.00219468	downregulated	downregulated	downregulated
204069_at	2p14-p13	MEIS1	Meis homeobox 1	1.72902e-05	0	upregulated	upregulated
204087_s_at	2p23	SLC5A6	solute carrier family 5 (sodium-dependent vitamin transporter), member 6	0.000603962	0	upregulated	upregulated
204133_at	3p21.1	RRP9	ribosomal RNA processing 9, small subunit (SSU) processome component, homolog (yeast)	0.0382296	0	upregulated	0
204135_at	3q12.1	FILIP1L	filamin A interacting protein 1-like	0.00421221	0	downregulated	0
204136_at	3p21.1	COL7A1	collagen, type VII, alpha 1	5.17471e-05	0	0	upregulated
204137_at	1q42-q43	GPR137B	G protein-coupled receptor 137B	2.22469e-05	downregulated	downregulated	downregulated
204151_x_at	10p15-p14	AKR1C1	aldo-keto reductase family 1, member C1 (dihydrodiol dehydrogenase 1; 20-alpha (3-alpha)-hydroxysteroid dehydrogenase)	0.000281849	0	upregulated	upregulated
204175_at	1p36.11	ZNF593	zinc finger protein 593	0.00235389	0	upregulated	0
204199_at	9q33.3	RALGPS1	Ral GEF with PH domain and SH3 binding motif 1	3.75042e-06	downregulated	downregulated	downregulated
204200_s_at	22q12.3-q13.1	PDGFB	platelet-derived growth factor beta polypeptide (simian sarcoma viral (v-sis) oncogene homolog)	0.0176356	0	0	downregulated
204203_at	19q13.11	CEBPG	CCAAT/enhancer binding protein (C/EBP), gamma	1.41598e-05	upregulated	upregulated	0
204205_at	22q13.1-q13.2	APOBEC3G	apolipoprotein B mRNA editing enzyme, catalytic polypeptide-like 3G	0.00144736	0	0	downregulated
204214_s_at	6q24.3	RAB32	RAB32, member RAS oncogene family	0.000629052	0	0	downregulated
204222_s_at	12q21.2	GLIPR1	GLI pathogenesis-related 1	1.3964e-06	upregulated	upregulated	upregulated
204238_s_at	6p21.1	C6orf108	chromosome 6 open reading frame 108	0.0036709	0	0	upregulated
204284_at	10q23-q24	PPP1R3C	protein phosphatase 1, regulatory (inhibitor) subunit 3C	0.000185371	downregulated	downregulated	0
204326_x_at	16q13	MT1X	metallothionein 1X	1.13727e-07	0	upregulated	upregulated
204327_s_at	11q23.3	ZNF202	zinc finger protein 202	0.00076869	0	0	downregulated
204330_s_at	19q13.1-q13.2	MRPS12	mitochondrial ribosomal protein S12	0.000345169	0	upregulated	upregulated
204334_at	2q32	KLF7	Kruppel-like factor 7 (ubiquitous)	4.31689e-05	0	downregulated	downregulated
204341_at	17p11.2	TRIM16	tripartite motif-containing 16	0.000247386	0	0	downregulated
204359_at	14q24-q32	FLRT2	fibronectin leucine rich transmembrane protein 2	0.000856467	0	upregulated	upregulated
204362_at	7p21-p15	SKAP2	src kinase associated phosphoprotein 2	0.0143372	0	downregulated	downregulated
204388_s_at	Xp11.3	MAOA	monoamine oxidase A	6.44582e-05	0	0	downregulated
204396_s_at	10q24-qter	GRK5	G protein-coupled receptor kinase 5	0.000115075	0	downregulated	downregulated
204400_at	14q11.2-q12	EFS	embryonal Fyn-associated substrate	1.22283e-06	0	0	upregulated
204401_at	19q13.2	KCNN4	potassium intermediate/small conductance calcium-activated channel, subfamily N, member 4	8.2588e-05	0	downregulated	downregulated
204420_at	11q13	FOSL1	FOS-like antigen 1	0.000699	0	0	downregulated
204446_s_at	10q11.2	ALOX5	arachidonate 5-lipoxygenase	2.88888e-06	downregulated	downregulated	downregulated
204457_s_at	9q21.3-q22	GAS1	growth arrest-specific 1	6.61792e-06	0	upregulated	upregulated
204472_at	8q13-q21	GEM	GTP binding protein overexpressed in skeletal muscle	6.23512e-05	0	upregulated	upregulated
204475_at	11q22.3	MMP1	matrix metallopeptidase 1 (interstitial collagenase)	2.40392e-08	upregulated	upregulated	upregulated
204497_at	16p13.3	ADCY9	adenylate cyclase 9	4.96068e-05	downregulated	downregulated	downregulated
204529_s_at	8q12.1	TOX	thymocyte selection-associated high mobility group box	0.000282489	0	downregulated	downregulated
204537_s_at	Xq28	GABRE	gamma-aminobutyric acid (GABA) A receptor, epsilon	7.56498e-05	0	0	upregulated
204554_at	20q13.3	PPP1R3D	protein phosphatase 1, regulatory (inhibitor) subunit 3D	0.000294119	0	upregulated	upregulated
204566_at	17q23.2	PPM1D	protein phosphatase 1D magnesium-dependent, delta isoform	3.41374e-05	0	0	upregulated
204567_s_at	21q22.3	ABCG1	ATP-binding cassette, sub-family G (WHITE), member 1	7.55452e-06	0	downregulated	downregulated
204568_at	14q22.3	KIAA0831	KIAA0831	0.000113271	0	upregulated	upregulated
204573_at	7q21.1	CROT	carnitine O-octanoyltransferase	5.32514e-06	0	0	upregulated
204589_at	12q23.3	NUAK1	NUAK family, SNF1-like kinase, 1	2.46841e-07	0	downregulated	downregulated
204607_at	1p13-p12	HMGCS2	3-hydroxy-3-methylglutaryl-Coenzyme A synthase 2 (mitochondrial)	3.26431e-05	0	upregulated	0
204614_at	18q21.3	SERPINB2	serpin peptidase inhibitor, clade B (ovalbumin), member 2	1.13727e-07	0	upregulated	downregulated
204621_s_at	2q22-q23	NR4A2	nuclear receptor subfamily 4, group A, member 2	7.44487e-06	upregulated	upregulated	upregulated
204622_x_at	2q22-q23	NR4A2	nuclear receptor subfamily 4, group A, member 2	7.48926e-06	0	upregulated	upregulated
204642_at	1p21	S1PR1	sphingosine-1-phosphate receptor 1	1.57788e-05	0	0	downregulated
204688_at	7q21-q22	SGCE	sarcoglycan, epsilon	0.000587522	0	0	downregulated
204702_s_at	7p15-p14	NFE2L3	nuclear factor (erythroid-derived 2)-like 3	9.5544e-05	0	downregulated	downregulated
204745_x_at	16q13	MT1G	metallothionein 1G	7.56752e-07	0	upregulated	upregulated
204783_at	3q25.1	MLF1	myeloid leukemia factor 1	0.0107558	0	0	downregulated
204790_at	18q21.1	SMAD7	SMAD family member 7	0.000627481	0	downregulated	downregulated
204794_at	2q11	DUSP2	dual specificity phosphatase 2	2.60394e-05	0	upregulated	0
204798_at	6q22-q23	MYB	v-myb myeloblastosis viral oncogene homolog (avian)	6.584e-05	0	0	upregulated
204808_s_at	12q14.2	TMEM5	transmembrane protein 5	6.8107e-05	upregulated	upregulated	upregulated
204820_s_at	6p21.3	BTN3A3	butyrophilin, subfamily 3, member A3	6.25202e-07	0	downregulated	downregulated
204821_at	6p21.3	BTN3A3	butyrophilin, subfamily 3, member A3	5.1562e-06	0	downregulated	0
204855_at	18q21.3	SERPINB5	serpin peptidase inhibitor, clade B (ovalbumin), member 5	6.32672e-05	0	0	downregulated
204859_s_at	12q23	APAF1	apoptotic peptidase activating factor 1	0.0035761	0	downregulated	0
204868_at	17q25.1	ICT1	immature colon carcinoma transcript 1	0.00220115	0	upregulated	upregulated
204881_s_at	9q31	UGCG	UDP-glucose ceramide glucosyltransferase	0.00500587	0	0	downregulated
204899_s_at	4q34.1	SAP30	Sin3A-associated protein, 30kDa	5.49431e-05	upregulated	upregulated	upregulated
204908_s_at	19q13.1-q13.2	BCL3	B-cell CLL/lymphoma 3	2.76916e-05	0	downregulated	downregulated
204917_s_at	9p22	MLLT3	myeloid/lymphoid or mixed-lineage leukemia (trithorax homolog, Drosophila); translocated to, 3	0.00715146	0	downregulated	0
204932_at	8q24	TNFRSF11B	tumor necrosis factor receptor superfamily, member 11b	1.29508e-07	0	upregulated	upregulated
204933_s_at	8q24	TNFRSF11B	tumor necrosis factor receptor superfamily, member 11b	5.32514e-06	0	upregulated	upregulated
204937_s_at	19qter	ZNF274	zinc finger protein 274	4.49697e-05	0	downregulated	downregulated
204948_s_at	5q11.2	FST	follistatin	1.23492e-05	0	0	downregulated
204952_at	19q13.31	LYPD3	LY6/PLAUR domain containing 3	0.00164248	0	0	upregulated
204958_at	1p34.1	PLK3	polo-like kinase 3 (Drosophila)	0.00378966	0	0	downregulated
204972_at	12q24.2	OAS2	2'-5'-oligoadenylate synthetase 2, 69/71kDa	7.4375e-08	0	0	downregulated
205001_s_at	Yq11	DDX3Y	DEAD (Asp-Glu-Ala-Asp) box polypeptide 3, Y-linked	0.00835506	upregulated	0	upregulated
205016_at	2p13	TGFA	transforming growth factor, alpha	3.03218e-06	0	0	downregulated
205031_at	17p13.1-p11.2	EFNB3	ephrin-B3	7.44487e-06	0	0	downregulated
205047_s_at	7q21.3	ASNS	asparagine synthetase	6.61792e-06	upregulated	upregulated	upregulated
205067_at	2q14	IL1B	interleukin 1, beta	2.18672e-08	upregulated	0	downregulated
205107_s_at	1q21-q22	EFNA4	ephrin-A4	2.29749e-05	0	0	upregulated
205111_s_at	10q23	PLCE1	phospholipase C, epsilon 1	0.00272725	0	downregulated	0
205139_s_at	6q25.1	UST	uronyl-2-sulfotransferase	2.06732e-05	0	downregulated	downregulated
205192_at	17q21	MAP3K14	mitogen-activated protein kinase kinase kinase 14	0.0202887	0	downregulated	downregulated
205193_at	22q13.1	MAFF	v-maf musculoaponeurotic fibrosarcoma oncogene homolog F (avian)	0.00505896	0	downregulated	downregulated
205195_at	7q22.1	AP1S1	adaptor-related protein complex 1, sigma 1 subunit	0.00319918	0	upregulated	0
205196_s_at	7q22.1	AP1S1	adaptor-related protein complex 1, sigma 1 subunit	0.00115922	upregulated	upregulated	upregulated
205203_at	3q26	PLD1	phospholipase D1, phosphatidylcholine-specific	0.000264002	0	downregulated	downregulated
205207_at	7p21	IL6	interleukin 6 (interferon, beta 2)	1.7194e-06	upregulated	upregulated	upregulated
205217_at	Xq22.1	TIMM8A	translocase of inner mitochondrial membrane 8 homolog A (yeast)	8.09513e-05	0	upregulated	0
205220_at	12q24.31	NIACR2	niacin receptor 2	0.000114196	0	downregulated	downregulated
205239_at	4q13-q21	AREG	amphiregulin	3.59368e-06	0	0	downregulated
205249_at	10q21.1	EGR2	early growth response 2 (Krox-20 homolog, Drosophila)	1.58275e-08	0	upregulated	upregulated
205266_at	22q12.2	LIF	leukemia inhibitory factor (cholinergic differentiation factor)	5.58606e-07	0	downregulated	downregulated
205289_at	20p12	BMP2	bone morphogenetic protein 2	6.15195e-06	0	upregulated	0
205290_s_at	20p12	BMP2	bone morphogenetic protein 2	4.20541e-06	0	upregulated	upregulated
205330_at	22q11	MN1	meningioma (disrupted in balanced translocation) 1	2.54396e-05	downregulated	0	0
205363_at	11p14.2	BBOX1	butyrobetaine (gamma), 2-oxoglutarate dioxygenase (gamma-butyrobetaine hydroxylase) 1	8.40827e-07	0	upregulated	upregulated
205381_at	7q22.1	LRRC17	leucine rich repeat containing 17	3.08736e-05	0	downregulated	0
205398_s_at	15q22.33	SMAD3	SMAD family member 3	0.00548166	0	0	downregulated
205405_at	5p15.2	SEMA5A	sema domain, seven thrombospondin repeats (type 1 and type 1-like), transmembrane domain (TM) and short cytoplasmic domain, (semaphorin) 5A	0.0003361	0	0	upregulated
205407_at	9p13.3	RECK	reversion-inducing-cysteine-rich protein with kazal motifs	9.47389e-05	downregulated	downregulated	0
205443_at	14q22	SNAPC1	small nuclear RNA activating complex, polypeptide 1, 43kDa	0.00124209	upregulated	0	0
205462_s_at	2p25.1	HPCAL1	hippocalcin-like 1	0.000112023	0	upregulated	upregulated
205466_s_at	4p16	HS3ST1	heparan sulfate (glucosamine) 3-O-sulfotransferase 1	6.13772e-06	upregulated	upregulated	downregulated
205476_at	2q33-q37	CCL20	chemokine (C-C motif) ligand 20	0.000137584	upregulated	upregulated	upregulated
205525_at	7q33	CALD1	caldesmon 1	0.00901801	0	downregulated	downregulated
205540_s_at	Xp11.21	RRAGB	Ras-related GTP binding B	0.00131874	downregulated	downregulated	0
205579_at	3p25	HRH1	histamine receptor H1	6.25202e-07	0	downregulated	downregulated
205594_at	17q21.32	ZNF652	zinc finger protein 652	0.00862176	0	0	upregulated
205646_s_at	11p13	PAX6	paired box 6	0.000118275	0	upregulated	upregulated
205676_at	12q13.1-q13.3	CYP27B1	cytochrome P450, family 27, subfamily B, polypeptide 1	3.01418e-06	0	0	downregulated
205680_at	11q22.3	MMP10	matrix metallopeptidase 10 (stromelysin 2)	1.58275e-08	0	upregulated	upregulated
205691_at	16p13	SYNGR3	synaptogyrin 3	0.000118245	0	downregulated	downregulated
205729_at	5p13.1	OSMR	oncostatin M receptor	0.00342432	0	0	downregulated
205748_s_at	19p13.3	RNF126	ring finger protein 126	0.00589189	0	upregulated	upregulated
205749_at	15q24.1	CYP1A1	cytochrome P450, family 1, subfamily A, polypeptide 1	5.31515e-06	upregulated	upregulated	upregulated
205767_at	4q13.3	EREG	epiregulin	1.07815e-05	upregulated	0	downregulated
205771_s_at	6q23	AKAP7	A kinase (PRKA) anchor protein 7	0.00613998	downregulated	downregulated	downregulated
205822_s_at	5p14-p13	HMGCS1	3-hydroxy-3-methylglutaryl-Coenzyme A synthase 1 (soluble)	0.00385495	downregulated	0	0
205865_at	19p13.3	ARID3A	AT rich interactive domain 3A (BRIGHT-like)	4.36521e-06	0	downregulated	0
205916_at	1q21	S100A7	S100 calcium binding protein A7	5.74282e-06	0	0	downregulated
206020_at	18q22.2	SOCS6	suppressor of cytokine signaling 6	0.00136278	0	downregulated	downregulated
206027_at	1q21	S100A3	S100 calcium binding protein A3	0.000369019	0	0	downregulated
206029_at	10q23.31	ANKRD1	ankyrin repeat domain 1 (cardiac muscle)	4.68041e-09	0	downregulated	downregulated
206034_at	18q21.3	SERPINB8	serpin peptidase inhibitor, clade B (ovalbumin), member 8	0.000239525	0	upregulated	0
206042_x_at	15q12	SNURF	SNRPN upstream reading frame	0.00135539	upregulated	upregulated	upregulated
206082_at	6p21.3	HCP5	HLA complex P5	7.21652e-06	0	downregulated	0
206101_at	9q22.3	ECM2	extracellular matrix protein 2, female organ and adipocyte specific	8.1544e-05	0	upregulated	0
206108_s_at	20q12-q13.1	SFRS6	splicing factor, arginine/serine-rich 6	0.00120958	0	0	downregulated
206115_at	8p23-p21	EGR3	early growth response 3	1.84273e-05	0	upregulated	upregulated
206175_x_at	19q13.2	ZNF222	zinc finger protein 222	0.00961976	0	0	upregulated
206237_s_at	8p12	NRG1	neuregulin 1	6.25202e-07	0	0	downregulated
206245_s_at	1q25.1-q31.1	IVNS1ABP	influenza virus NS1A binding protein	3.51377e-06	0	downregulated	downregulated
206272_at	1q42.11-q42.3	SPHAR	S-phase response (cyclin-related)	0.0110921	0	0	downregulated
206284_x_at	4q2-q3	CLTB	clathrin, light chain (Lcb)	0.0439497	0	0	upregulated
206336_at	4q21	CXCL6	chemokine (C-X-C motif) ligand 6 (granulocyte chemotactic protein 2)	4.39271e-05	0	downregulated	downregulated
206343_s_at	8p12	NRG1	neuregulin 1	4.90339e-08	0	0	downregulated
206357_at	19q13.32	OPA3	optic atrophy 3 (autosomal recessive, with chorea and spastic paraplegia)	0.0343115	0	upregulated	upregulated
206363_at	16q22-q23	MAF	v-maf musculoaponeurotic fibrosarcoma oncogene homolog (avian)	1.34582e-06	0	0	upregulated
206382_s_at	11p13	BDNF	brain-derived neurotrophic factor	8.1428e-05	upregulated	downregulated	downregulated
206400_at	19q13.2	LGALS7	lectin, galactoside-binding, soluble, 7	8.96053e-06	0	upregulated	upregulated
206432_at	8q24.12	HAS2	hyaluronan synthase 2	5.04301e-05	0	0	downregulated
206445_s_at	19q13.3	PRMT1	protein arginine methyltransferase 1	7.54054e-05	upregulated	upregulated	upregulated
206461_x_at	16q13	MT1H	metallothionein 1H	5.04261e-07	0	upregulated	upregulated
206499_s_at	1p36.1	RCC1	regulator of chromosome condensation 1	0.000792062	0	upregulated	upregulated
206504_at	20q13	CYP24A1	cytochrome P450, family 24, subfamily A, polypeptide 1	8.17425e-06	0	downregulated	downregulated
206526_at	22q13.31	RIBC2	RIB43A domain with coiled-coils 2	3.57587e-05	0	0	upregulated
206569_at	1q32	IL24	interleukin 24	0.000148253	upregulated	0	downregulated
206703_at	17p13.1	CHRNB1	cholinergic receptor, nicotinic, beta 1 (muscle)	0.016847	0	upregulated	0
206777_s_at	22q11.2-q12.1	CRYBB2	crystallin, beta B2	0.0363166	0	0	upregulated
206801_at	1p36.2	NPPB	natriuretic peptide precursor B	3.13233e-05	0	0	downregulated
206858_s_at	12q13.3	HOXC6	homeobox C6	6.23669e-06	0	upregulated	upregulated
206907_at	19p13.3	TNFSF9	tumor necrosis factor (ligand) superfamily, member 9	0.00206909	0	downregulated	0
206918_s_at	20q11.22	CPNE1	copine I	0.0419444	0	0	upregulated
207079_s_at	14q24.2	MED6	mediator complex subunit 6	0.000200534	upregulated	upregulated	upregulated
207090_x_at	19q13.12	ZFP30	zinc finger protein 30 homolog (mouse)	0.018526	0	0	upregulated
207147_at	2q32	DLX2	distal-less homeobox 2	0.00106866	0	downregulated	downregulated
207156_at	6p22.1	HIST1H2AG	histone cluster 1, H2ag	6.30146e-05	downregulated	0	0
207198_s_at	2q12.3-q13	LIMS1	LIM and senescent cell antigen-like domains 1	0.00109483	upregulated	upregulated	upregulated
207515_s_at	6p21.1	POLR1C	polymerase (RNA) I polypeptide C, 30kDa	0.000215356	0	upregulated	0
207517_at	1q25-q31	LAMC2	laminin, gamma 2	7.38329e-05	0	0	downregulated
207543_s_at	10q21.3-q23.1	P4HA1	prolyl 4-hydroxylase, alpha polypeptide I	0.00676228	0	downregulated	downregulated
207559_s_at	Xq13.1	ZMYM3	zinc finger, MYM-type 3	0.00247999	0	downregulated	0
207565_s_at	1q25.3	MR1	major histocompatibility complex, class I-related	4.67396e-05	0	downregulated	downregulated
207655_s_at	10q23.2-q23.33	BLNK	B-cell linker	2.05229e-08	downregulated	downregulated	downregulated
207717_s_at	12p11	PKP2	plakophilin 2	0.000791208	0	downregulated	downregulated
207740_s_at	19q13.33	NUP62	nucleoporin 62kDa	0.00866142	0	upregulated	upregulated
207768_at	2p13	EGR4	early growth response 4	1.47638e-06	0	upregulated	upregulated
207769_s_at	Xp11.23	PQBP1	polyglutamine binding protein 1	0.000708733	upregulated	upregulated	upregulated
207850_at	4q21	CXCL3	chemokine (C-X-C motif) ligand 3	0.000677239	upregulated	upregulated	upregulated
207980_s_at	6q23.3	CITED2	Cbp/p300-interacting transactivator, with Glu/Asp-rich carboxy-terminal domain, 2	0.00305268	0	0	upregulated
208012_x_at	2q37.1	SP110	SP110 nuclear body protein	5.86368e-05	0	downregulated	downregulated
208047_s_at	2q32.3-q33	NAB1	NGFI-A binding protein 1 (EGR1 binding protein 1)	0.0499129	0	0	downregulated
208083_s_at	2q24.2	ITGB6	integrin, beta 6	0.0172676	0	0	downregulated
208095_s_at	10q22	CAMK2G	calcium/calmodulin-dependent protein kinase II gamma	0.039779	upregulated	upregulated	0
208161_s_at	17q22	ABCC3	ATP-binding cassette, sub-family C (CFTR/MRP), member 3	0.00168373	0	upregulated	0
208230_s_at	8p12	NRG1	neuregulin 1	0.000509788	0	0	downregulated
208241_at	8p12	NRG1	neuregulin 1	0.000345169	upregulated	0	0
208483_x_at	17q12-q21	KRT33A	keratin 33A	4.59663e-07	0	upregulated	0
208510_s_at	3p25	PPARG	peroxisome proliferator-activated receptor gamma	8.10661e-05	0	downregulated	downregulated
208541_x_at	10q21	TFAM	transcription factor A, mitochondrial	7.55872e-05	upregulated	upregulated	upregulated
208579_x_at	21q22.3	H2BFS	H2B histone family, member S	0.000758226	0	upregulated	upregulated
208581_x_at	16q13	MT1X	metallothionein 1X	5.09677e-07	0	upregulated	upregulated
208610_s_at	16p13.3	SRRM2	serine/arginine repetitive matrix 2	0.0274918	upregulated	upregulated	upregulated
208621_s_at	6q25.2-q26	EZR	ezrin	0.00281725	upregulated	upregulated	upregulated
208624_s_at	3q27-qter	EIF4G1	eukaryotic translation initiation factor 4 gamma, 1	0.0055979	upregulated	upregulated	upregulated
208629_s_at	2p23	HADHA	hydroxyacyl-Coenzyme A dehydrogenase/3-ketoacyl-Coenzyme A thiolase/enoyl-Coenzyme A hydratase (trifunctional protein), alpha subunit	0.00464878	upregulated	upregulated	upregulated
208631_s_at	2p23	HADHA	hydroxyacyl-Coenzyme A dehydrogenase/3-ketoacyl-Coenzyme A thiolase/enoyl-Coenzyme A hydratase (trifunctional protein), alpha subunit	0.000129982	downregulated	downregulated	downregulated
208634_s_at	1p32-p31	MACF1	microtubule-actin crosslinking factor 1	0.0171684	0	downregulated	0
208663_s_at	21q22.2	TTC3	tetratricopeptide repeat domain 3	0.0231651	upregulated	0	upregulated
208670_s_at	15q21.1-q21.2	EID1	EP300 interacting inhibitor of differentiation 1	0.00169339	upregulated	upregulated	upregulated
208687_x_at	11q24.1	HSPA8	heat shock 70kDa protein 8	1.1146e-05	0	upregulated	0
208693_s_at	7p15	GARS	glycyl-tRNA synthetase	4.62776e-05	0	upregulated	0
208707_at	14q32.32	EIF5	eukaryotic translation initiation factor 5	0.0497584	0	downregulated	0
208711_s_at	11q13	CCND1	cyclin D1	0.00230107	upregulated	upregulated	0
208729_x_at	6p21.3	HLA-B	major histocompatibility complex, class I, B	0.0462059	0	0	upregulated
208750_s_at	1q42	ARF1	ADP-ribosylation factor 1	0.00153846	0	upregulated	upregulated
208776_at	17q11.2	PSMD11	proteasome (prosome, macropain) 26S subunit, non-ATPase, 11	5.31799e-05	downregulated	downregulated	downregulated
208796_s_at	5q32-q34	CCNG1	cyclin G1	0.007335	0	downregulated	0
208813_at	10q24.1-q25.1	GOT1	glutamic-oxaloacetic transaminase 1, soluble (aspartate aminotransferase 1)	0.000589979	0	upregulated	0
208859_s_at	Xq13.1-q21.1	ATRX	alpha thalassemia/mental retardation syndrome X-linked (RAD54 homolog, S. cerevisiae)	0.0275599	0	upregulated	upregulated
208869_s_at	12p13.2	GABARAPL1	GABA(A) receptor-associated protein like 1	1.28887e-05	0	downregulated	downregulated
208872_s_at	5q22-q23	REEP5	receptor accessory protein 5	0.000281249	upregulated	upregulated	upregulated
208879_x_at	20q13.33	PRPF6	PRP6 pre-mRNA processing factor 6 homolog (S. cerevisiae)	0.00933668	upregulated	upregulated	upregulated
208884_s_at	8q22	UBR5	ubiquitin protein ligase E3 component n-recognin 5	0.0181153	0	downregulated	0
208886_at	22q13.1	H1F0	H1 histone family, member 0	1.96088e-05	0	downregulated	downregulated
208900_s_at	20q12-q13.1	TOP1	topoisomerase (DNA) I	0.00960963	upregulated	upregulated	0
208907_s_at	6p21.3	MRPS18B	mitochondrial ribosomal protein S18B	0.000322423	upregulated	upregulated	upregulated
208916_at	19q13.3	SLC1A5	solute carrier family 1 (neutral amino acid transporter), member 5	0.0243088	0	upregulated	0
208926_at	6p21.3	NEU1	sialidase 1 (lysosomal sialidase)	0.0374467	0	0	upregulated
208928_at	7q11.2	POR	P450 (cytochrome) oxidoreductase	0.0150099	0	upregulated	upregulated
208930_s_at	19p13.2	ILF3	interleukin enhancer binding factor 3, 90kDa	0.00805777	upregulated	upregulated	upregulated
208960_s_at	10p15	KLF6	Kruppel-like factor 6	7.21755e-05	upregulated	0	0
208967_s_at	1p34	AK2	adenylate kinase 2	0.000494199	upregulated	upregulated	upregulated
208979_at	20q11	NCOA6	nuclear receptor coactivator 6	0.0130453	0	downregulated	0
208994_s_at	2q31.1	PPIG	peptidylprolyl isomerase G (cyclophilin G)	0.000231104	upregulated	upregulated	upregulated
208996_s_at	16q13-q21	POLR2C	polymerase (RNA) II (DNA directed) polypeptide C, 33kDa	0.00738918	0	upregulated	upregulated
209008_x_at	12q13	KRT8	keratin 8	0.000164393	0	upregulated	upregulated
209024_s_at	6q14-q15	SYNCRIP	synaptotagmin binding, cytoplasmic RNA interacting protein	0.000306075	upregulated	upregulated	upregulated
209031_at	11q23.2	CADM1	cell adhesion molecule 1	0.0133554	0	downregulated	0
209034_at	6q15	PNRC1	proline-rich nuclear receptor coactivator 1	3.6152e-05	0	0	upregulated
209037_s_at	11q13	EHD1	EH-domain containing 1	0.000189397	0	0	downregulated
209041_s_at	21q22.3	UBE2G2	ubiquitin-conjugating enzyme E2G 2 (UBC7 homolog, yeast)	5.65766e-05	upregulated	upregulated	upregulated
209068_at	4q13-q21	HNRPDL	heterogeneous nuclear ribonucleoprotein D-like	0.00437308	0	downregulated	downregulated
209078_s_at	22q13.1	TXN2	thioredoxin 2	0.00231451	upregulated	upregulated	upregulated
209088_s_at	16p13.3	UBN1	ubinuclein 1	0.00982223	upregulated	upregulated	upregulated
209100_at	3p21.3	IFRD2	interferon-related developmental regulator 2	8.68577e-06	0	upregulated	upregulated
209101_at	6q23.1	CTGF	connective tissue growth factor	0.00014515	0	downregulated	downregulated
209106_at	2p23	NCOA1	nuclear receptor coactivator 1	0.000333596	0	downregulated	0
209112_at	12p13.1-p12	CDKN1B	cyclin-dependent kinase inhibitor 1B (p27, Kip1)	9.03486e-05	0	upregulated	upregulated
209113_s_at	19p13.3	HMG20B	high-mobility group 20B	0.0242862	0	upregulated	upregulated
209126_x_at	12q12-q13	KRT6B	keratin 6B	0.0034501	0	upregulated	upregulated
209127_s_at	12q24.1	SART3	squamous cell carcinoma antigen recognized by T cells 3	0.00362637	upregulated	upregulated	upregulated
209136_s_at	16q24.1	USP10	ubiquitin specific peptidase 10	0.00193711	upregulated	upregulated	upregulated
209160_at	10p15-p14	AKR1C3	aldo-keto reductase family 1, member C3 (3-alpha hydroxysteroid dehydrogenase, type II)	0.0127422	0	0	upregulated
209173_at	7p21.3	AGR2	anterior gradient homolog 2 (Xenopus laevis)	1.27019e-07	0	upregulated	upregulated
209183_s_at	10q11.21	C10orf10	chromosome 10 open reading frame 10	0.000206836	downregulated	downregulated	0
209189_at	14q24.3	FOS	v-fos FBJ murine osteosarcoma viral oncogene homolog	1.16974e-05	0	upregulated	upregulated
209209_s_at	14q22.2	FERMT2	fermitin family homolog 2 (Drosophila)	0.00130593	0	downregulated	downregulated
209210_s_at	14q22.2	FERMT2	fermitin family homolog 2 (Drosophila)	0.000916845	0	downregulated	downregulated
209212_s_at	13q22.1	KLF5	Kruppel-like factor 5 (intestinal)	0.00386171	upregulated	upregulated	upregulated
209227_at	8p22	TUSC3	tumor suppressor candidate 3	0.0075631	0	downregulated	downregulated
209230_s_at	16p11.2	NUPR1	nuclear protein 1	0.00031238	0	upregulated	upregulated
209233_at	12p13	EMG1	EMG1 nucleolar protein homolog (S. cerevisiae)	0.000153799	0	0	upregulated
209234_at	1p36.2	KIF1B	kinesin family member 1B	1.57435e-05	downregulated	downregulated	downregulated
209247_s_at	7q36	ABCF2	ATP-binding cassette, sub-family F (GCN20), member 2	0.000807523	0	upregulated	0
209257_s_at	10q25	SMC3	structural maintenance of chromosomes 3	9.50089e-05	upregulated	upregulated	upregulated
209258_s_at	10q25	SMC3	structural maintenance of chromosomes 3	0.000510801	upregulated	upregulated	upregulated
209279_s_at	Xq28	NSDHL	NAD(P) dependent steroid dehydrogenase-like	0.00177779	0	0	upregulated
209291_at	6p22-p21	ID4	inhibitor of DNA binding 4, dominant negative helix-loop-helix protein	7.01118e-07	0	downregulated	downregulated
209292_at	6p22-p21	ID4	inhibitor of DNA binding 4, dominant negative helix-loop-helix protein	4.83389e-05	0	downregulated	downregulated
209301_at	8q22	CA2	carbonic anhydrase II	0.000716546	0	upregulated	0
209307_at	11p15	SWAP70	SWAP-70 protein	0.0206445	0	downregulated	0
209340_at	1q23.3	UAP1	UDP-N-acteylglucosamine pyrophosphorylase 1	0.032071	0	0	downregulated
209348_s_at	16q22-q23	MAF	v-maf musculoaponeurotic fibrosarcoma oncogene homolog (avian)	2.18672e-08	0	upregulated	upregulated
209372_x_at	6p25	TUBB2A	tubulin, beta 2A	0.000234607	0	upregulated	upregulated
209391_at	9q34.13	DPM2	dolichyl-phosphate mannosyltransferase polypeptide 2, regulatory subunit	0.037957	0	0	upregulated
209406_at	6p12.1-p11.2	BAG2	BCL2-associated athanogene 2	2.98812e-05	0	0	upregulated
209454_s_at	6p21.2	TEAD3	TEA domain family member 3	0.00102317	0	downregulated	0
209463_s_at	1p35.3	TAF12	TAF12 RNA polymerase II, TATA box binding protein (TBP)-associated factor, 20kDa	0.000641483	upregulated	upregulated	upregulated
209464_at	17p13.1	AURKB	aurora kinase B	0.000652292	0	upregulated	upregulated
209493_at	5p13.3	PDZD2	PDZ domain containing 2	0.00468643	0	downregulated	downregulated
209567_at	8q13.1	RRS1	RRS1 ribosome biogenesis regulator homolog (S. cerevisiae)	2.95852e-07	0	upregulated	0
209598_at	8p21.2	PNMA2	paraneoplastic antigen MA2	0.000143363	0	downregulated	downregulated
209646_x_at	9p11.1	ALDH1B1	aldehyde dehydrogenase 1 family, member B1	0.000498919	0	0	downregulated
209679_s_at	12q13.13	LOC57228	small trans-membrane and glycosylated protein	6.32148e-06	0	upregulated	0
209716_at	1p21-p13	CSF1	colony stimulating factor 1 (macrophage)	0.000591087	0	downregulated	0
209725_at	12q23	UTP20	UTP20, small subunit (SSU) processome component, homolog (yeast)	0.0125867	0	0	upregulated
209741_x_at	15q24	SCAPER	S phase cyclin A-associated protein in the ER	0.00875408	0	downregulated	0
209758_s_at	12p13.1-p12.3	MFAP5	microfibrillar associated protein 5	0.000263085	upregulated	upregulated	upregulated
209762_x_at	2q37.1	SP110	SP110 nuclear body protein	5.12269e-05	0	downregulated	downregulated
209774_x_at	4q21	CXCL2	chemokine (C-X-C motif) ligand 2	0.000925368	0	upregulated	upregulated
209800_at	17q12-q21	KRT16	keratin 16	0.00092784	0	upregulated	0
209806_at	6p21.33	HIST1H2BK	histone cluster 1, H2bk	1.63952e-06	0	0	upregulated
209815_at	9q22.3	PTCH1	patched homolog 1 (Drosophila)	0.00419407	0	0	upregulated
209839_at	1q24.3	DNM3	dynamin 3	0.000891689	0	downregulated	0
209863_s_at	3q28	TP63	tumor protein p63	1.10893e-05	0	downregulated	downregulated
209864_at	10q24.1	FRAT2	frequently rearranged in advanced T-cell lymphomas 2	4.65853e-06	0	upregulated	upregulated
209897_s_at	4p15.2	SLIT2	slit homolog 2 (Drosophila)	0.00700495	0	0	upregulated
209909_s_at	1q41	TGFB2	transforming growth factor, beta 2	1.76447e-06	0	downregulated	downregulated
209911_x_at	6p21.3	HIST1H2BD	histone cluster 1, H2bd	0.000526301	0	upregulated	upregulated
209953_s_at	19p13.2	CDC37	cell division cycle 37 homolog (S. cerevisiae)	0.00281462	0	upregulated	upregulated
209969_s_at	2q32.2	STAT1	signal transducer and activator of transcription 1, 91kDa	3.16445e-08	0	downregulated	downregulated
209971_x_at	7p22	JTV1	JTV1 gene	1.24925e-05	0	upregulated	upregulated
210004_at	12p13.2-p12.3	OLR1	oxidized low density lipoprotein (lectin-like) receptor 1	0.00854487	0	0	downregulated
210008_s_at	19q13.1-q13.2	MRPS12	mitochondrial ribosomal protein S12	0.000195619	0	upregulated	upregulated
210096_at	1p34-p12	CYP4B1	cytochrome P450, family 4, subfamily B, polypeptide 1	2.92734e-05	0	0	downregulated
210118_s_at	2q14	IL1A	interleukin 1, alpha	1.30038e-05	upregulated	0	downregulated
210143_at	4q33	ANXA10	annexin A10	0.0079784	0	upregulated	upregulated
210178_x_at	1p36.11	FUSIP1	FUS interacting protein (serine/arginine-rich) 1	1.30987e-05	upregulated	upregulated	upregulated
210186_s_at	20p13	FKBP1A	FK506 binding protein 1A, 12kDa	0.000184864	upregulated	upregulated	upregulated
210213_s_at	20q12	EIF6	eukaryotic translation initiation factor 6	0.000357011	0	upregulated	upregulated
210224_at	1q25.3	MR1	major histocompatibility complex, class I-related	0.00109539	0	downregulated	downregulated
210229_s_at	5q31.1	CSF2	colony stimulating factor 2 (granulocyte-macrophage)	3.16445e-08	upregulated	upregulated	upregulated
210306_at	20q13.12	L3MBTL	l(3)mbt-like (Drosophila)	2.45307e-06	downregulated	0	0
210334_x_at	17q25	BIRC5	baculoviral IAP repeat-containing 5	0.00013147	upregulated	upregulated	upregulated
210335_at	12q21.31	RASSF9	Ras association (RalGDS/AF-6) domain family (N-terminal) member 9	1.14681e-05	0	upregulated	upregulated
210337_s_at	17q12-q21	ACLY	ATP citrate lyase	0.000737958	0	0	upregulated
210338_s_at	11q24.1	HSPA8	heat shock 70kDa protein 8	1.63677e-06	downregulated	upregulated	upregulated
210361_s_at	4q28	ELF2	E74-like factor 2 (ets domain transcription factor)	0.00237634	0	upregulated	upregulated
210372_s_at	6q22-q23	TPD52L1	tumor protein D52-like 1	0.000843486	upregulated	upregulated	upregulated
210502_s_at	1p32	PPIE	peptidylprolyl isomerase E (cyclophilin E)	0.00380273	upregulated	upregulated	upregulated
210513_s_at	6p12	VEGFA	vascular endothelial growth factor A	8.68406e-05	upregulated	upregulated	0
210519_s_at	16q22.1	NQO1	NAD(P)H dehydrogenase, quinone 1	0.000266592	0	upregulated	upregulated
210524_x_at	NA	NA	NA	7.5219e-07	upregulated	upregulated	upregulated
210530_s_at	12q22	NR2C1	nuclear receptor subfamily 2, group C, member 1	0.0132557	0	downregulated	0
210534_s_at	17p11.2	B9D1	B9 protein domain 1	0.00324155	upregulated	upregulated	0
210541_s_at	6p22	TRIM27	tripartite motif-containing 27	0.00120729	0	upregulated	upregulated
210544_s_at	17p11.2	ALDH3A2	aldehyde dehydrogenase 3 family, member A2	0.00289563	0	downregulated	0
210594_x_at	1q24.2	MPZL1	myelin protein zero-like 1	0.00221091	0	upregulated	upregulated
210649_s_at	1p35.3	ARID1A	AT rich interactive domain 1A (SWI-like)	0.0225074	downregulated	0	0
210655_s_at	17p11	FOXO3B	forkhead box O3B pseudogene	0.0198955	0	upregulated	upregulated
210688_s_at	11q13.1-q13.2	CPT1A	carnitine palmitoyltransferase 1A (liver)	0.000793406	0	0	upregulated
210692_s_at	11q11	SLC43A3	solute carrier family 43, member 3	1.14681e-05	upregulated	upregulated	upregulated
210734_x_at	14q23	MAX	MYC associated factor X	0.000502585	upregulated	upregulated	upregulated
210754_s_at	8q13	LYN	v-yes-1 Yamaguchi sarcoma viral related oncogene homolog	0.000221275	0	downregulated	downregulated
210761_s_at	17q12	GRB7	growth factor receptor-bound protein 7	0.00158547	0	0	upregulated
210802_s_at	5q11-q14	DIMT1L	DIM1 dimethyladenosine transferase 1-like (S. cerevisiae)	0.000140729	0	upregulated	0
210916_s_at	11p13	CD44	CD44 molecule (Indian blood group)	0.000526301	0	upregulated	upregulated
210974_s_at	19p13.3	AP3D1	adaptor-related protein complex 3, delta 1 subunit	0.00830695	0	0	upregulated
210978_s_at	1q21-q25	TAGLN2	transgelin 2	0.0053144	upregulated	upregulated	upregulated
210983_s_at	7q21.3-q22.1	MCM7	minichromosome maintenance complex component 7	0.00336982	0	upregulated	upregulated
211085_s_at	20q11.2-q13.2	STK4	serine/threonine kinase 4	0.0232462	upregulated	0	0
211105_s_at	18q23	NFATC1	nuclear factor of activated T-cells, cytoplasmic, calcineurin-dependent 1	0.000380688	0	downregulated	downregulated
211194_s_at	3q28	TP63	tumor protein p63	0.00277276	0	downregulated	downregulated
211255_x_at	1q23.3	DEDD	death effector domain containing	0.0255749	upregulated	upregulated	upregulated
211343_s_at	10q22	COL13A1	collagen, type XIII, alpha 1	9.10328e-05	0	0	downregulated
211363_s_at	9p21	MTAP	methylthioadenosine phosphorylase	0.000114421	upregulated	upregulated	upregulated
211368_s_at	11q23	CASP1	caspase 1, apoptosis-related cysteine peptidase (interleukin 1, beta, convertase)	0.0207239	0	0	downregulated
211372_s_at	2q12-q22	IL1R2	interleukin 1 receptor, type II	3.16445e-08	upregulated	upregulated	upregulated
211456_x_at	1q43	MT1P2	metallothionein 1 pseudogene 2	3.48838e-07	0	upregulated	upregulated
211458_s_at	15q26.1	GABARAPL3	GABA(A) receptors associated protein like 3 (pseudogene)	5.41326e-05	0	downregulated	downregulated
211506_s_at	4q13-q21	IL8	interleukin 8	0.000200495	upregulated	upregulated	upregulated
211518_s_at	14q22-q23	BMP4	bone morphogenetic protein 4	0.000852179	0	upregulated	upregulated
211527_x_at	6p12	VEGFA	vascular endothelial growth factor A	0.000236639	upregulated	upregulated	0
211530_x_at	6p21.3	HLA-G	major histocompatibility complex, class I, G	0.023234	0	upregulated	upregulated
211622_s_at	12q13	ARF3	ADP-ribosylation factor 3	0.0266495	0	upregulated	0
211653_x_at	10p15-p14	AKR1C2	aldo-keto reductase family 1, member C2 (dihydrodiol dehydrogenase 2; bile acid binding protein; 3-alpha hydroxysteroid dehydrogenase, type III)	0.000136122	0	upregulated	upregulated
211672_s_at	3p25.3	ARPC4	actin related protein 2/3 complex, subunit 4, 20kDa	0.00234142	upregulated	upregulated	upregulated
211778_s_at	20pter-q11.23	OVOL2	ovo-like 2 (Drosophila)	0.00447741	0	0	upregulated
211796_s_at	12q13.2	IL23A	interleukin 23, alpha subunit p19	8.57001e-06	0	0	upregulated
211966_at	13q34	COL4A2	collagen, type IV, alpha 2	0.0217697	0	0	upregulated
212002_at	1p36.13	C1orf144	chromosome 1 open reading frame 144	0.0110418	upregulated	upregulated	upregulated
212003_at	1p36.13	C1orf144	chromosome 1 open reading frame 144	0.000294719	upregulated	upregulated	upregulated
212007_at	2q21.3	UBXN4	UBX domain protein 4	0.000374693	upregulated	upregulated	upregulated
212009_s_at	11q13	STIP1	stress-induced-phosphoprotein 1	0.000375957	0	upregulated	upregulated
212027_at	14q24.3	RBM25	RNA binding motif protein 25	0.00776994	0	upregulated	upregulated
212028_at	14q24.3	RBM25	RNA binding motif protein 25	0.000152669	upregulated	upregulated	upregulated
212056_at	16q24.1	KIAA0182	KIAA0182	0.00180529	0	downregulated	0
212057_at	16q24.1	KIAA0182	KIAA0182	0.000241515	0	downregulated	0
212062_at	20q13.2	ATP9A	ATPase, class II, type 9A	3.79352e-08	downregulated	downregulated	downregulated
212095_s_at	8p22	MTUS1	mitochondrial tumor suppressor 1	0.0327257	upregulated	0	0
212125_at	22q13	RANGAP1	Ran GTPase activating protein 1	0.00163801	0	upregulated	0
212171_x_at	6p12	VEGFA	vascular endothelial growth factor A	0.000488787	upregulated	upregulated	0
212184_s_at	6q25.1-q25.3	MAP3K7IP2	mitogen-activated protein kinase kinase kinase 7 interacting protein 2	0.00464878	0	downregulated	0
212185_x_at	16q13	MT2A	metallothionein 2A	1.2556e-06	0	upregulated	upregulated
212190_at	2q33-q35	SERPINE2	serpin peptidase inhibitor, clade E (nexin, plasminogen activator inhibitor type 1), member 2	4.28571e-07	0	0	upregulated
212221_x_at	Xq28	IDS	iduronate 2-sulfatase	3.57364e-05	downregulated	downregulated	downregulated
212263_at	6q26	QKI	quaking homolog, KH domain RNA binding (mouse)	0.000281584	upregulated	upregulated	0
212279_at	17q11.2	TMEM97	transmembrane protein 97	0.000174888	upregulated	upregulated	upregulated
212303_x_at	19p13.3	KHSRP	KH-type splicing regulatory protein	0.00659825	0	0	upregulated
212321_at	10q21	SGPL1	sphingosine-1-phosphate lyase 1	5.71082e-05	0	downregulated	downregulated
212337_at	22q12.2	TUG1	taurine upregulated 1 (non-protein coding)	0.00279589	0	downregulated	downregulated
212357_at	11q13.4	FAM168A	family with sequence similarity 168, member A	0.000308941	0	downregulated	downregulated
212374_at	15q22	FEM1B	fem-1 homolog b (C. elegans)	6.56911e-05	0	downregulated	0
212386_at	18q21.1	TCF4	transcription factor 4	0.0156845	0	downregulated	0
212406_s_at	20q13.33	PCMTD2	protein-L-isoaspartate (D-aspartate) O-methyltransferase domain containing 2	2.78224e-05	0	downregulated	downregulated
212411_at	2q21.1	IMP4	IMP4, U3 small nucleolar ribonucleoprotein, homolog (yeast)	0.000122699	0	upregulated	upregulated
212414_s_at	Xq24	SEPT6	septin 6	0.000941464	0	downregulated	downregulated
212422_at	10q24.33	PDCD11	programmed cell death 11	0.00174776	0	upregulated	0
212434_at	4p16	GRPEL1	GrpE-like 1, mitochondrial (E. coli)	3.81784e-05	0	0	downregulated
212445_s_at	18q21	NEDD4L	neural precursor cell expressed, developmentally down-regulated 4-like	2.37301e-06	0	downregulated	downregulated
212473_s_at	11p15.3	MICAL2	microtubule associated monoxygenase, calponin and LIM domain containing 2	5.13522e-06	0	0	downregulated
212487_at	17q21.31	GPATCH8	G patch domain containing 8	0.0131229	0	0	downregulated
212497_at	14q22.3	MAPK1IP1L	mitogen-activated protein kinase 1 interacting protein 1-like	0.0140832	0	0	upregulated
212527_at	22q13.2	PPPDE2	PPPDE peptidase domain containing 2	0.00365716	0	upregulated	0
212563_at	8q24.3	BOP1	block of proliferation 1	0.000282489	0	upregulated	upregulated
212595_s_at	12q12	DAZAP2	DAZ associated protein 2	0.0235123	0	0	upregulated
212614_at	10q21.2	ARID5B	AT rich interactive domain 5B (MRF1-like)	4.83754e-06	0	downregulated	0
212641_at	6q23-q24	HIVEP2	human immunodeficiency virus type I enhancer binding protein 2	0.000354046	0	downregulated	downregulated
212642_s_at	6q23-q24	HIVEP2	human immunodeficiency virus type I enhancer binding protein 2	0.00155733	0	downregulated	downregulated
212657_s_at	2q12	IL1R1	interleukin 1 receptor	0.000119442	0	0	downregulated
212689_s_at	2p11.2	JMJD1A	jumonji domain containing 1A	4.57959e-05	0	0	upregulated
212697_at	17q21.31	FAM134C	family with sequence similarity 134, member C	5.15306e-05	0	downregulated	0
212761_at	10q25.3	TCF7L2	transcription factor 7-like 2 (T-cell specific, HMG-box)	0.00311382	downregulated	downregulated	0
212822_at	3q21.2	HEG1	HEG homolog 1 (zebrafish)	0.00306158	0	downregulated	downregulated
212830_at	9q32-q33.3	MEGF9	multiple EGF-like-domains 9	0.000126386	0	0	upregulated
212845_at	14q22.2	SAMD4A	sterile alpha motif domain containing 4A	2.7466e-06	0	downregulated	downregulated
212859_x_at	16q13	MT1E	metallothionein 1E	4.03953e-11	upregulated	upregulated	upregulated
212867_at	NA	NA	NA	0.0170023	0	downregulated	0
212879_x_at	19p13.3	PIAS4	protein inhibitor of activated STAT, 4	0.0495314	0	0	upregulated
212902_at	5q31.1	SEC24A	SEC24 family, member A (S. cerevisiae)	0.0176332	0	downregulated	downregulated
212907_at	1q32-q41	SLC30A1	solute carrier family 30 (zinc transporter), member 1	3.56819e-06	0	0	downregulated
212909_at	2q21.2	LYPD1	LY6/PLAUR domain containing 1	5.63125e-05	downregulated	0	upregulated
212912_at	6q27	RPS6KA2	ribosomal protein S6 kinase, 90kDa, polypeptide 2	4.17387e-05	downregulated	downregulated	downregulated
212956_at	4q31.21	TBC1D9	TBC1 domain family, member 9 (with GRAM domain)	3.35194e-05	0	0	upregulated
212964_at	22q11.21	HIC2	hypermethylated in cancer 2	0.000188851	0	upregulated	upregulated
212975_at	8q24.3	DENND3	DENN/MADD domain containing 3	0.000308287	0	downregulated	downregulated
212993_at	9q34.3	NACC2	NACC family member 2, BEN and BTB (POZ) domain containing	1.95765e-05	downregulated	downregulated	upregulated
213069_at	3q21.2	HEG1	HEG homolog 1 (zebrafish)	1.2258e-06	0	downregulated	downregulated
213073_at	14q24.1	ZFYVE26	zinc finger, FYVE domain containing 26	1.22404e-05	downregulated	downregulated	0
213085_s_at	5q35.1	WWC1	WW and C2 domain containing 1	1.71145e-05	0	downregulated	downregulated
213142_x_at	7q11.23	PION	pigeon homolog (Drosophila)	0.0310735	0	0	downregulated
213169_at	5p15.2	SEMA5A	sema domain, seven thrombospondin repeats (type 1 and type 1-like), transmembrane domain (TM) and short cytoplasmic domain, (semaphorin) 5A	0.0011862	0	0	upregulated
213175_s_at	20p13	SNRPB	small nuclear ribonucleoprotein polypeptides B and B1	0.00137849	upregulated	upregulated	upregulated
213189_at	3q11.2	CRYBG3	beta-gamma crystallin domain containing 3	0.00548995	0	upregulated	0
213227_at	4q26	PGRMC2	progesterone receptor membrane component 2	5.61505e-06	0	downregulated	downregulated
213235_at	16p12.3	C16orf88	chromosome 16 open reading frame 88	0.0146103	0	upregulated	upregulated
213240_s_at	12q12-q13	KRT4	keratin 4	0.0411945	0	0	downregulated
213283_s_at	14q11.1-q12	SALL2	sal-like 2 (Drosophila)	6.16256e-05	0	downregulated	upregulated
213293_s_at	11p15	TRIM22	tripartite motif-containing 22	1.5292e-07	0	0	downregulated
213336_at	7q11.23	BAZ1B	bromodomain adjacent to zinc finger domain, 1B	0.0104878	0	upregulated	upregulated
213349_at	3q21.3	TMCC1	transmembrane and coiled-coil domain family 1	0.000153799	0	downregulated	downregulated
213350_at	19q13.3	RPS11	ribosomal protein S11	0.00247999	downregulated	downregulated	downregulated
213361_at	9q22.33	TDRD7	tudor domain containing 7	0.000108234	0	downregulated	downregulated
213373_s_at	2q33-q34	CASP8	caspase 8, apoptosis-related cysteine peptidase	0.00173938	0	0	downregulated
213375_s_at	13q12-q13	N4BP2L1	NEDD4 binding protein 2-like 1	3.16445e-08	0	0	upregulated
213455_at	4p14	FAM114A1	family with sequence similarity 114, member A1	1.78597e-05	0	downregulated	downregulated
213476_x_at	16q24.3	TUBB3	tubulin, beta 3	0.000228578	0	upregulated	upregulated
213517_at	12q13.12-q13.13	PCBP2	poly(rC) binding protein 2	0.0413787	0	upregulated	0
213524_s_at	1q32.2	G0S2	G0/G1switch 2	5.48088e-06	upregulated	upregulated	0
213572_s_at	6p25	SERPINB1	serpin peptidase inhibitor, clade B (ovalbumin), member 1	0.00141113	0	downregulated	downregulated
213596_at	11q22.2-q22.3	CASP4	caspase 4, apoptosis-related cysteine peptidase	0.0499129	0	0	upregulated
213607_x_at	1p36.33-p36.21	NADK	NAD kinase	0.0131351	0	upregulated	0
213624_at	6q22.31	SMPDL3A	sphingomyelin phosphodiesterase, acid-like 3A	8.1428e-05	0	0	upregulated
213629_x_at	16q13	MT1F	metallothionein 1F	3.16445e-08	upregulated	upregulated	upregulated
213668_s_at	6p22.3	SOX4	SRY (sex determining region Y)-box 4	0.0367618	upregulated	0	0
213671_s_at	12q13.2	MARS	methionyl-tRNA synthetase	7.30078e-05	0	upregulated	0
213680_at	12q12-q13	KRT6B	keratin 6B	0.000301536	0	upregulated	0
213689_x_at	1p22.1	RPL5	ribosomal protein L5	0.000555395	0	downregulated	downregulated
213710_s_at	NA	NA	NA	0.00168721	0	upregulated	upregulated
213721_at	3q26.3-q27	SOX2	SRY (sex determining region Y)-box 2	0.00893176	0	upregulated	upregulated
213753_x_at	17p13-p12	EIF5A	eukaryotic translation initiation factor 5A	0.00927811	0	upregulated	upregulated
213760_s_at	4q31.1	ZNF330	zinc finger protein 330	0.000142151	0	upregulated	0
213802_at	NA	NA	NA	1.30987e-05	0	downregulated	downregulated
213813_x_at	NA	NA	NA	0.000262622	0	upregulated	upregulated
213844_at	7p15-p14	HOXA5	homeobox A5	1.2813e-05	0	upregulated	upregulated
213850_s_at	12q12-q13.11	SFRS2IP	splicing factor, arginine/serine-rich 2, interacting protein	0.0129698	upregulated	upregulated	upregulated
213865_at	3	DCBLD2	discoidin, CUB and LCCL domain containing 2	0.000142895	upregulated	upregulated	upregulated
213887_s_at	19p13.3	POLR2E	polymerase (RNA) II (DNA directed) polypeptide E, 25kDa	0.00613998	upregulated	upregulated	upregulated
213891_s_at	18q21.1	TCF4	transcription factor 4	0.00198987	0	downregulated	0
213901_x_at	22q13.1	RBM9	RNA binding motif protein 9	0.00345274	upregulated	upregulated	upregulated
213912_at	12q14.3	TBC1D30	TBC1 domain family, member 30	1.44756e-05	0	upregulated	upregulated
213913_s_at	12q14.3	TBC1D30	TBC1 domain family, member 30	9.32403e-06	0	upregulated	upregulated
213927_at	14q24.3-q31	MAP3K9	mitogen-activated protein kinase kinase kinase 9	1.30987e-05	0	downregulated	downregulated
213931_at	2p25	ID2	inhibitor of DNA binding 2, dominant negative helix-loop-helix protein	1.14765e-05	downregulated	downregulated	downregulated
213937_s_at	Xp11.23	FTSJ1	FtsJ homolog 1 (E. coli)	0.00145547	upregulated	upregulated	upregulated
214001_x_at	6p21.31	RPS10	ribosomal protein S10	0.00344563	0	upregulated	upregulated
214011_s_at	5q35.2	NOP16	NOP16 nucleolar protein homolog (yeast)	1.38168e-06	0	upregulated	0
214041_x_at	2q35	RPL37A	ribosomal protein L37a	0.000710723	0	upregulated	upregulated
214051_at	Xq22.2	TMSB15B	thymosin beta 15B	1.16974e-05	downregulated	downregulated	downregulated
214056_at	1q21	MCL1	myeloid cell leukemia sequence 1 (BCL2-related)	0.0023562	upregulated	0	downregulated
214058_at	1p34.2	MYCL1	v-myc myelocytomatosis viral oncogene homolog 1, lung carcinoma derived (avian)	5.71049e-05	0	0	upregulated
214062_x_at	19q13.1	NFKBIB	nuclear factor of kappa light polypeptide gene enhancer in B-cells inhibitor, beta	0.00234964	upregulated	upregulated	upregulated
214079_at	14q11.2	DHRS2	dehydrogenase/reductase (SDR family) member 2	7.01118e-07	downregulated	0	upregulated
214119_s_at	20p13	FKBP1A	FK506 binding protein 1A, 12kDa	0.000782923	0	0	upregulated
214149_s_at	5q35.2	ATP6V0E1	ATPase, H+ transporting, lysosomal 9kDa, V0 subunit e1	0.000970195	0	upregulated	upregulated
214168_s_at	15q13	TJP1	tight junction protein 1 (zona occludens 1)	0.000757232	0	downregulated	downregulated
214172_x_at	3q22	RYK	RYK receptor-like tyrosine kinase	0.000480257	0	downregulated	downregulated
214239_x_at	17q12	CISD3	CDGSH iron sulfur domain 3	3.6254e-05	downregulated	downregulated	downregulated
214240_at	11q13.2	GAL	galanin prepropeptide	2.46841e-07	0	upregulated	upregulated
214246_x_at	17p13.2	MINK1	misshapen-like kinase 1 (zebrafish)	0.00470985	0	downregulated	downregulated
214290_s_at	1q21.2	HIST2H2AA3	histone cluster 2, H2aa3	0.00992091	0	0	upregulated
214297_at	15q24.2	CSPG4	chondroitin sulfate proteoglycan 4	1.10893e-05	downregulated	0	0
214305_s_at	2q33.1	SF3B1	splicing factor 3b, subunit 1, 155kDa	0.0188251	upregulated	0	upregulated
214349_at	NA	NA	NA	0.000145829	upregulated	upregulated	upregulated
214359_s_at	6p12	HSP90AB1	heat shock protein 90kDa alpha (cytosolic), class B member 1	0.000684901	0	upregulated	0
214374_s_at	12p11.23-p11.22	PPFIBP1	PTPRF interacting protein, binding protein 1 (liprin beta 1)	0.0372358	upregulated	0	0
214427_at	12p13	NOP2	NOP2 nucleolar protein homolog (yeast)	7.45438e-05	0	upregulated	0
214446_at	5q15	ELL2	elongation factor, RNA polymerase II, 2	0.00640588	0	0	downregulated
214464_at	1q42.11	CDC42BPA	CDC42 binding protein kinase alpha (DMPK-like)	0.000539898	upregulated	upregulated	upregulated
214484_s_at	9p13.3	SIGMAR1	sigma non-opioid intracellular receptor 1	0.00127927	upregulated	upregulated	upregulated
214500_at	5q31.3-q32	H2AFY	H2A histone family, member Y	0.0218148	0	upregulated	upregulated
214507_s_at	9q34	EXOSC2	exosome component 2	0.000335615	0	upregulated	upregulated
214519_s_at	9p24.1	RLN2	relaxin 2	0.0179924	0	downregulated	downregulated
214527_s_at	Xp11.23	PQBP1	polyglutamine binding protein 1	0.0363204	0	0	upregulated
214543_x_at	6q26	QKI	quaking homolog, KH domain RNA binding (mouse)	9.33374e-05	upregulated	upregulated	upregulated
214581_x_at	6p21.1-p12.2	TNFRSF21	tumor necrosis factor receptor superfamily, member 21	9.87986e-05	0	upregulated	0
214599_at	1q21	IVL	involucrin	1.35804e-05	0	downregulated	downregulated
214696_at	17p13.3	C17orf91	chromosome 17 open reading frame 91	6.1642e-06	0	downregulated	downregulated
214805_at	17p13	EIF4A1	eukaryotic translation initiation factor 4A, isoform 1	0.00167943	upregulated	upregulated	0
214806_at	12p11.2-p11.1	BICD1	bicaudal D homolog 1 (Drosophila)	0.00130196	0	upregulated	0
214934_at	18q23	ATP9B	ATPase, class II, type 9B	0.00011307	downregulated	downregulated	downregulated
214941_s_at	2q23.3	PRPF40A	PRP40 pre-mRNA processing factor 40 homolog A (S. cerevisiae)	4.18857e-06	upregulated	upregulated	upregulated
214943_s_at	1q42.3	RBM34	RNA binding motif protein 34	2.31943e-05	upregulated	upregulated	upregulated
214992_s_at	19p13.2	DNASE2	deoxyribonuclease II, lysosomal	0.0380192	0	0	upregulated
215071_s_at	6p21.3	HIST1H2AC	histone cluster 1, H2ac	7.37633e-06	0	upregulated	upregulated
215073_s_at	15q26	NR2F2	nuclear receptor subfamily 2, group F, member 2	0.000518674	downregulated	0	downregulated
215177_s_at	2q31.1	ITGA6	integrin, alpha 6	0.000282489	0	0	downregulated
215228_at	1p12-p11	NHLH2	nescient helix loop helix 2	2.85837e-05	0	downregulated	0
215236_s_at	11q14	PICALM	phosphatidylinositol binding clathrin assembly protein	0.0443746	0	0	downregulated
215294_s_at	Xq25	SMARCA1	SWI/SNF related, matrix associated, actin dependent regulator of chromatin, subfamily a, member 1	0.00386171	0	downregulated	downregulated
215329_s_at	1p36.33	CDC2L2	cell division cycle 2-like 2 (PITSLRE proteins)	0.0130201	0	upregulated	upregulated
215359_x_at	19p13.2	ZNF44	zinc finger protein 44	0.00105499	0	upregulated	upregulated
215440_s_at	Xq22.1-q22.3	BEX4	brain expressed, X-linked 4	0.000460039	0	downregulated	0
215446_s_at	5q23.2	LOX	lysyl oxidase	0.0131229	0	downregulated	downregulated
215465_at	2q34	ABCA12	ATP-binding cassette, sub-family A (ABC1), member 12	6.75665e-05	0	0	downregulated
215495_s_at	14q22.2	SAMD4A	sterile alpha motif domain containing 4A	0.00711695	0	0	downregulated
215501_s_at	1q41	DUSP10	dual specificity phosphatase 10	0.00014603	0	downregulated	downregulated
215631_s_at	11q13-q13.2	BRMS1	breast cancer metastasis suppressor 1	0.0033584	0	upregulated	upregulated
215704_at	1q21.3	FLG	filaggrin	0.000268575	0	0	downregulated
215723_s_at	3q26	PLD1	phospholipase D1, phosphatidylcholine-specific	8.35082e-05	downregulated	downregulated	downregulated
215728_s_at	1p36.31-p36.11	ACOT7	acyl-CoA thioesterase 7	0.000442021	0	upregulated	upregulated
215997_s_at	Xq23	CUL4B	cullin 4B	0.031659	0	downregulated	downregulated
216031_x_at	16p13.3	HN1L	hematological and neurological expressed 1-like	0.000387287	upregulated	upregulated	upregulated
216035_x_at	10q25.3	TCF7L2	transcription factor 7-like 2 (T-cell specific, HMG-box)	0.000735268	downregulated	downregulated	downregulated
216044_x_at	1p22.1	FAM69A	family with sequence similarity 69, member A	0.000458881	0	downregulated	downregulated
216080_s_at	11q12-q13.1	FADS3	fatty acid desaturase 3	0.00298188	upregulated	upregulated	upregulated
216088_s_at	20q13.33	PSMA7	proteasome (prosome, macropain) subunit, alpha type, 7	0.000495521	upregulated	upregulated	upregulated
216177_at	1q24.2	LOC391132	similar to hCG2041276	0.00470698	0	upregulated	upregulated
216248_s_at	2q22-q23	NR4A2	nuclear receptor subfamily 4, group A, member 2	7.42144e-06	0	upregulated	upregulated
216336_x_at	16q13	MT1E	metallothionein 1E	9.0564e-07	0	upregulated	upregulated
216483_s_at	19p13.3	C19orf10	chromosome 19 open reading frame 10	0.00309035	0	upregulated	upregulated
216508_x_at	22q12.1	HMGB1L10	high-mobility group box 1-like 10	0.000271536	upregulated	upregulated	upregulated
216521_s_at	Xq28	BRCC3	BRCA1/BRCA2-containing complex, subunit 3	0.000808114	upregulated	upregulated	upregulated
216591_s_at	1q23.3	SDHC	succinate dehydrogenase complex, subunit C, integral membrane protein, 15kDa	0.000454083	upregulated	upregulated	upregulated
216594_x_at	10p15-p14	AKR1C1	aldo-keto reductase family 1, member C1 (dihydrodiol dehydrogenase 1; 20-alpha (3-alpha)-hydroxysteroid dehydrogenase)	0.00388477	0	0	upregulated
216602_s_at	19p13.2	FARSA	phenylalanyl-tRNA synthetase, alpha subunit	0.0003361	upregulated	upregulated	upregulated
216804_s_at	4q22	PDLIM5	PDZ and LIM domain 5	3.10553e-05	0	0	downregulated
216913_s_at	10q24.1	RRP12	ribosomal RNA processing 12 homolog (S. cerevisiae)	1.23492e-05	0	upregulated	upregulated
217047_s_at	4q22.1	FAM13A	family with sequence similarity 13, member A	0.000359817	0	downregulated	0
217165_x_at	16q13	MT1F	metallothionein 1F	9.46752e-08	0	upregulated	upregulated
217168_s_at	16q12.2-q13	HERPUD1	homocysteine-inducible, endoplasmic reticulum stress-inducible, ubiquitin-like domain member 1	2.72965e-05	upregulated	upregulated	0
217185_s_at	6q21	ZNF259P	zinc finger protein 259, pseudogene	0.000770265	0	upregulated	0
217272_s_at	18q21.3-q22	SERPINB13	serpin peptidase inhibitor, clade B (ovalbumin), member 13	0.000904171	0	0	downregulated
217294_s_at	1p36.3-p36.2	ENO1	enolase 1, (alpha)	0.000161022	upregulated	upregulated	upregulated
217364_x_at	15q15.3	EIF3J	eukaryotic translation initiation factor 3, subunit J	5.17753e-05	0	upregulated	upregulated
217370_x_at	16p11.2	FUS	fusion (involved in t(12;16) in malignant liposarcoma)	0.0104798	0	upregulated	upregulated
217546_at	16q13	MT1M	metallothionein 1M	1.49489e-10	upregulated	upregulated	upregulated
217645_at	14q24.2	COX16	COX16 cytochrome c oxidase assembly homolog (S. cerevisiae)	0.00349147	0	downregulated	downregulated
217651_at	NA	NA	NA	0.000489696	downregulated	downregulated	downregulated
217739_s_at	7q22.2	NAMPT	nicotinamide phosphoribosyltransferase	0.0160594	0	0	downregulated
217782_s_at	17q25.3	GPS1	G protein pathway suppressor 1	0.020856	0	upregulated	0
217783_s_at	2p23.1	YPEL5	yippee-like 5 (Drosophila)	3.55504e-05	0	downregulated	0
217790_s_at	3q25.31	SSR3	signal sequence receptor, gamma (translocon-associated protein gamma)	0.00921547	0	0	downregulated
217799_x_at	7q32	UBE2H	ubiquitin-conjugating enzyme E2H (UBC8 homolog, yeast)	0.00130012	0	0	downregulated
217831_s_at	20p13	NSFL1C	NSFL1 (p97) cofactor (p47)	0.00607212	upregulated	upregulated	upregulated
217847_s_at	1p34.3	THRAP3	thyroid hormone receptor associated protein 3	0.00141113	0	upregulated	0
217853_at	7p12.3	TNS3	tensin 3	2.18274e-05	0	downregulated	downregulated
217854_s_at	19p13.3	POLR2E	polymerase (RNA) II (DNA directed) polypeptide E, 25kDa	0.0250951	0	upregulated	upregulated
217873_at	2q37.1	CAB39	calcium binding protein 39	0.0151584	0	0	downregulated
217892_s_at	12q13	LIMA1	LIM domain and actin binding 1	0.00839031	0	0	downregulated
217909_s_at	17q21.1	MLX	MAX-like protein X	0.00304195	0	upregulated	upregulated
217930_s_at	11p15.5	TOLLIP	toll interacting protein	0.0497142	0	upregulated	0
217932_at	17q25	MRPS7	mitochondrial ribosomal protein S7	0.000372857	0	upregulated	upregulated
217966_s_at	1q25	FAM129A	family with sequence similarity 129, member A	0.0385424	upregulated	0	upregulated
217973_at	17q25.3	DCXR	dicarbonyl/L-xylulose reductase	0.0352096	0	0	upregulated
217991_x_at	1p32.3	SSBP3	single stranded DNA binding protein 3	7.55673e-05	downregulated	0	0
217997_at	12q15	PHLDA1	pleckstrin homology-like domain, family A, member 1	2.88242e-05	upregulated	upregulated	downregulated
217998_at	12q15	PHLDA1	pleckstrin homology-like domain, family A, member 1	4.15365e-05	upregulated	0	downregulated
217999_s_at	12q15	PHLDA1	pleckstrin homology-like domain, family A, member 1	1.15999e-06	upregulated	downregulated	downregulated
218028_at	1p34.2	ELOVL1	elongation of very long chain fatty acids (FEN1/Elo2, SUR4/Elo3, yeast)-like 1	0.000936476	upregulated	upregulated	upregulated
218031_s_at	14q31.3	FOXN3	forkhead box N3	0.000300865	0	downregulated	downregulated
218119_at	10q11.21-q11.23	TIMM23	translocase of inner mitochondrial membrane 23 homolog (yeast)	0.00799959	0	0	upregulated
218120_s_at	16p13.3	HMOX2	heme oxygenase (decycling) 2	9.14243e-05	0	upregulated	0
218145_at	20p13-p12.2	TRIB3	tribbles homolog 3 (Drosophila)	3.62641e-05	upregulated	upregulated	0
218184_at	6q25-q26	TULP4	tubby like protein 4	0.000463248	0	downregulated	downregulated
218204_s_at	3p21.31	FYCO1	FYVE and coiled-coil domain containing 1	2.70904e-05	0	downregulated	downregulated
218218_at	12q24.1	APPL2	adaptor protein, phosphotyrosine interaction, PH domain and leucine zipper containing 2	0.00932424	0	0	downregulated
218221_at	1q21	ARNT	aryl hydrocarbon receptor nuclear translocator	6.98966e-05	0	downregulated	downregulated
218259_at	16p13.12	MKL2	MKL/myocardin-like 2	0.00258686	0	downregulated	0
218273_s_at	8q22.1	PPM2C	protein phosphatase 2C, magnesium-dependent, catalytic subunit	0.0168811	0	downregulated	downregulated
218285_s_at	4q24	BDH2	3-hydroxybutyrate dehydrogenase, type 2	8.17425e-06	0	0	downregulated
218292_s_at	7q36.1	PRKAG2	protein kinase, AMP-activated, gamma 2 non-catalytic subunit	0.000712381	0	0	downregulated
218296_x_at	1q22	MSTO1	misato homolog 1 (Drosophila)	0.000192562	0	upregulated	0
218305_at	14q12	IPO4	importin 4	0.000526301	0	0	upregulated
218324_s_at	12q13.12	SPATS2	spermatogenesis associated, serine-rich 2	2.13654e-05	downregulated	downregulated	downregulated
218330_s_at	11p15.1	NAV2	neuron navigator 2	0.00733969	0	downregulated	0
218344_s_at	1q32.2-q32.3	RCOR3	REST corepressor 3	0.0160877	0	downregulated	0
218346_s_at	6q21	SESN1	sestrin 1	4.78496e-07	0	upregulated	upregulated
218382_s_at	19q13.42	U2AF2	U2 small nuclear RNA auxiliary factor 2	0.00313838	0	upregulated	upregulated
218408_at	11q12.1-q12.3	TIMM10	translocase of inner mitochondrial membrane 10 homolog (yeast)	8.31176e-05	0	upregulated	0
218412_s_at	7q11.23	GTF2IRD1	GTF2I repeat domain containing 1	0.000265394	0	downregulated	downregulated
218418_s_at	19p13.2	KANK2	KN motif and ankyrin repeat domains 2	1.55223e-05	0	downregulated	0
218429_s_at	19p13.2	C19orf66	chromosome 19 open reading frame 66	0.000123686	0	downregulated	downregulated
218510_x_at	5p15.1	FAM134B	family with sequence similarity 134, member B	0.000874679	0	0	upregulated
218517_at	4q26-q27	PHF17	PHD finger protein 17	0.000171454	0	0	upregulated
218528_s_at	9p13	RNF38	ring finger protein 38	0.00021937	downregulated	downregulated	0
218553_s_at	19q13.11	KCTD15	potassium channel tetramerisation domain containing 15	0.00081852	0	upregulated	upregulated
218559_s_at	20q11.2-q13.1	MAFB	v-maf musculoaponeurotic fibrosarcoma oncogene homolog B (avian)	5.56459e-06	downregulated	0	0
218638_s_at	4p16.3	SPON2	spondin 2, extracellular matrix protein	2.16626e-05	0	upregulated	upregulated
218667_at	Xq13.1	PJA1	praja ring finger 1	5.85736e-05	0	downregulated	downregulated
218681_s_at	22q11.21	SDF2L1	stromal cell-derived factor 2-like 1	5.57047e-05	0	upregulated	upregulated
218748_s_at	14q23.1	EXOC5	exocyst complex component 5	0.0285742	0	0	downregulated
218764_at	14q22-q23	PRKCH	protein kinase C, eta	2.72535e-05	0	downregulated	downregulated
218786_at	12q22-q23.1	NT5DC3	5'-nucleotidase domain containing 3	5.82037e-05	0	downregulated	downregulated
218792_s_at	9q32	BSPRY	B-box and SPRY domain containing	0.000377159	0	downregulated	downregulated
218806_s_at	1p13.3	VAV3	vav 3 guanine nucleotide exchange factor	1.27019e-07	0	upregulated	upregulated
218807_at	1p13.3	VAV3	vav 3 guanine nucleotide exchange factor	3.46671e-08	0	upregulated	upregulated
218820_at	14q32.2	C14orf132	chromosome 14 open reading frame 132	6.00629e-06	0	downregulated	downregulated
218824_at	19q13.32	PNMAL1	PNMA-like 1	0.00105499	0	downregulated	0
218849_s_at	19q13.32	PPP1R13L	protein phosphatase 1, regulatory (inhibitor) subunit 13 like	0.00496242	0	downregulated	downregulated
218866_s_at	16p13.3	POLR3K	polymerase (RNA) III (DNA directed) polypeptide K, 12.3 kDa	2.61777e-05	0	upregulated	upregulated
218886_at	6p24.2	PAK1IP1	PAK1 interacting protein 1	0.000512751	upregulated	upregulated	0
218904_s_at	9q21.13	C9orf40	chromosome 9 open reading frame 40	0.00846401	0	upregulated	upregulated
218927_s_at	7p22	CHST12	carbohydrate (chondroitin 4) sulfotransferase 12	8.98038e-05	0	downregulated	0
218954_s_at	8p12	BRF2	BRF2, subunit of RNA polymerase III transcription initiation factor, BRF1-like	0.000514108	0	upregulated	upregulated
218963_s_at	17q21.2	KRT23	keratin 23 (histone deacetylase inducible)	0.00815831	0	0	downregulated
218983_at	12p13.31	C1RL	complement component 1, r subcomponent-like	0.00437308	0	0	downregulated
219006_at	6q16.1	C6orf66	chromosome 6 open reading frame 66	4.86242e-07	upregulated	upregulated	upregulated
219031_s_at	16q22.1	NIP7	nuclear import 7 homolog (S. cerevisiae)	1.23492e-05	0	upregulated	0
219050_s_at	11q13	ZNHIT2	zinc finger, HIT type 2	0.0168922	0	upregulated	0
219077_s_at	16q23.3-q24.1	WWOX	WW domain containing oxidoreductase	1.43571e-05	downregulated	downregulated	downregulated
219088_s_at	19q13.31	ZNF576	zinc finger protein 576	0.0142825	0	upregulated	upregulated
219110_at	4q25	GAR1	GAR1 ribonucleoprotein homolog (yeast)	3.10281e-05	0	upregulated	0
219131_at	1p36-p34.1	UBIAD1	UbiA prenyltransferase domain containing 1	8.85727e-05	0	upregulated	0
219158_s_at	4q31.1	NARG1	NMDA receptor regulated 1	0.00270911	upregulated	upregulated	0
219181_at	18q21.1	LIPG	lipase, endothelial	7.55673e-05	0	0	downregulated
219189_at	8q24.3	FBXL6	F-box and leucine-rich repeat protein 6	0.00183072	0	upregulated	upregulated
219209_at	2q24	IFIH1	interferon induced with helicase C domain 1	0.00037155	0	downregulated	0
219232_s_at	14q13.1	EGLN3	egl nine homolog 3 (C. elegans)	4.88049e-05	0	downregulated	downregulated
219235_s_at	1p35.3	PHACTR4	phosphatase and actin regulator 4	0.00624768	downregulated	downregulated	downregulated
219250_s_at	20p11	FLRT3	fibronectin leucine rich transmembrane protein 3	0.0499129	0	downregulated	0
219260_s_at	17p13.1	C17orf81	chromosome 17 open reading frame 81	0.00875408	0	upregulated	upregulated
219270_at	15q15.1	CHAC1	ChaC, cation transport regulator homolog 1 (E. coli)	7.51898e-07	upregulated	upregulated	0
219275_at	19q12-q13.1	PDCD5	programmed cell death 5	3.21185e-05	upregulated	upregulated	upregulated
219287_at	12q	KCNMB4	potassium large conductance calcium-activated channel, subfamily M, beta member 4	1.20176e-05	downregulated	downregulated	downregulated
219313_at	3q13.31	GRAMD1C	GRAM domain containing 1C	0.00469471	0	downregulated	0
219316_s_at	14q24.3	FLVCR2	feline leukemia virus subgroup C cellular receptor family, member 2	5.90273e-05	downregulated	0	0
219326_s_at	2p15	B3GNT2	UDP-GlcNAc:betaGal beta-1,3-N-acetylglucosaminyltransferase 2	0.0120874	0	downregulated	downregulated
219368_at	Xq13	NAP1L2	nucleosome assembly protein 1-like 2	0.0431995	0	0	upregulated
219371_s_at	19p13.13-p13.11	KLF2	Kruppel-like factor 2 (lung)	0.000117873	0	0	upregulated
219377_at	18q12.1	FAM59A	family with sequence similarity 59, member A	3.31735e-05	0	0	upregulated
219420_s_at	1p32.3	C1orf163	chromosome 1 open reading frame 163	0.00383111	0	upregulated	0
219433_at	Xp21.2-p11.4	BCOR	BCL6 co-repressor	2.67414e-06	0	upregulated	upregulated
219497_s_at	2p16.1	BCL11A	B-cell CLL/lymphoma 11A (zinc finger protein)	1.13727e-07	0	upregulated	upregulated
219507_at	3q25.32	RSRC1	arginine/serine-rich coiled-coil 1	0.00673343	upregulated	upregulated	upregulated
219518_s_at	15q15.3	ELL3	elongation factor RNA polymerase II-like 3	0.000252659	downregulated	downregulated	downregulated
219534_x_at	11p15.5	CDKN1C	cyclin-dependent kinase inhibitor 1C (p57, Kip2)	5.43076e-05	0	upregulated	upregulated
219555_s_at	16q23.2	CENPN	centromere protein N	2.16626e-05	upregulated	0	0
219563_at	14q32.13	C14orf139	chromosome 14 open reading frame 139	0.000781883	0	0	downregulated
219570_at	20p11.23	KIF16B	kinesin family member 16B	0.0170023	0	downregulated	0
219576_at	Xq26.3	MAP7D3	MAP7 domain containing 3	0.0466365	upregulated	0	0
219599_at	12q13.13	EIF4B	eukaryotic translation initiation factor 4B	0.00404418	0	0	downregulated
219681_s_at	8p11.22	RAB11FIP1	RAB11 family interacting protein 1 (class I)	0.000303112	0	downregulated	downregulated
219687_at	1q32	HHAT	hedgehog acyltransferase	0.00948938	0	upregulated	upregulated
219768_at	1p13.1	VTCN1	V-set domain containing T cell activation inhibitor 1	0.000199715	0	0	downregulated
219833_s_at	6p12.3	EFHC1	EF-hand domain (C-terminal) containing 1	0.000207321	0	downregulated	downregulated
219850_s_at	11p12	EHF	ets homologous factor	0.0102434	0	downregulated	downregulated
219880_at	NA	NA	NA	2.38758e-05	0	downregulated	downregulated
219885_at	17q12	SLFN12	schlafen family member 12	0.00547528	downregulated	downregulated	downregulated
219889_at	10q24.1	FRAT1	frequently rearranged in advanced T-cell lymphomas	3.55675e-06	0	upregulated	upregulated
219895_at	Xq24	FAM70A	family with sequence similarity 70, member A	3.03218e-06	0	downregulated	downregulated
219929_s_at	14q32.33	ZFYVE21	zinc finger, FYVE domain containing 21	0.0082232	0	upregulated	upregulated
219938_s_at	18q12	PSTPIP2	proline-serine-threonine phosphatase interacting protein 2	4.13612e-06	downregulated	downregulated	downregulated
219978_s_at	15q15.1	NUSAP1	nucleolar and spindle associated protein 1	0.0162195	upregulated	upregulated	upregulated
220030_at	12p13.2	STYK1	serine/threonine/tyrosine kinase 1	0.000869019	0	downregulated	downregulated
220056_at	1p36.11	IL22RA1	interleukin 22 receptor, alpha 1	0.00360594	0	0	upregulated
220072_at	8q13.2	CSPP1	centrosome and spindle pole associated protein 1	0.000740656	upregulated	upregulated	upregulated
220102_at	3q23	FOXL2	forkhead box L2	0.000659847	0	upregulated	upregulated
220104_at	7q34	ZC3HAV1	zinc finger CCCH-type, antiviral 1	2.02572e-06	downregulated	downregulated	downregulated
220161_s_at	9q31-q32	EPB41L4B	erythrocyte membrane protein band 4.1 like 4B	3.21185e-05	downregulated	downregulated	downregulated
220244_at	3p25.3	LOH3CR2A	loss of heterozygosity, 3, chromosomal region 2, gene A	0.0466416	0	downregulated	0
220274_at	2q37.2-q37.3	IQCA1	IQ motif containing with AAA domain 1	0.000686719	0	downregulated	downregulated
220311_at	21q21.3	N6AMT1	N-6 adenine-specific DNA methyltransferase 1 (putative)	0.00304718	0	upregulated	0
220322_at	2q12-q21	IL1F9	interleukin 1 family, member 9	4.83352e-05	0	0	downregulated
220326_s_at	14q11.2	FLJ10357	hypothetical protein FLJ10357	0.000319394	0	downregulated	0
220407_s_at	1q41	TGFB2	transforming growth factor, beta 2	1.3964e-06	0	downregulated	downregulated
220408_x_at	13q13.3	FAM48A	family with sequence similarity 48, member A	0.00518043	0	downregulated	0
220459_at	21q22.3	MCM3APAS	MCM3AP antisense RNA (non-protein coding)	0.00113599	0	downregulated	downregulated
220468_at	3q26.1	ARL14	ADP-ribosylation factor-like 14	3.10553e-05	0	upregulated	upregulated
220576_at	2q33.1	PGAP1	post-GPI attachment to proteins 1	0.0353144	0	0	upregulated
220617_s_at	18q21.32	ZNF532	zinc finger protein 532	8.9086e-06	downregulated	downregulated	downregulated
220638_s_at	19q13.2	CBLC	Cas-Br-M (murine) ecotropic retroviral transforming sequence c	0.0116411	0	0	downregulated
220688_s_at	1p36.13	MRTO4	mRNA turnover 4 homolog (S. cerevisiae)	0.000409446	0	upregulated	0
220840_s_at	1q24.2	C1orf112	chromosome 1 open reading frame 112	0.00260861	0	downregulated	downregulated
220892_s_at	9q21.2	PSAT1	phosphoserine aminotransferase 1	1.02141e-05	0	upregulated	upregulated
220911_s_at	14q12	KIAA1305	KIAA1305	3.19792e-05	0	downregulated	downregulated
220940_at	2q11.2	ANKRD36B	ankyrin repeat domain 36B	0.0124477	0	0	upregulated
220999_s_at	5q33.3	CYFIP2	cytoplasmic FMR1 interacting protein 2	4.09376e-06	downregulated	downregulated	downregulated
221009_s_at	19p13.3	ANGPTL4	angiopoietin-like 4	1.05072e-07	upregulated	upregulated	upregulated
221016_s_at	2p11.2	TCF7L1	transcription factor 7-like 1 (T-cell specific, HMG-box)	0.0411999	0	0	downregulated
221024_s_at	20q13.1	SLC2A10	solute carrier family 2 (facilitated glucose transporter), member 10	1.7194e-06	0	downregulated	downregulated
221029_s_at	12p13.3	WNT5B	wingless-type MMTV integration site family, member 5B	0.000496673	0	0	upregulated
221044_s_at	11p15	TRIM34	tripartite motif-containing 34	4.89192e-06	0	downregulated	downregulated
221234_s_at	6q15	BACH2	BTB and CNC homology 1, basic leucine zipper transcription factor 2	2.86627e-05	0	0	downregulated
221256_s_at	9q32	HDHD3	haloacid dehalogenase-like hydrolase domain containing 3	0.0189734	0	0	upregulated
221261_x_at	Xp11	MAGED4B	melanoma antigen family D, 4B	3.10281e-05	downregulated	downregulated	downregulated
221290_s_at	19p13.3	MUM1	melanoma associated antigen (mutated) 1	3.90751e-05	downregulated	downregulated	downregulated
221291_at	6q25	ULBP2	UL16 binding protein 2	0.0105814	0	upregulated	upregulated
221425_s_at	9q21.33	ISCA1	iron-sulfur cluster assembly 1 homolog (S. cerevisiae)	0.00032882	0	upregulated	upregulated
221489_s_at	5q31.3	SPRY4	sprouty homolog 4 (Drosophila)	0.00303306	0	0	downregulated
221539_at	8p12	EIF4EBP1	eukaryotic translation initiation factor 4E binding protein 1	0.0280977	0	upregulated	upregulated
221563_at	1q41	DUSP10	dual specificity phosphatase 10	5.8824e-06	0	downregulated	downregulated
221565_s_at	10pter-q26.12	CALHM2	calcium homeostasis modulator 2	0.00028834	0	0	upregulated
221589_s_at	14q24.3	ALDH6A1	aldehyde dehydrogenase 6 family, member A1	1.54417e-05	0	0	downregulated
221712_s_at	11q12.3	WDR74	WD repeat domain 74	0.000149771	0	upregulated	upregulated
221753_at	12q24.11	SSH1	slingshot homolog 1 (Drosophila)	0.0352196	upregulated	0	0
221756_at	22q12.2	PIK3IP1	phosphoinositide-3-kinase interacting protein 1	1.48279e-07	0	0	upregulated
221765_at	9q31	UGCG	UDP-glucose ceramide glucosyltransferase	0.00808446	0	0	downregulated
221766_s_at	6q14	FAM46A	family with sequence similarity 46, member A	1.30987e-05	0	0	upregulated
221771_s_at	13q12.11	MPHOSPH8	M-phase phosphoprotein 8	0.000711628	0	downregulated	0
221805_at	8p21	NEFL	neurofilament, light polypeptide	2.57381e-05	0	upregulated	upregulated
221810_at	14q23.3	RAB15	RAB15, member RAS onocogene family	2.93399e-05	0	downregulated	0
221815_at	15q26.1	ABHD2	abhydrolase domain containing 2	0.00645962	upregulated	upregulated	upregulated
221816_s_at	13q14.3	PHF11	PHD finger protein 11	8.1544e-05	0	downregulated	downregulated
221867_at	16q12.1	N4BP1	NEDD4 binding protein 1	0.000967503	0	downregulated	0
221873_at	11p15.4	ZNF143	zinc finger protein 143	0.044357	0	downregulated	0
221878_at	2p11.2	C2orf68	chromosome 2 open reading frame 68	9.02708e-07	0	downregulated	downregulated
221916_at	8p21	NEFL	neurofilament, light polypeptide	2.33505e-06	0	0	upregulated
221933_at	Xp22.32-p22.31	NLGN4X	neuroligin 4, X-linked	1.19771e-05	downregulated	downregulated	downregulated
222118_at	16q23.2	CENPN	centromere protein N	0.000133918	0	0	downregulated
222155_s_at	8q24.3	GPR172A	G protein-coupled receptor 172A	0.00369284	0	upregulated	upregulated
222184_at	NA	NA	NA	3.27402e-07	downregulated	0	downregulated
222186_at	15q25.1	ZFAND6	zinc finger, AN1-type domain 6	0.0439497	0	0	upregulated
222221_x_at	11q13	EHD1	EH-domain containing 1	0.00311382	0	0	downregulated
222294_s_at	15q15-q21.1	RAB27A	RAB27A, member RAS oncogene family	0.0367676	0	downregulated	0
222376_at	NA	NA	NA	0.000191811	0	downregulated	downregulated
222386_s_at	12q13.2-q13.3	COPZ1	coatomer protein complex, subunit zeta 1	0.00166691	0	upregulated	upregulated
222387_s_at	16q12	VPS35	vacuolar protein sorting 35 homolog (S. cerevisiae)	0.000541578	upregulated	upregulated	upregulated
222408_s_at	2p23.1	YPEL5	yippee-like 5 (Drosophila)	1.78282e-05	0	downregulated	0
222418_s_at	3p25.1	TMEM43	transmembrane protein 43	0.0183657	0	upregulated	upregulated
222420_s_at	7q32	UBE2H	ubiquitin-conjugating enzyme E2H (UBC8 homolog, yeast)	0.00309481	0	0	downregulated
222439_s_at	1p34.3	THRAP3	thyroid hormone receptor associated protein 3	0.0290778	upregulated	upregulated	0
222444_at	Xq21.33-q22.2	ARMCX3	armadillo repeat containing, X-linked 3	0.00433175	0	downregulated	downregulated
222494_at	14q31.3	FOXN3	forkhead box N3	0.000109791	0	downregulated	0
222508_s_at	13q33.3	ARGLU1	arginine and glutamate rich 1	0.0287691	0	upregulated	0
222519_s_at	3q13.12	IFT57	intraflagellar transport 57 homolog (Chlamydomonas)	0.00311382	0	0	upregulated
222522_x_at	6p21.1	MRPS10	mitochondrial ribosomal protein S10	6.03793e-06	upregulated	upregulated	upregulated
222527_s_at	5q33.1	RBM22	RNA binding motif protein 22	0.018092	0	upregulated	upregulated
222532_at	3q22.1	SRPRB	signal recognition particle receptor, B subunit	1.27196e-05	0	upregulated	upregulated
222546_s_at	11p15.5	EPS8L2	EPS8-like 2	0.0129271	upregulated	upregulated	0
222554_s_at	9p13.3	NOL6	nucleolar protein family 6 (RNA-associated)	0.00331454	0	upregulated	upregulated
222572_at	8q22.1	PPM2C	protein phosphatase 2C, magnesium-dependent, catalytic subunit	0.00029894	0	downregulated	downregulated
222582_at	7q36.1	PRKAG2	protein kinase, AMP-activated, gamma 2 non-catalytic subunit	0.00314781	0	0	downregulated
222611_s_at	13q12.11	PSPC1	paraspeckle component 1	0.00103728	0	upregulated	upregulated
222616_s_at	21q22.11	USP16	ubiquitin specific peptidase 16	4.17387e-05	upregulated	upregulated	upregulated
222622_at	16p13.3	PGP	phosphoglycolate phosphatase	0.000123292	0	upregulated	upregulated
222644_s_at	19p13.11	GLT25D1	glycosyltransferase 25 domain containing 1	0.00617594	0	0	upregulated
222662_at	8p23.1	PPP1R3B	protein phosphatase 1, regulatory (inhibitor) subunit 3B	5.0535e-05	0	downregulated	downregulated
222673_x_at	Xq26.3	FAM122B	family with sequence similarity 122B	0.0129167	0	downregulated	0
222688_at	11q13.5	ACER3	alkaline ceramidase 3	0.00932766	upregulated	0	0
222719_s_at	4q32	PDGFC	platelet derived growth factor C	0.00111231	0	downregulated	downregulated
222803_at	10p12.1	PRTFDC1	phosphoribosyl transferase domain containing 1	0.0147017	0	0	downregulated
222830_at	2p25.1	GRHL1	grainyhead-like 1 (Drosophila)	0.000475957	0	downregulated	0
222834_s_at	1p31.3	GNG12	guanine nucleotide binding protein (G protein), gamma 12	0.000763471	upregulated	upregulated	upregulated
222835_at	15q23	THSD4	thrombospondin, type I, domain containing 4	0.00143023	upregulated	upregulated	0
222847_s_at	14q13.1	EGLN3	egl nine homolog 3 (C. elegans)	0.000309574	0	downregulated	downregulated
222881_at	4q21.3	HPSE	heparanase	0.000345211	0	downregulated	downregulated
222883_at	1p32.3	C1orf163	chromosome 1 open reading frame 163	0.000277014	0	upregulated	0
222891_s_at	2p16.1	BCL11A	B-cell CLL/lymphoma 11A (zinc finger protein)	1.25675e-07	0	upregulated	upregulated
222895_s_at	14q32.2	BCL11B	B-cell CLL/lymphoma 11B (zinc finger protein)	0.00057879	0	upregulated	upregulated
223010_s_at	4p11	OCIAD1	OCIA domain containing 1	0.000242339	upregulated	upregulated	upregulated
223038_s_at	12p11	FAM60A	family with sequence similarity 60, member A	0.00618612	upregulated	upregulated	0
223043_at	15q14	TMEM85	transmembrane protein 85	0.00224671	0	upregulated	upregulated
223062_s_at	9q21.2	PSAT1	phosphoserine aminotransferase 1	4.38956e-05	0	upregulated	upregulated
223081_at	17p13.1	PHF23	PHD finger protein 23	0.000134392	0	upregulated	upregulated
223111_x_at	1q42.1-q43	ARID4B	AT rich interactive domain 4B (RBP1-like)	0.0300266	0	0	upregulated
223126_s_at	1q25	C1orf21	chromosome 1 open reading frame 21	0.000250203	0	downregulated	downregulated
223162_s_at	7q34	KIAA1147	KIAA1147	0.00016495	0	downregulated	downregulated
223168_at	1q42.11-q42.3	RHOU	ras homolog gene family, member U	4.29104e-05	0	upregulated	upregulated
223194_s_at	6p25.2	SLC22A23	solute carrier family 22, member 23	5.80933e-05	0	downregulated	0
223216_x_at	8p21.1	ZNF395	zinc finger protein 395	0.00325418	0	downregulated	downregulated
223220_s_at	3q13-q21	PARP9	poly (ADP-ribose) polymerase family, member 9	3.16445e-08	0	downregulated	downregulated
223222_at	17q25.3	SLC25A19	solute carrier family 25 (mitochondrial thiamine pyrophosphate carrier), member 19	0.000391706	0	upregulated	upregulated
223233_s_at	1q21	CGN	cingulin	9.92534e-05	0	downregulated	downregulated
223282_at	18q22.3	TSHZ1	teashirt zinc finger homeobox 1	1.06984e-05	0	upregulated	upregulated
223283_s_at	18q22.3	TSHZ1	teashirt zinc finger homeobox 1	0.000390858	0	0	upregulated
223285_s_at	9q34	ST6GALNAC4	ST6 (alpha-N-acetyl-neuraminyl-2,3-beta-galactosyl-1,3)-N-acetylgalactosaminide alpha-2,6-sialyltransferase 4	0.00199785	0	0	upregulated
223311_s_at	2p21	MTA3	metastasis associated 1 family, member 3	3.88374e-05	0	downregulated	downregulated
223333_s_at	19p13.3	ANGPTL4	angiopoietin-like 4	7.4375e-08	upregulated	upregulated	upregulated
223373_s_at	4q25	PLA2G12A	phospholipase A2, group XIIA	0.000496281	upregulated	upregulated	upregulated
223378_at	16p13.3	GLIS2	GLIS family zinc finger 2	9.1341e-06	downregulated	downregulated	downregulated
223384_s_at	7q22-q31.1	TRIM4	tripartite motif-containing 4	0.000304868	0	0	downregulated
223394_at	19q13.1-q13.2	SERTAD1	SERTA domain containing 1	0.0057283	0	downregulated	downregulated
223397_s_at	16q22.1	NIP7	nuclear import 7 homolog (S. cerevisiae)	0.000105265	0	0	downregulated
223413_s_at	4p16.2	LYAR	Ly1 antibody reactive homolog (mouse)	0.00398895	upregulated	upregulated	0
223414_s_at	4p16.2	LYAR	Ly1 antibody reactive homolog (mouse)	4.04753e-05	0	upregulated	0
223438_s_at	22q12-q13.1	PPARA	peroxisome proliferator-activated receptor alpha	0.000398765	0	downregulated	downregulated
223467_at	17p11.2	RASD1	RAS, dexamethasone-induced 1	1.16797e-05	upregulated	upregulated	upregulated
223473_at	19p13.11	FKSG24	hypothetical protein MGC12972	0.00330002	0	upregulated	upregulated
223484_at	15q21.1	C15orf48	chromosome 15 open reading frame 48	4.90339e-08	0	0	downregulated
223489_x_at	9p11	EXOSC3	exosome component 3	0.00116727	upregulated	upregulated	upregulated
223495_at	19q13.32	CCDC8	coiled-coil domain containing 8	0.000454083	0	upregulated	upregulated
223541_at	16q22.1	HAS3	hyaluronan synthase 3	1.18139e-05	0	0	downregulated
223546_x_at	16p13.3	LUC7L	LUC7-like (S. cerevisiae)	0.00028834	0	upregulated	upregulated
223566_s_at	Xp21.2-p11.4	BCOR	BCL6 co-repressor	0.000228781	0	0	upregulated
223584_s_at	7p14.3	KBTBD2	kelch repeat and BTB (POZ) domain containing 2	0.00294297	0	downregulated	downregulated
223585_x_at	7p14.3	KBTBD2	kelch repeat and BTB (POZ) domain containing 2	0.00095473	downregulated	downregulated	downregulated
223599_at	11p15.4	TRIM6	tripartite motif-containing 6	0.000141861	0	downregulated	downregulated
223611_s_at	4q12	LNX1	ligand of numb-protein X 1	0.000243142	0	downregulated	0
223642_at	13q32	ZIC2	Zic family member 2 (odd-paired homolog, Drosophila)	0.024195	0	upregulated	upregulated
223649_s_at	17q12	SLC25A39	solute carrier family 25, member 39	0.000942315	0	upregulated	upregulated
223652_at	10q24.32	AS3MT	arsenic (+3 oxidation state) methyltransferase	1.57897e-05	0	downregulated	downregulated
223666_at	20p11	SNX5	sorting nexin 5	0.000349161	upregulated	0	upregulated
223743_s_at	19p13.2	MRPL4	mitochondrial ribosomal protein L4	0.0160807	0	upregulated	upregulated
223758_s_at	5q12.2-q13.3	GTF2H2	general transcription factor IIH, polypeptide 2, 44kDa	9.85876e-05	upregulated	upregulated	upregulated
223774_at	1p35.3	SNHG12	small nucleolar RNA host gene 12 (non-protein coding)	0.000189573	downregulated	upregulated	0
223834_at	9p24	CD274	CD274 molecule	0.00172922	0	downregulated	0
223909_s_at	Xq13	HDAC8	histone deacetylase 8	0.0018869	0	0	upregulated
223980_s_at	2q37.1	SP110	SP110 nuclear body protein	0.000175442	0	downregulated	downregulated
224009_x_at	2q31.1	DHRS9	dehydrogenase/reductase (SDR family) member 9	0.000122534	0	upregulated	upregulated
224013_s_at	8p22	SOX7	SRY (sex determining region Y)-box 7	0.00403304	0	0	downregulated
224060_s_at	1p21.2	DPH5	DPH5 homolog (S. cerevisiae)	0.000257464	upregulated	upregulated	upregulated
224173_s_at	2q11.2	MRPL30	mitochondrial ribosomal protein L30	0.0192824	downregulated	0	downregulated
224177_s_at	Xq13.3	CXorf26	chromosome X open reading frame 26	0.00229906	0	upregulated	upregulated
224187_x_at	11q24.1	HSPA8	heat shock 70kDa protein 8	2.71983e-05	0	upregulated	0
224233_s_at	1q22	MSTO1	misato homolog 1 (Drosophila)	0.000124045	0	upregulated	upregulated
224247_s_at	6p21.1	MRPS10	mitochondrial ribosomal protein S10	1.46409e-05	upregulated	upregulated	upregulated
224311_s_at	2q37.1	CAB39	calcium binding protein 39	0.00113581	0	downregulated	downregulated
224365_s_at	16p13.3	TIGD7	tigger transposable element derived 7	0.0012283	0	downregulated	0
224414_s_at	5p13.1	CARD6	caspase recruitment domain family, member 6	2.09749e-06	0	0	upregulated
224467_s_at	19q13.11	PDCD2L	programmed cell death 2-like	1.11396e-05	0	upregulated	0
224468_s_at	19q13.33	C19orf48	chromosome 19 open reading frame 48	0.000345169	upregulated	upregulated	upregulated
224480_s_at	4q21.23	AGPAT9	1-acylglycerol-3-phosphate O-acyltransferase 9	2.05229e-08	upregulated	upregulated	upregulated
224524_s_at	2p16-p14	ASB3	ankyrin repeat and SOCS box-containing 3	0.002036	0	downregulated	0
224567_x_at	11q13.1	MALAT1	metastasis associated lung adenocarcinoma transcript 1 (non-protein coding)	0.023234	upregulated	upregulated	upregulated
224571_at	1q42.3	IRF2BP2	interferon regulatory factor 2 binding protein 2	4.36116e-05	0	0	downregulated
224615_x_at	20q11.21	HM13	histocompatibility (minor) 13	0.0138637	0	upregulated	upregulated
224632_at	1q22	GPATCH4	G patch domain containing 4	0.0269832	0	upregulated	upregulated
224649_x_at	10p11.21	CCNY	cyclin Y	0.00959349	0	0	downregulated
224657_at	1p36	ERRFI1	ERBB receptor feedback inhibitor 1	0.00178747	0	downregulated	downregulated
224661_at	4q22.1	PIGY	phosphatidylinositol glycan anchor biosynthesis, class Y	0.0131229	upregulated	upregulated	upregulated
224693_at	20q13.2	C20orf108	chromosome 20 open reading frame 108	3.48444e-05	0	downregulated	downregulated
224704_at	16p11.2	TNRC6A	trinucleotide repeat containing 6A	0.00365716	downregulated	0	0
224714_at	2q14.3	MKI67IP	MKI67 (FHA domain) interacting nucleolar phosphoprotein	0.000204427	upregulated	upregulated	0
224758_at	7q33	PL-5283	PL-5283 protein	0.000531427	0	downregulated	downregulated
224772_at	1q32.3	NAV1	neuron navigator 1	0.00541268	0	downregulated	0
224784_at	17q21	MLLT6	myeloid/lymphoid or mixed-lineage leukemia (trithorax homolog, Drosophila); translocated to, 6	0.00806627	0	0	downregulated
224797_at	5q14.3	ARRDC3	arrestin domain containing 3	0.0003361	0	upregulated	upregulated
224822_at	8p22	DLC1	deleted in liver cancer 1	8.41708e-05	0	downregulated	downregulated
224833_at	11q23.3	ETS1	v-ets erythroblastosis virus E26 oncogene homolog 1 (avian)	1.03624e-05	0	downregulated	downregulated
224839_s_at	16q12.1	GPT2	glutamic pyruvate transaminase (alanine aminotransferase) 2	3.57587e-05	0	upregulated	upregulated
224853_at	4p12	SLAIN2	SLAIN motif family, member 2	0.00188081	upregulated	upregulated	0
224870_at	4q12	KIAA0114	KIAA0114	0.000544086	0	upregulated	upregulated
224877_s_at	2p11.2-q11.2	MRPS5	mitochondrial ribosomal protein S5	0.000528518	upregulated	upregulated	upregulated
224967_at	9q31	UGCG	UDP-glucose ceramide glucosyltransferase	0.00398728	0	downregulated	downregulated
224978_s_at	17q25.3	USP36	ubiquitin specific peptidase 36	1.10893e-05	downregulated	upregulated	downregulated
224979_s_at	17q25.3	USP36	ubiquitin specific peptidase 36	0.00396036	upregulated	upregulated	0
225005_at	1p36.31	PHF13	PHD finger protein 13	3.51377e-06	0	0	upregulated
225021_at	18q21.32	ZNF532	zinc finger protein 532	8.49757e-07	downregulated	downregulated	downregulated
225102_at	3q21.3	MGLL	monoglyceride lipase	5.67461e-05	0	0	downregulated
225103_at	17q25.3	MRPL38	mitochondrial ribosomal protein L38	0.00750806	0	upregulated	upregulated
225135_at	15q24.2	SIN3A	SIN3 homolog A, transcription regulator (yeast)	4.21408e-05	0	0	upregulated
225172_at	16p13.3	CRAMP1L	Crm, cramped-like (Drosophila)	0.000697573	0	0	upregulated
225173_at	6q22.33	ARHGAP18	Rho GTPase activating protein 18	0.000201151	upregulated	upregulated	upregulated
225202_at	5q15	RHOBTB3	Rho-related BTB domain containing 3	7.78193e-05	0	0	downregulated
225207_at	7q21.3	PDK4	pyruvate dehydrogenase kinase, isozyme 4	4.68041e-09	upregulated	upregulated	upregulated
225224_at	20q11.1-q11.23	C20orf112	chromosome 20 open reading frame 112	3.13233e-05	0	downregulated	0
225241_at	3q13.2	CCDC80	coiled-coil domain containing 80	0.00435088	upregulated	upregulated	upregulated
225283_at	15q26.3	ARRDC4	arrestin domain containing 4	3.62823e-05	downregulated	0	downregulated
225313_at	20q13.2-q13.33	C20orf177	chromosome 20 open reading frame 177	0.014985	0	upregulated	upregulated
225327_at	15q21.2	KIAA1370	KIAA1370	0.000355619	0	downregulated	0
225355_at	5q35.1	NEURL1B	neuralized homolog 1B (Drosophila)	4.36319e-05	0	downregulated	downregulated
225393_at	1q21.3	GATAD2B	GATA zinc finger domain containing 2B	0.000603962	downregulated	downregulated	0
225400_at	1q25	TSEN15	tRNA splicing endonuclease 15 homolog (S. cerevisiae)	0.000753784	0	upregulated	0
225415_at	3q21.1	DTX3L	deltex 3-like (Drosophila)	4.20541e-06	0	0	downregulated
225417_at	10p11	EPC1	enhancer of polycomb homolog 1 (Drosophila)	0.00267339	0	0	downregulated
225420_at	10q25.2	GPAM	glycerol-3-phosphate acyltransferase, mitochondrial	0.00170131	upregulated	upregulated	upregulated
225446_at	21q22.2	BRWD1	bromodomain and WD repeat domain containing 1	1.16974e-05	0	downregulated	downregulated
225455_at	1q24.1	TADA1L	transcriptional adaptor 1 (HFI1 homolog, yeast)-like	3.81784e-05	0	upregulated	upregulated
225474_at	3p14.1	MAGI1	membrane associated guanylate kinase, WW and PDZ domain containing 1	0.00243761	0	0	downregulated
225477_s_at	3p25	NR2C2	nuclear receptor subfamily 2, group C, member 2	0.000522524	0	downregulated	0
225584_at	6p21.3	TRIM26	tripartite motif-containing 26	0.00468814	upregulated	upregulated	upregulated
225611_at	5q12.3	MAST4	microtubule associated serine/threonine kinase family member 4	1.48706e-05	0	downregulated	downregulated
225613_at	5q12.3	MAST4	microtubule associated serine/threonine kinase family member 4	0.000236613	0	downregulated	downregulated
225615_at	1p36.13	IFFO2	intermediate filament family orphan 2	1.72506e-05	0	downregulated	downregulated
225625_at	12q24.11	ALKBH2	alkB, alkylation repair homolog 2 (E. coli)	0.000170753	upregulated	upregulated	upregulated
225627_s_at	1p31.3	CACHD1	cache domain containing 1	0.00365716	0	0	upregulated
225636_at	12q13.2	STAT2	signal transducer and activator of transcription 2, 113kDa	4.78496e-07	downregulated	downregulated	downregulated
225639_at	7p21-p15	SKAP2	src kinase associated phosphoprotein 2	0.00671248	0	downregulated	downregulated
225645_at	11p12	EHF	ets homologous factor	0.028153	0	downregulated	0
225646_at	11q14.1-q14.3	CTSC	cathepsin C	2.30525e-05	0	0	upregulated
225647_s_at	11q14.1-q14.3	CTSC	cathepsin C	1.82293e-06	0	upregulated	upregulated
225656_at	6p12.3	EFHC1	EF-hand domain (C-terminal) containing 1	0.0151009	0	0	upregulated
225667_s_at	2p24.3	FAM84A	family with sequence similarity 84, member A	0.000108009	0	downregulated	downregulated
225673_at	19q13.41	MYADM	myeloid-associated differentiation marker	0.00205932	0	downregulated	downregulated
225699_at	7p13	C7orf40	chromosome 7 open reading frame 40	3.7903e-05	upregulated	upregulated	0
225706_at	7p21.3	GLCCI1	glucocorticoid induced transcript 1	0.0170491	0	0	upregulated
225728_at	4q35.1	SORBS2	sorbin and SH3 domain containing 2	0.0113762	0	0	downregulated
225751_at	10p15.1	RBM17	RNA binding motif protein 17	8.30466e-05	upregulated	upregulated	upregulated
225762_x_at	20p11.1	LOC284801	hypothetical protein LOC284801	1.70558e-06	upregulated	upregulated	upregulated
225767_at	20p11.1	LOC284801	hypothetical protein LOC284801	0.000389582	0	upregulated	0
225774_at	16q13	RSPRY1	ring finger and SPRY domain containing 1	0.0211868	0	0	downregulated
225798_at	7p15.2-p15.1	JAZF1	JAZF zinc finger 1	0.000220281	0	downregulated	downregulated
225799_at	2q13	LOC541471	hypothetical LOC541471	4.96068e-05	0	0	downregulated
225803_at	8q24.13	FBXO32	F-box protein 32	4.78496e-07	0	upregulated	upregulated
225816_at	4q26-q27	PHF17	PHD finger protein 17	0.00324155	0	upregulated	upregulated
225818_s_at	11q24.2	TBRG1	transforming growth factor beta regulator 1	1.35804e-05	upregulated	upregulated	upregulated
225820_at	4q26-q27	PHF17	PHD finger protein 17	0.000118296	0	upregulated	upregulated
225825_at	20p13	C20orf194	chromosome 20 open reading frame 194	0.00348216	0	downregulated	downregulated
225842_at	12q15	PHLDA1	pleckstrin homology-like domain, family A, member 1	4.31391e-06	0	downregulated	downregulated
225866_at	6q21	BXDC1	brix domain containing 1	0.00123099	0	upregulated	0
225886_at	17q21	DDX5	DEAD (Asp-Glu-Ala-Asp) box polypeptide 5	0.000174091	downregulated	downregulated	downregulated
225897_at	6q22.2	MARCKS	myristoylated alanine-rich protein kinase C substrate	2.73026e-05	0	downregulated	downregulated
225912_at	8q22	TP53INP1	tumor protein p53 inducible nuclear protein 1	1.35544e-07	0	0	upregulated
225929_s_at	17q25.3	RNF213	ring finger protein 213	0.000640754	0	downregulated	downregulated
225931_s_at	17q25.3	RNF213	ring finger protein 213	0.000545271	0	downregulated	downregulated
225949_at	8q24.3	NRBP2	nuclear receptor binding protein 2	0.00172922	downregulated	downregulated	downregulated
225957_at	5q35.2	C5orf41	chromosome 5 open reading frame 41	0.0018653	0	0	upregulated
225962_at	16q23.1	ZNRF1	zinc and ring finger 1	0.000182794	0	downregulated	downregulated
225975_at	4q31	PCDH18	protocadherin 18	1.95673e-05	0	upregulated	upregulated
225987_at	7q21.12	STEAP4	STEAP family member 4	3.21185e-05	0	downregulated	downregulated
225998_at	4q31.21	GAB1	GRB2-associated binding protein 1	7.95924e-05	downregulated	downregulated	0
226004_at	20q13.33	CABLES2	Cdk5 and Abl enzyme substrate 2	0.000696178	0	downregulated	0
226013_at	3p25.3-p24.1	TRAK1	trafficking protein, kinesin binding 1	2.16626e-05	downregulated	downregulated	0
226016_at	3q13.1-q13.2	CD47	CD47 molecule	0.0134588	0	0	downregulated
226022_at	6q24.3	SASH1	SAM and SH3 domain containing 1	4.39271e-05	0	downregulated	downregulated
226028_at	11q24.2	ROBO4	roundabout homolog 4, magic roundabout (Drosophila)	0.0117945	0	0	downregulated
226034_at	NA	NA	NA	1.58432e-08	upregulated	downregulated	downregulated
226047_at	11p15	MRVI1	murine retrovirus integration site 1 homolog	0.00140631	0	0	downregulated
226070_at	9q34.3	C9orf142	chromosome 9 open reading frame 142	0.0386089	0	upregulated	0
226113_at	1p36	ZNF436	zinc finger protein 436	1.18139e-05	0	upregulated	upregulated
226114_at	1p36	ZNF436	zinc finger protein 436	2.54313e-05	0	upregulated	upregulated
226137_at	16q22.3-q23.1	ZFHX3	zinc finger homeobox 3	0.0361112	0	downregulated	0
226140_s_at	10p12.2	OTUD1	OTU domain containing 1	2.08507e-06	0	0	downregulated
226145_s_at	4q21.21	FRAS1	Fraser syndrome 1	0.000957911	0	downregulated	0
226193_x_at	9q12	CBWD5	COBW domain containing 5	7.17561e-06	upregulated	upregulated	upregulated
226213_at	12q13	ERBB3	v-erb-b2 erythroblastic leukemia viral oncogene homolog 3 (avian)	7.97034e-06	0	0	upregulated
226221_at	9p24.1	KIAA1432	KIAA1432	0.000356995	0	downregulated	0
226222_at	9p24.1	KIAA1432	KIAA1432	0.000978944	0	downregulated	downregulated
226249_at	9q32	SNX30	sorting nexin family member 30	0.000366111	0	downregulated	downregulated
226258_at	12p11.21	AMN1	antagonist of mitotic exit network 1 homolog (S. cerevisiae)	0.00278713	0	downregulated	downregulated
226264_at	9q31.3-q33.1	SUSD1	sushi domain containing 1	0.000101182	0	downregulated	downregulated
226272_at	1p35.3-p33	RCAN3	RCAN family member 3	9.32649e-06	0	downregulated	downregulated
226279_at	11q14.1	PRSS23	protease, serine, 23	0.00174068	0	downregulated	downregulated
226349_at	12q23.3	C12orf45	chromosome 12 open reading frame 45	0.00033469	0	upregulated	0
226364_at	7q11.23	HIP1	huntingtin interacting protein 1	5.4257e-05	0	downregulated	downregulated
226368_at	12q	CHST11	carbohydrate (chondroitin 4) sulfotransferase 11	0.000215999	upregulated	upregulated	upregulated
226444_at	NA	NA	NA	1.10893e-05	0	downregulated	downregulated
226452_at	2q31.1	PDK1	pyruvate dehydrogenase kinase, isozyme 1	0.0467345	0	0	downregulated
226466_s_at	Xq28	FAM58A	family with sequence similarity 58, member A	0.000732635	0	upregulated	0
226473_at	17q25.3	CBX2	chromobox homolog 2 (Pc class homolog, Drosophila)	0.000110178	0	upregulated	upregulated
226474_at	16q13	NLRC5	NLR family, CARD domain containing 5	5.63125e-05	downregulated	downregulated	downregulated
226487_at	12q24.11	C12orf34	chromosome 12 open reading frame 34	0.000265295	0	upregulated	upregulated
226499_at	9q34.3	NRARP	NOTCH-regulated ankyrin repeat protein	4.11173e-05	0	upregulated	upregulated
226530_at	15q14	BMF	Bcl2 modifying factor	1.2258e-06	0	0	upregulated
226590_at	9q32	ZNF618	zinc finger protein 618	4.88049e-05	downregulated	downregulated	downregulated
226607_at	20p13	C20orf194	chromosome 20 open reading frame 194	8.17425e-06	0	downregulated	downregulated
226649_at	10q23.31	PANK1	pantothenate kinase 1	4.59663e-07	downregulated	upregulated	upregulated
226657_at	17p11.2	MGC33894	transcript expressed during hematopoiesis 2	1.12608e-06	0	0	upregulated
226683_at	5q11.2	SNX18	sorting nexin 18	0.000591087	0	downregulated	downregulated
226694_at	9q31-q33	AKAP2	A kinase (PRKA) anchor protein 2	1.27541e-06	0	0	downregulated
226725_at	NA	NA	NA	0.00382005	0	0	downregulated
226756_at	NA	NA	NA	0.0297303	0	downregulated	0
226764_at	4q31.22	ZNF827	zinc finger protein 827	0.00336982	0	downregulated	0
226825_s_at	4q12	TMEM165	transmembrane protein 165	0.00138823	0	0	upregulated
226838_at	2p24.1	TTC32	tetratricopeptide repeat domain 32	2.36224e-05	0	downregulated	downregulated
226847_at	5q11.2	FST	follistatin	3.60746e-05	0	0	downregulated
226863_at	2p25.3	FAM110C	family with sequence similarity 110, member C	7.17659e-05	0	downregulated	downregulated
226893_at	1q24-q25	ABL2	v-abl Abelson murine leukemia viral oncogene homolog 2 (arg, Abelson-related gene)	0.000468057	0	downregulated	downregulated
226907_at	6q24.3-q25.3	PPP1R14C	protein phosphatase 1, regulatory (inhibitor) subunit 14C	9.12111e-07	downregulated	downregulated	downregulated
226908_at	12q14.1	LRIG3	leucine-rich repeats and immunoglobulin-like domains 3	7.4375e-08	0	upregulated	upregulated
226926_at	19q13.12	DMKN	dermokine	0.00109438	upregulated	upregulated	upregulated
226933_s_at	6p22-p21	ID4	inhibitor of DNA binding 4, dominant negative helix-loop-helix protein	5.71523e-05	0	downregulated	downregulated
226947_at	6p11.2	GUSBL2	glucuronidase, beta-like 2	0.000515729	0	upregulated	upregulated
226955_at	5q33.1	AFAP1L1	actin filament associated protein 1-like 1	0.00355364	0	0	downregulated
226964_at	NA	NA	NA	0.037134	0	downregulated	0
226978_at	22q12-q13.1	PPARA	peroxisome proliferator-activated receptor alpha	4.68795e-06	0	downregulated	downregulated
226991_at	20q13.2-q13.3	NFATC2	nuclear factor of activated T-cells, cytoplasmic, calcineurin-dependent 2	0.00218379	0	downregulated	0
227013_at	13q11-q12	LATS2	LATS, large tumor suppressor, homolog 2 (Drosophila)	5.0535e-05	downregulated	downregulated	downregulated
227019_at	1q23.3	C1orf226	chromosome 1 open reading frame 226	5.41326e-05	downregulated	downregulated	downregulated
227020_at	17q22	YPEL2	yippee-like 2 (Drosophila)	2.02572e-06	0	0	upregulated
227037_at	17p11.2	PLD6	phospholipase D family, member 6	6.92688e-05	0	upregulated	0
227039_at	15q24-q25	AKAP13	A kinase (PRKA) anchor protein 13	0.0350996	0	downregulated	downregulated
227093_at	17q25.3	USP36	ubiquitin specific peptidase 36	0.0021935	0	upregulated	0
227099_s_at	11p11.2	LOC387763	hypothetical protein LOC387763	1.27541e-06	upregulated	upregulated	upregulated
227103_s_at	.	ECE2	endothelin converting enzyme 2	0.00270108	0	upregulated	upregulated
227112_at	3q21.3	TMCC1	transmembrane and coiled-coil domain family 1	0.000121138	0	downregulated	downregulated
227144_at	22q13.31	C22orf9	chromosome 22 open reading frame 9	7.97131e-05	downregulated	downregulated	downregulated
227173_s_at	6q15	BACH2	BTB and CNC homology 1, basic leucine zipper transcription factor 2	0.000769654	0	0	downregulated
227236_at	1p13.2	TSPAN2	tetraspanin 2	0.0119461	0	0	downregulated
227252_at	NA	NA	NA	8.37829e-05	0	downregulated	downregulated
227257_s_at	10q26.11	C10orf46	chromosome 10 open reading frame 46	0.0129891	upregulated	upregulated	0
227306_at	NA	NA	NA	4.3903e-06	0	upregulated	upregulated
227367_at	NA	NA	NA	0.000188851	0	0	downregulated
227368_at	NA	NA	NA	0.00501408	0	downregulated	downregulated
227376_at	7p13	GLI3	GLI family zinc finger 3	0.003545	0	downregulated	0
227402_s_at	8q24.11	UTP23	UTP23, small subunit (SSU) processome component, homolog (yeast)	0.000724109	upregulated	upregulated	0
227404_s_at	5q31.1	EGR1	early growth response 1	0.00982223	0	upregulated	upregulated
227420_at	19p13.3	TNFAIP8L1	tumor necrosis factor, alpha-induced protein 8-like 1	2.93177e-05	0	downregulated	downregulated
227425_at	Xp22.2	REPS2	RALBP1 associated Eps domain containing 2	0.00213742	0	downregulated	downregulated
227443_at	9p23	C9orf150	chromosome 9 open reading frame 150	0.000367138	0	upregulated	0
227449_at	2q36.1	EPHA4	EPH receptor A4	4.25004e-08	downregulated	upregulated	upregulated
227458_at	NA	NA	NA	8.82315e-06	upregulated	downregulated	downregulated
227475_at	6p25	FOXQ1	forkhead box Q1	0.000522077	0	upregulated	0
227488_at	Xq26.3	MGC16121	hypothetical protein MGC16121	0.00057879	upregulated	upregulated	upregulated
227501_at	NA	NA	NA	0.00737943	0	0	upregulated
227563_at	9q12	FAM27E3	family with sequence similarity 27, member E3	0.000392784	upregulated	upregulated	upregulated
227572_at	12q24.11	USP30	ubiquitin specific peptidase 30	1.82587e-06	downregulated	downregulated	0
227609_at	13q13.3	EPSTI1	epithelial stromal interaction 1 (breast)	4.59663e-07	0	downregulated	downregulated
227618_at	NA	NA	NA	0.00153921	0	downregulated	downregulated
227699_at	14q23.1	C14orf149	chromosome 14 open reading frame 149	1.36781e-06	0	upregulated	0
227703_s_at	Xq21.33	SYTL4	synaptotagmin-like 4	0.000856167	0	downregulated	downregulated
227717_at	5q33.1	FLJ41603	FLJ41603 protein	8.66963e-06	downregulated	downregulated	downregulated
227807_at	3q13-q21	PARP9	poly (ADP-ribose) polymerase family, member 9	0.000185016	0	downregulated	downregulated
227811_at	NA	FGD3	FYVE, RhoGEF and PH domain containing 3	0.00411596	0	downregulated	0
227875_at	Xq23-q24	KLHL13	kelch-like 13 (Drosophila)	0.000125644	0	downregulated	downregulated
227897_at	3q25.2	RAP2B	RAP2B, member of RAS oncogene family	0.00285415	0	0	downregulated
227909_at	Xq26.3	NCRNA00087	non-protein coding RNA 87	0.000417054	0	downregulated	0
227919_at	19p13.12	UCA1	urothelial cancer associated 1	7.78193e-05	0	0	downregulated
227930_at	1p34.3	EIF2C4	eukaryotic translation initiation factor 2C, 4	1.03765e-06	0	downregulated	downregulated
227945_at	4p14	TBC1D1	TBC1 (tre-2/USP6, BUB2, cdc16) domain family, member 1	0.000149771	0	downregulated	downregulated
227985_at	NA	NA	NA	8.4364e-05	0	0	downregulated
228008_at	NA	NA	NA	0.000220478	0	downregulated	0
228038_at	3q26.3-q27	SOX2	SRY (sex determining region Y)-box 2	1.48279e-07	0	upregulated	upregulated
228046_at	4q31.22	ZNF827	zinc finger protein 827	3.68876e-06	0	downregulated	0
228054_at	3q29	TMEM44	transmembrane protein 44	3.21185e-05	0	downregulated	downregulated
228080_at	11q23.1	LAYN	layilin	7.80403e-05	0	downregulated	downregulated
228081_at	4q21.1	CCNG2	cyclin G2	5.56459e-06	0	0	upregulated
228114_x_at	16p13.3	C16orf13	chromosome 16 open reading frame 13	0.0191111	0	upregulated	upregulated
228115_at	NA	NA	NA	0.00066985	0	0	upregulated
228121_at	1q41	TGFB2	transforming growth factor, beta 2	3.13355e-05	0	downregulated	downregulated
228176_at	9q22.1	C9orf47	chromosome 9 open reading frame 47	9.88439e-05	0	0	downregulated
228181_at	1q32-q41	SLC30A1	solute carrier family 30 (zinc transporter), member 1	1.58275e-08	0	downregulated	downregulated
228188_at	2p23.3	FOSL2	FOS-like antigen 2	1.27019e-07	0	downregulated	downregulated
228204_at	1q21	PSMB4	proteasome (prosome, macropain) subunit, beta type, 4	0.00242774	0	0	downregulated
228230_at	20q13.33	PRIC285	peroxisomal proliferator-activated receptor A interacting complex 285	0.00234242	0	downregulated	downregulated
228235_at	Xq26.3	MGC16121	hypothetical protein MGC16121	0.00095119	upregulated	0	0
228259_s_at	5q22.2	EPB41L4A	erythrocyte membrane protein band 4.1 like 4A	0.00992091	0	0	downregulated
228262_at	Xp22.12	MAP7D2	MAP7 domain containing 2	7.71097e-07	downregulated	downregulated	downregulated
228266_s_at	15q25.2	HDGFRP3	hepatoma-derived growth factor, related protein 3	0.00122569	upregulated	upregulated	upregulated
228315_at	NA	NA	NA	9.47389e-05	upregulated	upregulated	upregulated
228335_at	3q26.2-q26.3	CLDN11	claudin 11	5.1796e-06	0	0	downregulated
228400_at	4q21.1	SHROOM3	shroom family member 3	3.03218e-06	0	downregulated	downregulated
228440_at	NA	NA	NA	0.000452835	0	downregulated	downregulated
228442_at	NA	NA	NA	0.00014415	downregulated	downregulated	downregulated
228523_at	10q26.11	NANOS1	nanos homolog 1 (Drosophila)	0.000743658	0	0	downregulated
228607_at	12q24.2	OAS2	2'-5'-oligoadenylate synthetase 2, 69/71kDa	6.4738e-05	0	downregulated	downregulated
228661_s_at	NA	NA	NA	0.002582	0	upregulated	0
228667_at	6q26	AGPAT4	1-acylglycerol-3-phosphate O-acyltransferase 4 (lysophosphatidic acid acyltransferase, delta)	0.000462722	0	downregulated	downregulated
228674_s_at	2p22-p21	EML4	echinoderm microtubule associated protein like 4	9.97013e-06	upregulated	upregulated	upregulated
228698_at	8p22	SOX7	SRY (sex determining region Y)-box 7	0.00137554	0	downregulated	downregulated
228722_at	21q22.3	PRMT2	protein arginine methyltransferase 2	7.47239e-06	downregulated	downregulated	downregulated
228771_at	22q11	ADRBK2	adrenergic, beta, receptor kinase 2	0.0276833	0	downregulated	0
228824_s_at	9q31.3	PTGR1	prostaglandin reductase 1	0.000264975	upregulated	upregulated	upregulated
228851_s_at	1q21.2	ENSA	endosulfine alpha	0.00112676	upregulated	upregulated	upregulated
228900_at	17p11.2	CYTSB	cytospin B	0.000409993	0	downregulated	0
228948_at	2q36.1	EPHA4	EPH receptor A4	5.69715e-06	0	upregulated	0
228964_at	6q21-q22.1	PRDM1	PR domain containing 1, with ZNF domain	2.87754e-07	0	upregulated	upregulated
228990_at	1p35.3	SNHG12	small nucleolar RNA host gene 12 (non-protein coding)	0.00013307	downregulated	0	0
229006_at	NA	NA	NA	0.00251235	0	0	upregulated
229011_at	NA	NA	NA	0.00268974	0	0	downregulated
229055_at	14q31	GPR68	G protein-coupled receptor 68	0.000128775	0	downregulated	downregulated
229064_s_at	1p35.3-p33	RCAN3	RCAN family member 3	3.54615e-05	downregulated	downregulated	downregulated
229111_at	NA	NA	NA	0.000366111	0	downregulated	downregulated
229126_at	12q21.1	TMEM19	transmembrane protein 19	2.34608e-05	0	downregulated	downregulated
229242_at	NA	NA	NA	4.25182e-05	0	downregulated	downregulated
229245_at	1q32.1	PLEKHA6	pleckstrin homology domain containing, family A member 6	0.000124114	downregulated	downregulated	0
229327_s_at	16q22-q23	MAF	v-maf musculoaponeurotic fibrosarcoma oncogene homolog (avian)	1.25787e-06	0	upregulated	upregulated
229353_s_at	1q32.1	NUCKS1	nuclear casein kinase and cyclin-dependent kinase substrate 1	0.00743482	upregulated	upregulated	upregulated
229360_at	22q11.22	ZNF280B	zinc finger protein 280B	0.00590585	0	0	upregulated
229377_at	13q34	GRTP1	growth hormone regulated TBC protein 1	1.2258e-06	0	downregulated	downregulated
229393_at	6q23	L3MBTL3	l(3)mbt-like 3 (Drosophila)	0.000775216	0	downregulated	0
229396_at	11q13	OVOL1	ovo-like 1(Drosophila)	0.00175339	0	downregulated	downregulated
229417_at	NA	NA	NA	0.0377495	0	downregulated	downregulated
229465_s_at	19p13.3	PTPRS	protein tyrosine phosphatase, receptor type, S	0.00256385	0	0	downregulated
229512_at	Xp11.22	FAM120C	family with sequence similarity 120C	0.00380759	0	upregulated	upregulated
229544_at	NA	NA	NA	1.17399e-05	0	0	downregulated
229578_at	20q13.12	JPH2	junctophilin 2	5.48088e-06	0	downregulated	downregulated
229586_at	16q12.2	CHD9	chromodomain helicase DNA binding protein 9	0.0100806	0	upregulated	upregulated
229638_at	16q12.2	IRX3	iroquois homeobox 3	0.000785754	0	upregulated	upregulated
229650_s_at	19p13.11	C19orf42	chromosome 19 open reading frame 42	0.0170023	0	upregulated	upregulated
229674_at	1q32.1-q41	SERTAD4	SERTA domain containing 4	0.000929833	0	downregulated	downregulated
229733_s_at	NA	NA	NA	0.0105412	0	0	downregulated
229764_at	3q28	TPRG1	tumor protein p63 regulated 1	0.00468984	0	0	downregulated
229779_at	2q35-q37	COL4A4	collagen, type IV, alpha 4	0.00692502	0	downregulated	downregulated
229787_s_at	Xq13	OGT	O-linked N-acetylglucosamine (GlcNAc) transferase (UDP-N-acetylglucosamine:polypeptide-N-acetylglucosaminyl transferase)	0.0435515	0	0	downregulated
229795_at	NA	NA	NA	0.00254488	0	0	downregulated
229811_at	NA	NA	NA	0.000113189	0	downregulated	0
229817_at	5q23.2	ZNF608	zinc finger protein 608	1.13727e-07	0	0	upregulated
229826_at	3p21.1	LOC440957	similar to CG32736-PA	0.00219729	upregulated	0	0
229830_at	7p22	PDGFA	platelet-derived growth factor alpha polypeptide	0.0201916	0	0	downregulated
229851_s_at	11q21	C11orf54	chromosome 11 open reading frame 54	0.0163038	0	0	downregulated
229871_at	19q13.2	SAMD4B	sterile alpha motif domain containing 4B	0.0263516	0	downregulated	0
229872_s_at	1q21.1	LOC100132999	hypothetical protein LOC100132999	0.000105025	0	downregulated	downregulated
229943_at	13q14	TRIM13	tripartite motif-containing 13	0.0168751	0	upregulated	0
230051_at	10p14	C10orf47	chromosome 10 open reading frame 47	3.7227e-06	0	downregulated	downregulated
230076_at	17p13	PITPNM3	PITPNM family member 3	6.25202e-07	downregulated	0	downregulated
230100_x_at	11q13-q14	PAK1	p21 protein (Cdc42/Rac)-activated kinase 1	4.02194e-06	downregulated	downregulated	downregulated
230146_s_at	9q34	FREQ	frequenin homolog (Drosophila)	0.000454083	upregulated	upregulated	upregulated
230188_at	5q33.3	ICHTHYIN	ichthyin protein	1.98555e-05	0	downregulated	downregulated
230200_at	10p12.33	NSUN6	NOL1/NOP2/Sun domain family, member 6	0.00235787	upregulated	upregulated	upregulated
230250_at	12q15-q21	PTPRB	protein tyrosine phosphatase, receptor type, B	0.00545223	0	downregulated	downregulated
230252_at	12p13.31	LPAR5	lysophosphatidic acid receptor 5	9.24634e-07	downregulated	downregulated	0
230257_s_at	1q25	TSEN15	tRNA splicing endonuclease 15 homolog (S. cerevisiae)	0.000193227	0	upregulated	upregulated
230266_at	1q32	RAB7B	RAB7B, member RAS oncogene family	1.33857e-06	downregulated	0	0
230316_at	22q12.2	SEC14L2	SEC14-like 2 (S. cerevisiae)	0.000223517	0	downregulated	downregulated
230372_at	8q24.12	HAS2	hyaluronan synthase 2	3.08112e-05	upregulated	0	downregulated
230389_at	9q34	FNBP1	formin binding protein 1	0.00513274	0	0	upregulated
230398_at	17q21.2	TNS4	tensin 4	0.00809908	0	downregulated	downregulated
230444_at	NA	NA	NA	0.0047267	0	0	upregulated
230464_at	19p13.2	S1PR5	sphingosine-1-phosphate receptor 5	2.34608e-05	0	upregulated	upregulated
230493_at	13q12.13	SHISA2	shisa homolog 2 (Xenopus laevis)	7.01118e-07	0	upregulated	upregulated
230502_s_at	20p13	LOC149832	hypothetical protein LOC149832	0.021673	0	0	downregulated
230585_at	NA	NA	NA	0.0443454	0	0	downregulated
230619_at	1q21	ARNT	aryl hydrocarbon receptor nuclear translocator	0.000174911	0	downregulated	downregulated
230660_at	1q32.1-q41	SERTAD4	SERTA domain containing 4	0.0138704	0	downregulated	downregulated
230666_at	7p15.2	HOXA11AS	HOXA11 antisense RNA (non-protein coding)	1.58427e-05	0	downregulated	0
230688_at	NA	NA	NA	0.00273834	0	0	upregulated
230710_at	NA	NA	NA	6.80372e-05	0	downregulated	downregulated
230713_at	NA	NA	NA	0.000475957	0	0	upregulated
230721_at	16p12.1	C16orf52	chromosome 16 open reading frame 52	0.000372724	0	0	downregulated
230778_at	NA	NA	NA	6.97947e-06	0	0	downregulated
230779_at	22q13.1	TNRC6B	trinucleotide repeat containing 6B	0.0254294	0	0	upregulated
230788_at	6p24.2	GCNT2	glucosaminyl (N-acetyl) transferase 2, I-branching enzyme (I blood group)	0.000121762	0	downregulated	downregulated
230793_at	6p22.2	LRRC16A	leucine rich repeat containing 16A	0.00138962	0	0	downregulated
230954_at	20q11.1-q11.23	C20orf112	chromosome 20 open reading frame 112	0.000698159	downregulated	downregulated	downregulated
230973_at	1p36.12	SH2D5	SH2 domain containing 5	2.06732e-05	0	upregulated	0
230986_at	Xp11.21	KLF8	Kruppel-like factor 8	8.08306e-05	0	downregulated	0
231102_at	7q21.1	CROT	carnitine O-octanoyltransferase	0.00634763	0	downregulated	0
231145_at	NA	NA	NA	5.76113e-05	0	upregulated	upregulated
231188_at	15q25.2	ZSCAN2	zinc finger and SCAN domain containing 2	0.00058611	0	upregulated	upregulated
231211_s_at	19q13.2	C19orf33	chromosome 19 open reading frame 33	0.00049229	0	upregulated	upregulated
231270_at	8q21.2	CA13	carbonic anhydrase XIII	8.91282e-05	0	downregulated	downregulated
231311_at	NA	NA	NA	0.000259806	0	downregulated	0
231365_at	NA	NA	NA	0.00152418	upregulated	upregulated	upregulated
231715_s_at	1q42.12	PYCR2	pyrroline-5-carboxylate reductase family, member 2	0.00648952	0	upregulated	upregulated
231771_at	13q11-q12.1	GJB6	gap junction protein, beta 6, 30kDa	3.44642e-05	0	upregulated	0
231779_at	3p25.3	IRAK2	interleukin-1 receptor-associated kinase 2	0.00246588	0	0	downregulated
231786_at	7p15-p14	HOXA13	homeobox A13	0.000114349	0	0	upregulated
231798_at	17q21-q22	NOG	noggin	5.71049e-05	upregulated	upregulated	0
231807_at	10p12.2-p12.1	KIAA1217	KIAA1217	4.36521e-06	downregulated	downregulated	downregulated
231821_x_at	4q26	LOC729218	hypothetical LOC729218	0.000822381	downregulated	downregulated	0
231837_at	11q23	USP28	ubiquitin specific peptidase 28	0.000281249	0	downregulated	downregulated
231867_at	5q34-q35.1	ODZ2	odz, odd Oz/ten-m homolog 2 (Drosophila)	0.0178326	0	0	downregulated
231907_at	1q24-q25	ABL2	v-abl Abelson murine leukemia viral oncogene homolog 2 (arg, Abelson-related gene)	3.08323e-05	0	downregulated	downregulated
231969_at	4q35.1	STOX2	storkhead box 2	0.00349759	downregulated	0	upregulated
232024_at	7q36.1	GIMAP2	GTPase, IMAP family member 2	7.42793e-05	0	downregulated	0
232034_at	9q21.11	LOC203274	hypothetical protein LOC203274	1.76157e-05	0	0	upregulated
232053_x_at	7q11.23	RHBDD2	rhomboid domain containing 2	0.0292591	0	0	upregulated
232067_at	6q16.2-q16.3	C6orf168	chromosome 6 open reading frame 168	0.000800989	0	downregulated	0
232176_at	13q31.1	SLITRK6	SLIT and NTRK-like family, member 6	1.81423e-05	0	upregulated	upregulated
232181_at	5q33.1	LOC153346	hypothetical protein LOC153346	0.000421704	downregulated	upregulated	0
232183_at	6q25.3	SERAC1	serine active site containing 1	0.000480288	0	downregulated	downregulated
232198_at	NA	NA	NA	0.0115191	upregulated	upregulated	upregulated
232231_at	6p21	RUNX2	runt-related transcription factor 2	0.000728989	0	downregulated	downregulated
232263_at	12q21.3	SLC6A15	solute carrier family 6 (neutral amino acid transporter), member 15	0.0024725	0	0	downregulated
232291_at	13q31.3	MIRHG1	microRNA host gene 1 (non-protein coding)	0.0169023	0	0	downregulated
232311_at	15q21-q22.2	B2M	beta-2-microglobulin	0.0106822	0	upregulated	upregulated
232330_at	7p13	C7orf44	chromosome 7 open reading frame 44	5.57325e-05	0	downregulated	downregulated
232360_at	11p12	EHF	ets homologous factor	0.000561261	0	0	upregulated
232369_at	NA	NA	NA	0.00938085	0	0	upregulated
232406_at	NA	NA	NA	0.003434	0	0	upregulated
232481_s_at	13q31.1	SLITRK6	SLIT and NTRK-like family, member 6	4.83352e-05	0	0	upregulated
232500_at	20p11.22	C20orf74	chromosome 20 open reading frame 74	0.00960963	0	0	upregulated
232530_at	3q26	PLD1	phospholipase D1, phosphatidylcholine-specific	0.000785692	0	0	upregulated
232552_at	14q23.1	DAAM1	dishevelled associated activator of morphogenesis 1	0.0264467	0	0	upregulated
232596_at	13q21.2	DIAPH3	diaphanous homolog 3 (Drosophila)	0.00415534	0	0	downregulated
232653_at	NA	NA	NA	0.0057283	0	upregulated	upregulated
232676_x_at	15q21.1	MYEF2	myelin expression factor 2	0.0341103	0	downregulated	0
232693_s_at	8p21.1	ZNF395	zinc finger protein 395	0.0203659	0	downregulated	0
232746_at	2q37.3	CXCR7	chemokine (C-X-C motif) receptor 7	0.00040314	downregulated	downregulated	0
232780_s_at	1p34.2	ZNF691	zinc finger protein 691	0.00205604	0	upregulated	upregulated
232935_at	NA	NA	NA	0.00289663	0	0	upregulated
232968_at	10q26.2	FANK1	fibronectin type III and ankyrin repeat domains 1	5.37152e-07	0	downregulated	downregulated
233180_at	NA	NA	NA	7.42144e-06	downregulated	0	0
233230_s_at	4p12	SLAIN2	SLAIN motif family, member 2	0.0484085	0	0	downregulated
233289_at	NA	NA	NA	0.00436319	0	downregulated	0
233329_s_at	2p11.2	KRCC1	lysine-rich coiled-coil 1	0.0100853	0	upregulated	0
233417_at	NA	NA	NA	0.00228191	0	0	upregulated
233565_s_at	20p13	SDCBP2	syndecan binding protein (syntenin) 2	0.000322228	0	0	upregulated
233851_s_at	1q25.2	TOR3A	torsin family 3, member A	0.0058362	0	upregulated	upregulated
234219_at	NA	NA	NA	0.00905673	0	0	downregulated
234608_at	18q11.2	LAMA3	laminin, alpha 3	0.0224077	0	0	upregulated
234699_at	14q11.2	RNASE7	ribonuclease, RNase A family, 7	4.81118e-05	upregulated	upregulated	upregulated
234942_s_at	1p34.3	THRAP3	thyroid hormone receptor associated protein 3	0.00259276	upregulated	upregulated	upregulated
234976_x_at	2p13	SLC4A5	solute carrier family 4, sodium bicarbonate cotransporter, member 5	1.25801e-05	0	upregulated	0
235004_at	6p22.3	RBM24	RNA binding motif protein 24	1.92337e-05	0	downregulated	downregulated
235010_at	11p15.3	LOC729013	hypothetical protein LOC729013	7.56049e-05	0	0	downregulated
235023_at	15q22.2	VPS13C	vacuolar protein sorting 13 homolog C (S. cerevisiae)	0.00384218	0	upregulated	upregulated
235026_at	12q14.2	C12orf66	chromosome 12 open reading frame 66	0.000262315	upregulated	upregulated	0
235059_at	18p11.22	RAB12	RAB12, member RAS oncogene family	0.00694076	0	0	downregulated
235086_at	15q15	THBS1	thrombospondin 1	0.000485826	0	downregulated	downregulated
235094_at	NA	NA	NA	0.00422307	0	upregulated	upregulated
235102_x_at	NA	NA	NA	9.77046e-06	upregulated	upregulated	upregulated
235124_at	15q15.3	LOC645212	hypothetical LOC645212	0.000293941	0	downregulated	downregulated
235199_at	18q12.1	RNF125	ring finger protein 125	0.001655	0	upregulated	0
235226_at	6q21	CDC2L6	cell division cycle 2-like 6 (CDK8-like)	0.00151994	0	downregulated	downregulated
235230_at	3q13.2	PLCXD2	phosphatidylinositol-specific phospholipase C, X domain containing 2	0.0382425	0	downregulated	0
235247_at	NA	NA	NA	0.000179274	0	downregulated	downregulated
235251_at	NA	NA	NA	8.1544e-05	0	upregulated	upregulated
235301_at	7q21.12	KIAA1324L	KIAA1324-like	0.000544086	0	downregulated	downregulated
235337_at	NA	NA	NA	9.91096e-05	0	downregulated	downregulated
235347_at	3q29	LRCH3	leucine-rich repeats and calponin homology (CH) domain containing 3	0.000659847	downregulated	downregulated	downregulated
235352_at	NA	NA	NA	2.07881e-05	0	0	downregulated
235360_at	NA	NA	NA	0.000110906	downregulated	downregulated	0
235457_at	11q21	MAML2	mastermind-like 2 (Drosophila)	0.000662129	0	downregulated	downregulated
235497_at	1p36.33	LOC643837	hypothetical LOC643837	0.00087333	0	upregulated	upregulated
235521_at	7p15-p14	HOXA3	homeobox A3	5.31515e-06	downregulated	downregulated	downregulated
235583_at	3q13.33	ILDR1	immunoglobulin-like domain containing receptor 1	3.64205e-06	0	downregulated	0
235646_at	NA	NA	NA	0.00119244	downregulated	0	0
235651_at	NA	NA	NA	2.88242e-05	0	downregulated	downregulated
235695_at	2q11.2	INPP4A	inositol polyphosphate-4-phosphatase, type I, 107kDa	3.10281e-05	downregulated	downregulated	downregulated
235709_at	12q23.1	GAS2L3	growth arrest-specific 2 like 3	0.0188415	upregulated	0	0
235737_at	5q22.1	TSLP	thymic stromal lymphopoietin	1.17393e-05	upregulated	upregulated	upregulated
235756_at	NA	NA	NA	5.52971e-05	0	downregulated	downregulated
235773_at	19q13.43	ZIK1	zinc finger protein interacting with K protein 1 homolog (mouse)	0.000129503	downregulated	downregulated	0
235783_at	1p36.13	MRTO4	mRNA turnover 4 homolog (S. cerevisiae)	0.000365341	0	upregulated	0
235844_at	1p13	PHTF1	putative homeodomain transcription factor 1	0.010523	0	downregulated	0
235857_at	17p13.1	KCTD11	potassium channel tetramerisation domain containing 11	3.45238e-05	0	downregulated	downregulated
235882_at	17p13.3	VPS53	vacuolar protein sorting 53 homolog (S. cerevisiae)	6.32672e-05	downregulated	downregulated	downregulated
235925_at	15q21	TCF12	transcription factor 12	0.00901801	0	0	upregulated
235927_at	2p16	XPO1	exportin 1 (CRM1 homolog, yeast)	0.0315413	0	upregulated	upregulated
235976_at	13q31.1	SLITRK6	SLIT and NTRK-like family, member 6	1.43627e-05	0	upregulated	upregulated
236029_at	11q14.3	FAT3	FAT tumor suppressor homolog 3 (Drosophila)	0.00739099	0	downregulated	0
236079_at	4p16.1	DKFZp667E0512	hypothetical protein DKFZp667E0512	0.00111784	0	downregulated	0
236164_at	NA	NA	NA	0.000875092	0	downregulated	downregulated
236359_at	11q23.3	SCN4B	sodium channel, voltage-gated, type IV, beta	5.11352e-05	0	0	downregulated
236369_at	NA	NA	NA	0.000528518	0	0	upregulated
236379_at	NA	NA	NA	0.00200072	0	0	upregulated
236513_at	NA	NA	NA	0.000297618	0	downregulated	downregulated
236557_at	3q23	ZBTB38	zinc finger and BTB domain containing 38	2.17905e-05	upregulated	upregulated	upregulated
236599_at	NA	NA	NA	0.000923624	upregulated	0	0
236607_at	NA	NA	NA	0.00378122	0	0	upregulated
236620_at	2q23.3	RIF1	RAP1 interacting factor homolog (yeast)	0.000359817	upregulated	upregulated	upregulated
236646_at	12p13.2	C12orf59	chromosome 12 open reading frame 59	0.00156083	0	0	downregulated
236656_s_at	NA	LOC100130506	hypothetical protein LOC100130506	0.00264794	0	downregulated	downregulated
236685_at	NA	NA	NA	0.0172758	0	0	upregulated
236796_at	6q15	BACH2	BTB and CNC homology 1, basic leucine zipper transcription factor 2	0.00635357	0	downregulated	downregulated
236837_x_at	13q12.11	LOC650794	similar to FRAS1 related extracellular matrix protein 2	0.0174285	0	0	downregulated
236982_at	NA	NA	NA	0.000222755	0	0	downregulated
237097_at	NA	NA	NA	0.000531427	0	downregulated	downregulated
237252_at	20p11.2	THBD	thrombomodulin	1.52821e-06	0	0	downregulated
237383_at	NA	NA	NA	0.0244551	0	0	upregulated
237411_at	5q12	ADAMTS6	ADAM metallopeptidase with thrombospondin type 1 motif, 6	5.91964e-08	0	0	downregulated
237483_at	NA	NA	NA	0.00771754	0	0	upregulated
237561_x_at	NA	NA	NA	0.000542031	0	0	upregulated
237680_at	NA	NA	NA	3.3465e-07	0	0	downregulated
237732_at	NA	NA	NA	0.00147088	upregulated	0	0
238005_s_at	15q24.2	SIN3A	SIN3 homolog A, transcription regulator (yeast)	1.72506e-05	0	downregulated	0
238017_at	8q12.1	SDR16C5	short chain dehydrogenase/reductase family 16C, member 5	0.0445556	0	0	downregulated
238039_at	5q14.1	LOC728769	hypothetical protein LOC728769	0.000393769	0	downregulated	downregulated
238049_at	5q23.2	GRAMD3	GRAM domain containing 3	0.00265589	upregulated	0	upregulated
238076_at	1q21.3	GATAD2B	GATA zinc finger domain containing 2B	2.18988e-05	downregulated	downregulated	0
238151_at	NA	NA	NA	0.0013275	0	0	downregulated
238156_at	NA	NA	NA	0.00253629	upregulated	upregulated	0
238417_at	11q13.4	PGM2L1	phosphoglucomutase 2-like 1	0.00362832	0	0	upregulated
238430_x_at	17q12	SLFN5	schlafen family member 5	0.00275165	upregulated	0	0
238482_at	2q32	KLF7	Kruppel-like factor 7 (ubiquitous)	0.000263938	0	downregulated	downregulated
238520_at	6p21.1-p12.1	TRERF1	transcriptional regulating factor 1	0.00446574	0	downregulated	0
238549_at	20q11	CBFA2T2	core-binding factor, runt domain, alpha subunit 2; translocated to, 2	6.30969e-06	0	upregulated	upregulated
238571_at	NA	NA	NA	2.31811e-05	0	upregulated	upregulated
238584_at	2q37.2-q37.3	IQCA1	IQ motif containing with AAA domain 1	0.000652292	0	0	downregulated
238722_x_at	7q22.1	NAPEPLD	N-acyl phosphatidylethanolamine phospholipase D	0.00128171	0	upregulated	upregulated
238733_at	NA	NA	NA	2.40392e-08	downregulated	0	upregulated
238735_at	NA	NA	NA	0.00455208	0	0	upregulated
238741_at	8q24.13	FAM83A	family with sequence similarity 83, member A	0.00816326	0	upregulated	0
238751_at	NA	NA	NA	0.0154535	upregulated	0	0
238793_at	16p13.3	TIGD7	tigger transposable element derived 7	0.00654797	0	downregulated	0
238808_at	NA	NA	NA	0.000785266	0	upregulated	upregulated
238827_at	NA	NA	NA	0.000106365	0	downregulated	downregulated
238847_at	NA	NA	NA	4.34243e-05	downregulated	downregulated	0
238931_at	17p13.3	METT10D	methyltransferase 10 domain containing	0.000134271	downregulated	downregulated	downregulated
238967_at	NA	NA	NA	0.00115855	0	0	upregulated
238987_at	9p13	B4GALT1	UDP-Gal:betaGlcNAc beta 1,4- galactosyltransferase, polypeptide 1	0.00210725	0	upregulated	upregulated
239272_at	17q11-q21.1	MMP28	matrix metallopeptidase 28	0.000121558	0	0	downregulated
239278_at	NA	NA	NA	0.000301536	0	0	downregulated
239347_at	NA	NA	NA	6.5063e-05	downregulated	downregulated	downregulated
239393_at	NA	NA	NA	0.0103099	0	0	upregulated
239410_at	NA	NA	NA	0.000123292	0	upregulated	0
239430_at	19q13.32	IGFL1	IGF-like family member 1	0.0270657	0	0	upregulated
239451_at	NA	NA	NA	0.00195047	0	upregulated	0
239744_at	NA	NA	NA	8.98038e-05	downregulated	downregulated	downregulated
239792_at	15q24.1	LOC440288	similar to FLJ16518 protein	0.0195575	0	downregulated	0
239934_x_at	NA	NA	NA	0.000220517	0	downregulated	0
239944_at	NA	NA	NA	0.0248855	0	downregulated	0
239973_at	NA	NA	NA	0.000891689	downregulated	0	0
240259_at	14q24-q32	FLRT2	fibronectin leucine rich transmembrane protein 2	0.00297218	0	downregulated	0
240432_x_at	NA	NA	NA	3.36043e-05	0	downregulated	downregulated
240633_at	4p16.2	DOK7	docking protein 7	8.81348e-07	downregulated	downregulated	downregulated
240983_s_at	11p15.5	CARS	cysteinyl-tRNA synthetase	0.00144785	0	upregulated	0
240991_at	NA	NA	NA	0.000220086	0	upregulated	upregulated
241355_at	8p21.2	HR	hairless homolog (mouse)	7.0861e-05	0	upregulated	0
241370_at	8q24.13	LOC286052	hypothetical protein LOC286052	0.010305	0	downregulated	downregulated
241722_x_at	NA	NA	NA	0.00674843	upregulated	0	0
241751_at	Xp22	OFD1	oral-facial-digital syndrome 1	0.0226007	downregulated	0	0
241773_at	NA	NA	NA	0.00111784	0	0	downregulated
241837_at	NA	NA	NA	2.04287e-05	0	upregulated	upregulated
241954_at	8p23.1-p22	FDFT1	farnesyl-diphosphate farnesyltransferase 1	0.00673343	downregulated	0	downregulated
241990_at	15q13.3	RHOV	ras homolog gene family, member V	0.000377159	0	upregulated	upregulated
241991_at	NA	NA	NA	8.96384e-06	downregulated	downregulated	downregulated
242005_at	NA	NA	NA	4.12868e-07	0	0	downregulated
242028_at	19p13.2	ZNF443	zinc finger protein 443	0.000387287	0	upregulated	upregulated
242056_at	1p13.1	TRIM45	tripartite motif-containing 45	0.000339564	0	0	upregulated
242127_at	NA	NA	NA	6.92977e-06	0	downregulated	downregulated
242138_at	2q32	DLX1	distal-less homeobox 1	1.38307e-05	0	0	upregulated
242176_at	15q26	MEF2A	myocyte enhancer factor 2A	0.00178106	0	downregulated	downregulated
242196_at	11q24-q25	RICS	Rho GTPase-activating protein	6.16888e-05	downregulated	downregulated	0
242321_at	NA	NA	NA	0.000494148	0	downregulated	downregulated
242397_at	NA	NA	NA	3.62503e-07	upregulated	upregulated	upregulated
242471_at	NA	NA	NA	0.0215319	0	0	upregulated
242617_at	14q24.3	TMED8	transmembrane emp24 protein transport domain containing 8	0.00758027	upregulated	0	upregulated
242691_at	NA	NA	NA	0.0199918	0	0	downregulated
242722_at	13q22.2	LMO7	LIM domain 7	0.0016799	upregulated	upregulated	upregulated
242738_s_at	16q22.3-q23.1	ZFHX3	zinc finger homeobox 3	0.0013727	0	downregulated	downregulated
242800_at	Xp22.13	NHS	Nance-Horan syndrome (congenital cataracts and dental anomalies)	0.0143724	upregulated	0	0
242871_at	15q23	PAQR5	progestin and adipoQ receptor family member V	0.00130196	0	0	downregulated
242963_at	4q25	SGMS2	sphingomyelin synthase 2	0.000269576	0	0	downregulated
242979_at	2q36	IRS1	insulin receptor substrate 1	0.0051509	0	0	downregulated
243007_at	NA	NA	NA	0.0018809	downregulated	downregulated	downregulated
243252_at	NA	NA	NA	2.2571e-05	0	0	downregulated
243295_at	5q32	RBM27	RNA binding motif protein 27	0.0446649	upregulated	0	0
243386_at	1p36.22	CASZ1	castor zinc finger 1	2.75822e-05	0	downregulated	0
243395_at	NA	NA	NA	0.000643019	0	upregulated	upregulated
243529_at	2q33.1	MARS2	methionyl-tRNA synthetase 2, mitochondrial	0.00012153	0	upregulated	0
243582_at	5q32	SH3RF2	SH3 domain containing ring finger 2	3.51377e-06	0	downregulated	downregulated
243611_at	11p15.3	MICALCL	MICAL C-terminal like	0.0166362	0	0	downregulated
243618_s_at	4q31.22	ZNF827	zinc finger protein 827	2.32901e-05	0	downregulated	upregulated
243846_x_at	NA	NA	NA	0.0326628	0	0	upregulated
243871_at	6q23.3	LOC100130476	similar to hCG2036711	3.30373e-06	0	downregulated	downregulated
243999_at	17q12	SLFN5	schlafen family member 5	0.000192456	0	0	downregulated
244054_at	NA	NA	NA	0.000119071	0	downregulated	0
244261_at	1p36.11	IL28RA	interleukin 28 receptor, alpha (interferon, lambda receptor)	0.000216821	0	0	upregulated
244287_at	5q12.3	SFRS12	splicing factor, arginine/serine-rich 12	6.64067e-05	upregulated	upregulated	upregulated
244353_s_at	6q23.2	SLC2A12	solute carrier family 2 (facilitated glucose transporter), member 12	2.45307e-06	0	downregulated	downregulated
244447_at	NA	NA	NA	9.89855e-06	0	0	upregulated
244470_at	Xq13-q21	RLIM	ring finger protein, LIM domain interacting	0.000660485	upregulated	0	upregulated
244579_at	NA	NA	NA	0.0114098	0	upregulated	upregulated
244633_at	NA	NA	NA	0.00891725	0	0	upregulated
244754_at	NA	NA	NA	0.0178528	0	upregulated	upregulated
34408_at	19q13.32	RTN2	reticulon 2	0.000333596	0	downregulated	downregulated
35666_at	3p21.3	SEMA3F	sema domain, immunoglobulin domain (Ig), short basic domain, secreted, (semaphorin) 3F	8.38347e-06	downregulated	downregulated	downregulated
36711_at	22q13.1	MAFF	v-maf musculoaponeurotic fibrosarcoma oncogene homolog F (avian)	0.000158418	0	downregulated	downregulated
38037_at	5q23	HBEGF	heparin-binding EGF-like growth factor	1.83003e-05	upregulated	upregulated	0
39402_at	2q14	IL1B	interleukin 1, beta	1.61669e-08	upregulated	0	downregulated
40016_g_at	5q12.3	MAST4	microtubule associated serine/threonine kinase family member 4	0.00215415	0	downregulated	downregulated
46665_at	2q11.2	SEMA4C	sema domain, immunoglobulin domain (Ig), transmembrane domain (TM) and short cytoplasmic domain, (semaphorin) 4C	5.3941e-06	0	upregulated	upregulated
50314_i_at	20p13	C20orf27	chromosome 20 open reading frame 27	0.0289477	0	upregulated	0
53720_at	19p13.2	C19orf66	chromosome 19 open reading frame 66	1.61521e-07	0	downregulated	downregulated
55065_at	19q13.3	MARK4	MAP/microtubule affinity-regulating kinase 4	0.00776542	0	downregulated	downregulated
58780_s_at	14q11.2	FLJ10357	hypothetical protein FLJ10357	3.46765e-05	0	downregulated	downregulated
65472_at	2p11.2	C2orf68	chromosome 2 open reading frame 68	3.64205e-06	downregulated	downregulated	downregulated
65585_at	8p23.1	FAM86B1	family with sequence similarity 86, member B1	0.00957283	0	upregulated	0
65588_at	20q11.23	LOC388796	hypothetical LOC388796	0.000411984	upregulated	upregulated	0
AFFX-DapX-M_at	NA	NA	NA	0.0141447	0	0	downregulated
AFFX-HSAC07/X00351_5_at	7p15-p12	ACTB	actin, beta	0.000359817	0	upregulated	upregulated
AFFX-HUMISGF3A/M97935_3_at	2q32.2	STAT1	signal transducer and activator of transcription 1, 91kDa	8.77631e-06	0	0	downregulated
AFFX-HUMISGF3A/M97935_MA_at	2q32.2	STAT1	signal transducer and activator of transcription 1, 91kDa	2.02965e-05	0	0	downregulated
AFFX-HUMISGF3A/M97935_MB_at	2q32.2	STAT1	signal transducer and activator of transcription 1, 91kDa	0.00151026	0	0	downregulated
AFFX-r2-Bs-dap-M_at	NA	NA	NA	0.0285681	0	0	downregulated

## Sheet: Table S1b
Table S1b. Differentially expressed genes in the different time points in PrSF cells.
ID	LOCUS	SYMBOL	Descr	F.p.value.adj	1h.0h	3h.h0	6h.0h
1552487_a_at	15q25.2	BNC1	basonuclin 1	0.00012376	0	upregulated	0
1552658_a_at	12q14.3	NAV3	neuron navigator 3	0.00995429	0	upregulated	0
1553229_at	8q24.13	ZNF572	zinc finger protein 572	0.0045661	0	0	upregulated
1553275_s_at	NA	NA	NA	0.0022137	0	downregulated	downregulated
1553286_at	19p13.3	ZNF555	zinc finger protein 555	0.00696468	0	0	upregulated
1553348_a_at	9p13.3	NFX1	nuclear transcription factor, X-box binding 1	0.0208915	0	0	upregulated
1553613_s_at	6p25	FOXC1	forkhead box C1	0.000300337	0	upregulated	upregulated
1553672_at	1q42.12	ENAH	enabled homolog (Drosophila)	0.00762578	0	0	upregulated
1553708_at	7p12.3	MGC16075	hypothetical protein MGC16075	9.41868e-05	0	upregulated	0
1553719_s_at	19q13.43	ZNF548	zinc finger protein 548	0.00702446	0	downregulated	downregulated
1553764_a_at	14q11.2	JUB	jub, ajuba homolog (Xenopus laevis)	0.00135852	0	upregulated	upregulated
1553844_a_at	10p12.2	C10orf67	chromosome 10 open reading frame 67	0.000236223	0	upregulated	upregulated
1553978_at	19p13.11	MEF2B	myocyte enhancer factor 2B	0.0309391	0	0	upregulated
1554020_at	12p11.2-p11.1	BICD1	bicaudal D homolog 1 (Drosophila)	7.0679e-05	0	upregulated	0
1554036_at	6q21	ZBTB24	zinc finger and BTB domain containing 24	6.26191e-06	0	0	downregulated
1554079_at	11p15.3	GALNTL4	UDP-N-acetyl-alpha-D-galactosamine:polypeptide N-acetylgalactosaminyltransferase-like 4	0.0476047	0	0	upregulated
1554114_s_at	17q11.2	SSH2	slingshot homolog 2 (Drosophila)	0.00628421	0	upregulated	upregulated
1554415_at	1q42.13	TAF5L	TAF5-like RNA polymerase II, p300/CBP-associated factor (PCAF)-associated factor, 65kDa	0.000302943	0	upregulated	upregulated
1554479_a_at	19q13.32	CARD8	caspase recruitment domain family, member 8	0.000287328	0	downregulated	downregulated
1554520_at	16q24.3	LOC283861	hypothetical locus LOC283861	0.0284207	0	0	upregulated
1554609_at	11q14	POLD3	polymerase (DNA-directed), delta 3, accessory subunit	0.0420353	0	downregulated	0
1554628_at	19p13.3	ZNF57	zinc finger protein 57	0.0240653	0	0	upregulated
1554769_at	16p11.2	ZNF785	zinc finger protein 785	0.00875419	0	0	upregulated
1554770_x_at	16p11.2	ZNF785	zinc finger protein 785	0.00296755	0	0	upregulated
1554807_a_at	18p11.21	SPIRE1	spire homolog 1 (Drosophila)	0.00231813	0	upregulated	upregulated
1554878_a_at	1p22-p21	ABCD3	ATP-binding cassette, sub-family D (ALD), member 3	0.000131999	0	upregulated	upregulated
1554960_at	1q23.3	C1orf110	chromosome 1 open reading frame 110	3.54106e-07	downregulated	upregulated	downregulated
1554966_a_at	3q12.1	FILIP1L	filamin A interacting protein 1-like	0.0171332	0	0	downregulated
1555037_a_at	2q33.3	IDH1	isocitrate dehydrogenase 1 (NADP+), soluble	0.00286644	0	downregulated	downregulated
1555279_at	3q22.3	ARMC8	armadillo repeat containing 8	0.0399536	0	0	upregulated
1555281_x_at	3q22.3	ARMC8	armadillo repeat containing 8	0.016149	0	0	upregulated
1555355_a_at	11q23.3	ETS1	v-ets erythroblastosis virus E26 oncogene homolog 1 (avian)	0.000776442	0	upregulated	upregulated
1555420_a_at	2q32	KLF7	Kruppel-like factor 7 (ubiquitous)	0.00451674	0	0	downregulated
1555427_s_at	6q14-q15	SYNCRIP	synaptotagmin binding, cytoplasmic RNA interacting protein	0.00717356	0	0	upregulated
1555461_at	NA	NA	NA	0.0194787	0	0	upregulated
1555486_a_at	11p13-p12	FLJ14213	protor-2	0.0119883	0	0	upregulated
1555673_at	17q12-q21	KRTAP2-1	keratin associated protein 2-1	2.40293e-05	0	upregulated	0
1555724_s_at	11q23.2	TAGLN	transgelin	0.000343618	0	upregulated	upregulated
1555832_s_at	10p15	KLF6	Kruppel-like factor 6	2.38141e-05	0	downregulated	downregulated
1555847_a_at	19p13.13	LOC284454	hypothetical protein LOC284454	0.0164787	0	upregulated	0
1555878_at	10q22-q23	RPS24	ribosomal protein S24	0.00362425	0	0	upregulated
1555912_at	7q31.1-q31.2	ST7OT1	ST7 overlapping transcript 1 (non-protein coding)	0.0260145	0	upregulated	upregulated
1555967_at	NA	NA	NA	0.0367196	0	0	upregulated
1555976_s_at	18p11.31	MYL12A	myosin, light chain 12A, regulatory, non-sarcomeric	2.27962e-05	0	0	downregulated
1555977_at	NA	NA	NA	0.00026994	0	downregulated	downregulated
1555978_s_at	NA	NA	NA	4.99074e-05	0	0	downregulated
1555980_a_at	1p36.33	FLJ39609	hypothetical protein FLJ39609	0.00909824	0	upregulated	upregulated
1556037_s_at	4q28-q32	HHIP	hedgehog interacting protein	0.00255692	0	upregulated	upregulated
1556064_at	22q13.31	LOC284926	hypothetical protein LOC284926	0.00251673	0	0	upregulated
1556180_at	5q35.3	LOC729678	hypothetical protein LOC729678	0.00874769	0	downregulated	0
1556216_s_at	NA	NA	NA	0.00315566	0	0	upregulated
1556385_at	NA	NA	NA	0.00117848	0	upregulated	0
1556582_at	19q13.2	PVR	poliovirus receptor	0.0103309	0	upregulated	0
1557257_at	1p22	BCL10	B-cell CLL/lymphoma 10	0.000336876	0	0	downregulated
1557258_a_at	1p22	BCL10	B-cell CLL/lymphoma 10	0.0297564	0	0	downregulated
1557315_a_at	NA	NA	NA	0.0028713	0	downregulated	0
1557331_at	2q13	POLR1B	polymerase (RNA) I polypeptide B, 128kDa	0.00420693	0	0	upregulated
1557352_at	8q24.1	SQLE	squalene epoxidase	0.00899285	0	0	upregulated
1557458_s_at	9p13.2-p13.1	SHB	Src homology 2 domain containing adaptor protein B	0.0349662	0	upregulated	0
1557459_at	NA	NA	NA	0.0179061	0	0	downregulated
1557578_at	3q13.2	PHLDB2	pleckstrin homology-like domain, family B, member 2	0.0147401	0	0	downregulated
1558115_at	9p13.3	RECK	reversion-inducing-cysteine-rich protein with kazal motifs	0.00575649	0	0	upregulated
1558116_x_at	9p13.3	RECK	reversion-inducing-cysteine-rich protein with kazal motifs	0.0240375	0	0	upregulated
1558195_at	12q13.13	LOC283404	hypothetical protein LOC283404	0.00187372	0	upregulated	upregulated
1558199_at	2q34	FN1	fibronectin 1	0.00538642	0	downregulated	downregulated
1558220_at	3q29	LOC440993	hypothetical gene supported by AK128346	0.00432302	0	0	upregulated
1558292_s_at	17q12	PIGW	phosphatidylinositol glycan anchor biosynthesis, class W	0.00493835	0	0	upregulated
1558837_a_at	NA	NA	NA	0.016965	0	0	downregulated
1559064_at	6p22.3	NUP153	nucleoporin 153kDa	0.00422972	0	upregulated	upregulated
1559249_at	6p23	ATXN1	ataxin 1	7.01392e-06	0	upregulated	0
1559942_at	7q31.1-q31.2	MDFIC	MyoD family inhibitor domain containing	0.0329799	0	0	upregulated
1560258_a_at	NA	NA	NA	0.0331552	0	downregulated	0
1560297_at	NA	NA	NA	0.032103	0	0	upregulated
1560477_a_at	1p36.33	SAMD11	sterile alpha motif domain containing 11	0.000399034	0	upregulated	upregulated
1561181_at	NA	NA	NA	0.00199356	0	downregulated	downregulated
1562415_a_at	1p35.2	SPOCD1	SPOC domain containing 1	1.28954e-05	0	0	downregulated
1563469_at	NA	NA	NA	0.00181861	0	downregulated	downregulated
1564796_at	12p12.3	EMP1	epithelial membrane protein 1	0.00755454	0	0	downregulated
1566482_at	NA	NA	NA	8.84707e-05	0	downregulated	downregulated
1566901_at	18p11.3	TGIF1	TGFB-induced factor homeobox 1	0.00430063	0	upregulated	0
1568597_at	7p15.1	LOC646762	hypothetical LOC646762	0.00978862	0	0	upregulated
1569003_at	17q23.1	TMEM49	transmembrane protein 49	0.000300337	0	upregulated	0
1569149_at	5q35.3	PDLIM7	PDZ and LIM domain 7 (enigma)	0.00364546	0	downregulated	downregulated
1570153_at	13q13.3	SOHLH2	spermatogenesis and oogenesis specific basic helix-loop-helix 2	0.00356513	0	0	downregulated
1570155_at	NA	NA	NA	0.00439491	0	0	upregulated
200606_at	6p24	DSP	desmoplakin	0.00819659	0	0	upregulated
200621_at	1q32	CSRP1	cysteine and glycine-rich protein 1	0.00021616	0	upregulated	upregulated
200666_s_at	19p13.2	DNAJB1	DnaJ (Hsp40) homolog, subfamily B, member 1	0.00248566	0	downregulated	0
200690_at	5q31.1	HSPA9	heat shock 70kDa protein 9 (mortalin)	0.00196901	0	upregulated	upregulated
200704_at	16p13.13	LITAF	lipopolysaccharide-induced TNF factor	0.0261424	0	upregulated	upregulated
200706_s_at	16p13.13	LITAF	lipopolysaccharide-induced TNF factor	0.0086598	0	upregulated	upregulated
200730_s_at	6q12	PTP4A1	protein tyrosine phosphatase type IVA, member 1	0.00638732	0	upregulated	upregulated
200731_s_at	6q12	PTP4A1	protein tyrosine phosphatase type IVA, member 1	0.000169475	0	upregulated	upregulated
200732_s_at	6q12	PTP4A1	protein tyrosine phosphatase type IVA, member 1	0.000287563	upregulated	upregulated	upregulated
200733_s_at	6q12	PTP4A1	protein tyrosine phosphatase type IVA, member 1	0.00942023	0	0	upregulated
200797_s_at	1q21	MCL1	myeloid cell leukemia sequence 1 (BCL2-related)	0.000793639	0	downregulated	downregulated
200810_s_at	19p13.3	CIRBP	cold inducible RNA binding protein	0.00323512	0	0	upregulated
200811_at	19p13.3	CIRBP	cold inducible RNA binding protein	0.0127617	0	0	upregulated
200874_s_at	20p13	NOP56	NOP56 ribonucleoprotein homolog (yeast)	0.0061032	0	0	upregulated
200897_s_at	4q32.3	PALLD	palladin, cytoskeletal associated protein	0.000906479	0	upregulated	upregulated
200906_s_at	4q32.3	PALLD	palladin, cytoskeletal associated protein	0.000169475	0	upregulated	upregulated
200907_s_at	4q32.3	PALLD	palladin, cytoskeletal associated protein	0.000842735	0	upregulated	upregulated
200924_s_at	11q13	SLC3A2	solute carrier family 3 (activators of dibasic and neutral amino acid transport), member 2	0.000501216	0	upregulated	upregulated
200959_at	16p11.2	FUS	fusion (involved in t(12;16) in malignant liposarcoma)	0.000269776	0	upregulated	upregulated
201008_s_at	1q21.1	TXNIP	thioredoxin interacting protein	6.68131e-05	0	downregulated	0
201009_s_at	1q21.1	TXNIP	thioredoxin interacting protein	1.96037e-06	0	downregulated	0
201010_s_at	1q21.1	TXNIP	thioredoxin interacting protein	3.11878e-07	0	downregulated	downregulated
201037_at	10p15.3-p15.2	PFKP	phosphofructokinase, platelet	0.0109515	0	upregulated	upregulated
201041_s_at	5q34	DUSP1	dual specificity phosphatase 1	5.36857e-07	upregulated	upregulated	downregulated
201042_at	20q12	TGM2	transglutaminase 2 (C polypeptide, protein-glutamine-gamma-glutamyltransferase)	0.000756411	0	upregulated	upregulated
201058_s_at	20q11.23	MYL9	myosin, light chain 9, regulatory	0.0222763	0	0	upregulated
201108_s_at	15q15	THBS1	thrombospondin 1	0.00451499	0	upregulated	upregulated
201109_s_at	15q15	THBS1	thrombospondin 1	4.98911e-05	0	upregulated	upregulated
201110_s_at	15q15	THBS1	thrombospondin 1	7.0679e-05	0	upregulated	upregulated
201124_at	3q21.2	ITGB5	integrin, beta 5	0.0249865	0	0	upregulated
201129_at	2p22.1	SFRS7	splicing factor, arginine/serine-rich 7, 35kDa	0.0269959	0	0	upregulated
201147_s_at	22q12.1-q13.2	TIMP3	TIMP metallopeptidase inhibitor 3	0.0315906	0	upregulated	upregulated
201149_s_at	22q12.1-q13.2	TIMP3	TIMP metallopeptidase inhibitor 3	0.0277296	0	0	upregulated
201150_s_at	22q12.1-q13.2	TIMP3	TIMP metallopeptidase inhibitor 3	0.000974447	0	upregulated	upregulated
201169_s_at	3p26	BHLHE40	basic helix-loop-helix family, member e40	0.00292625	0	upregulated	0
201170_s_at	3p26	BHLHE40	basic helix-loop-helix family, member e40	0.000216324	0	upregulated	0
201193_at	2q33.3	IDH1	isocitrate dehydrogenase 1 (NADP+), soluble	0.00722799	0	downregulated	downregulated
201195_s_at	16q24.3	SLC7A5	solute carrier family 7 (cationic amino acid transporter, y+ system), member 5	0.000137537	0	upregulated	upregulated
201279_s_at	5p13	DAB2	disabled homolog 2, mitogen-responsive phosphoprotein (Drosophila)	0.0383014	0	upregulated	0
201289_at	1p31-p22	CYR61	cysteine-rich, angiogenic inducer, 61	3.2249e-06	0	0	downregulated
201309_x_at	5q22.1	C5orf13	chromosome 5 open reading frame 13	0.024778	0	0	upregulated
201310_s_at	5q22.1	C5orf13	chromosome 5 open reading frame 13	0.000328844	0	upregulated	upregulated
201323_at	1p35-p33	EBNA1BP2	EBNA1 binding protein 2	0.00359748	0	0	upregulated
201328_at	21q22.2	ETS2	v-ets erythroblastosis virus E26 oncogene homolog 2 (avian)	0.000776094	0	upregulated	0
201329_s_at	21q22.2	ETS2	v-ets erythroblastosis virus E26 oncogene homolog 2 (avian)	0.0241914	0	upregulated	0
201341_at	5q12-q13.3	ENC1	ectodermal-neural cortex (with BTB-like domain)	0.000253451	0	upregulated	downregulated
201417_at	6p22.3	SOX4	SRY (sex determining region Y)-box 4	1.96037e-06	0	upregulated	upregulated
201464_x_at	1p32-p31	JUN	jun oncogene	0.00117889	0	0	downregulated
201466_s_at	1p32-p31	JUN	jun oncogene	0.000267608	0	0	downregulated
201475_x_at	12q13.2	MARS	methionyl-tRNA synthetase	0.0402635	0	0	upregulated
201478_s_at	Xq28	DKC1	dyskeratosis congenita 1, dyskerin	0.00100127	0	upregulated	upregulated
201479_at	Xq28	DKC1	dyskeratosis congenita 1, dyskerin	0.00184272	0	upregulated	upregulated
201502_s_at	14q13	NFKBIA	nuclear factor of kappa light polypeptide gene enhancer in B-cells inhibitor, alpha	0.0297193	0	0	0
201537_s_at	17q21	DUSP3	dual specificity phosphatase 3	0.000913034	0	upregulated	upregulated
201538_s_at	17q21	DUSP3	dual specificity phosphatase 3	0.0205885	0	upregulated	upregulated
201540_at	Xq26	FHL1	four and a half LIM domains 1	0.00720834	0	0	upregulated
201565_s_at	2p25	ID2	inhibitor of DNA binding 2, dominant negative helix-loop-helix protein	6.26141e-06	0	upregulated	0
201566_x_at	2p25	ID2	inhibitor of DNA binding 2, dominant negative helix-loop-helix protein	1.62528e-06	0	upregulated	0
201578_at	7q32-q33	PODXL	podocalyxin-like	0.0307441	0	upregulated	upregulated
201586_s_at	1p34.3	SFPQ	splicing factor proline/glutamine-rich (polypyrimidine tract binding protein associated)	0.00612331	0	upregulated	upregulated
201596_x_at	12q13	KRT18	keratin 18	2.64167e-05	0	upregulated	upregulated
201626_at	7q36	INSIG1	insulin induced gene 1	0.000343618	0	0	upregulated
201627_s_at	7q36	INSIG1	insulin induced gene 1	0.000235627	0	0	upregulated
201631_s_at	6p21.3	IER3	immediate early response 3	8.31118e-06	0	0	downregulated
201693_s_at	5q31.1	EGR1	early growth response 1	0.0107529	0	downregulated	downregulated
201694_s_at	5q31.1	EGR1	early growth response 1	0.00935558	0	downregulated	downregulated
201739_at	6q23	SGK1	serum/glucocorticoid regulated kinase 1	1.14656e-06	upregulated	upregulated	downregulated
201843_s_at	2p16	EFEMP1	EGF-containing fibulin-like extracellular matrix protein 1	0.00163791	0	0	upregulated
201848_s_at	10q26.3	BNIP3	BCL2/adenovirus E1B 19kDa interacting protein 3	0.0320699	0	0	downregulated
201896_s_at	1p13.3	PSRC1	proline/serine-rich coiled-coil 1	0.00353993	0	downregulated	0
201925_s_at	1q32	CD55	CD55 molecule, decay accelerating factor for complement (Cromer blood group)	0.00187582	0	upregulated	upregulated
201939_at	5q12.1-q13.2	PLK2	polo-like kinase 2 (Drosophila)	1.3717e-07	0	downregulated	downregulated
201957_at	1q32.1	PPP1R12B	protein phosphatase 1, regulatory (inhibitor) subunit 12B	0.00909824	0	upregulated	0
201981_at	9q33.2	PAPPA	pregnancy-associated plasma protein A, pappalysin 1	0.0229364	0	upregulated	upregulated
201983_s_at	7p12	EGFR	epidermal growth factor receptor (erythroblastic leukemia viral (v-erb-b) oncogene homolog, avian)	0.0497408	0	0	upregulated
201995_at	8q24.11-q24.13	EXT1	exostoses (multiple) 1	0.000249262	0	upregulated	upregulated
202003_s_at	18q21.1	ACAA2	acetyl-Coenzyme A acyltransferase 2	0.000298571	0	0	upregulated
202049_s_at	1p32-p34	ZMYM4	zinc finger, MYM-type 4	0.0358653	0	downregulated	0
202071_at	20q12	SDC4	syndecan 4	0.00121239	0	upregulated	upregulated
202081_at	19p13.13	IER2	immediate early response 2	0.0020426	0	downregulated	downregulated
202083_s_at	17q25.1-q25.2	SEC14L1	SEC14-like 1 (S. cerevisiae)	0.014954	0	upregulated	upregulated
202138_x_at	7p22	JTV1	JTV1 gene	0.00961114	0	0	upregulated
202147_s_at	7q22-q31	IFRD1	interferon-related developmental regulator 1	0.00548359	0	upregulated	upregulated
202177_at	13q34	GAS6	growth arrest-specific 6	0.011181	0	0	upregulated
202227_s_at	5q31	BRD8	bromodomain containing 8	0.00190965	0	downregulated	0
202237_at	11q23.1	NNMT	nicotinamide N-methyltransferase	0.00455863	0	upregulated	upregulated
202238_s_at	11q23.1	NNMT	nicotinamide N-methyltransferase	0.00556088	0	upregulated	upregulated
202241_at	8q24.13	TRIB1	tribbles homolog 1 (Drosophila)	2.31878e-05	0	0	downregulated
202340_x_at	12q13	NR4A1	nuclear receptor subfamily 4, group A, member 1	8.85513e-05	upregulated	upregulated	downregulated
202388_at	1q31	RGS2	regulator of G-protein signaling 2, 24kDa	6.32695e-05	upregulated	downregulated	downregulated
202392_s_at	22q12.2	PISD	phosphatidylserine decarboxylase	0.00617658	0	upregulated	upregulated
202393_s_at	8q22.2	KLF10	Kruppel-like factor 10	0.00135795	upregulated	upregulated	0
202401_s_at	6p21.1	SRF	serum response factor (c-fos serum response element-binding transcription factor)	0.000137357	0	upregulated	downregulated
202431_s_at	8q24.21	MYC	v-myc myelocytomatosis viral oncogene homolog (avian)	8.89064e-05	upregulated	upregulated	downregulated
202437_s_at	2p21	CYP1B1	cytochrome P450, family 1, subfamily B, polypeptide 1	0.00927645	0	0	upregulated
202464_s_at	10p14-p15	PFKFB3	6-phosphofructo-2-kinase/fructose-2,6-biphosphatase 3	0.00249816	0	upregulated	0
202478_at	2p25.1-p24.3	TRIB2	tribbles homolog 2 (Drosophila)	0.00190965	0	upregulated	0
202481_at	1p36.1	DHRS3	dehydrogenase/reductase (SDR family) member 3	1.3717e-07	0	0	downregulated
202540_s_at	5q13.3-q14	HMGCR	3-hydroxy-3-methylglutaryl-Coenzyme A reductase	0.00030461	0	0	upregulated
202551_s_at	2p21	CRIM1	cysteine rich transmembrane BMP regulator 1 (chordin-like)	8.08807e-05	0	upregulated	upregulated
202552_s_at	2p21	CRIM1	cysteine rich transmembrane BMP regulator 1 (chordin-like)	0.00317866	0	upregulated	upregulated
202584_at	9p13.3	NFX1	nuclear transcription factor, X-box binding 1	0.023771	0	0	upregulated
202585_s_at	9p13.3	NFX1	nuclear transcription factor, X-box binding 1	0.00203937	0	0	upregulated
202607_at	5q33.1	NDST1	N-deacetylase/N-sulfotransferase (heparan glucosaminyl) 1	0.0150649	0	upregulated	upregulated
202613_at	1p34.1	CTPS	CTP synthase	0.00269443	0	upregulated	upregulated
202627_s_at	7q21.3-q22	SERPINE1	serpin peptidase inhibitor, clade E (nexin, plasminogen activator inhibitor type 1), member 1	0.00010557	0	upregulated	upregulated
202628_s_at	7q21.3-q22	SERPINE1	serpin peptidase inhibitor, clade E (nexin, plasminogen activator inhibitor type 1), member 1	0.000117508	0	upregulated	upregulated
202644_s_at	6q23	TNFAIP3	tumor necrosis factor, alpha-induced protein 3	0.0406797	0	upregulated	0
202668_at	13q33	EFNB2	ephrin-B2	0.00223067	0	upregulated	0
202669_s_at	13q33	EFNB2	ephrin-B2	0.0167356	0	upregulated	0
202672_s_at	1q32.3	ATF3	activating transcription factor 3	2.21466e-05	0	0	downregulated
202679_at	18q11-q12	NPC1	Niemann-Pick disease, type C1	0.0301093	0	upregulated	0
202687_s_at	3q26	TNFSF10	tumor necrosis factor (ligand) superfamily, member 10	0.0125305	0	0	downregulated
202688_at	3q26	TNFSF10	tumor necrosis factor (ligand) superfamily, member 10	0.00060177	0	downregulated	downregulated
202708_s_at	1q21-q23	HIST2H2BE	histone cluster 2, H2be	0.0108428	0	0	upregulated
202743_at	1p34.1	PIK3R3	phosphoinositide-3-kinase, regulatory subunit 3 (gamma)	0.00190965	0	downregulated	upregulated
202744_at	8p12-p11	SLC20A2	solute carrier family 20 (phosphate transporter), member 2	0.00111618	0	upregulated	upregulated
202759_s_at	9q31-q33	AKAP2	A kinase (PRKA) anchor protein 2	0.0139771	0	upregulated	upregulated
202760_s_at	9q31-q33	PALM2-AKAP2	PALM2-AKAP2 readthrough transcript	0.012184	0	upregulated	upregulated
202768_at	19q13.32	FOSB	FBJ murine osteosarcoma viral oncogene homolog B	0.000233629	0	0	downregulated
202769_at	4q21.1	CCNG2	cyclin G2	0.000203642	0	downregulated	0
202770_s_at	4q21.1	CCNG2	cyclin G2	0.000108382	0	downregulated	0
202771_at	16q24.3	FAM38A	family with sequence similarity 38, member A	0.0356316	0	upregulated	upregulated
202814_s_at	17q21.31	HEXIM1	hexamethylene bis-acetamide inducible 1	0.0194077	0	downregulated	0
202820_at	7p15	AHR	aryl hydrocarbon receptor	0.00950985	0	upregulated	downregulated
202847_at	14q12	PCK2	phosphoenolpyruvate carboxykinase 2 (mitochondrial)	0.000107756	0	0	upregulated
202859_x_at	4q13-q21	IL8	interleukin 8	3.85248e-07	0	0	downregulated
202861_at	17p13.1-p12	PER1	period homolog 1 (Drosophila)	0.0201938	0	upregulated	0
202887_s_at	10pter-q26.12	DDIT4	DNA-damage-inducible transcript 4	1.62762e-06	0	upregulated	upregulated
202912_at	11p15.4	ADM	adrenomedullin	6.26191e-06	0	upregulated	downregulated
202934_at	2p13	HK2	hexokinase 2	0.000577485	0	upregulated	0
202935_s_at	17q24.3-q25.1	SOX9	SRY (sex determining region Y)-box 9	0.00685814	upregulated	upregulated	0
202936_s_at	17q24.3-q25.1	SOX9	SRY (sex determining region Y)-box 9	0.0132346	0	upregulated	downregulated
202949_s_at	2q12-q14	FHL2	four and a half LIM domains 2	0.000247339	0	upregulated	upregulated
202952_s_at	10q26.3	ADAM12	ADAM metallopeptidase domain 12	0.00377909	0	0	upregulated
202972_s_at	4q22.1	FAM13A	family with sequence similarity 13, member A	0.0112429	0	downregulated	downregulated
202973_x_at	4q22.1	FAM13A	family with sequence similarity 13, member A	0.00156647	0	downregulated	downregulated
203023_at	5q35.2	NOP16	NOP16 nucleolar protein homolog (yeast)	0.00296755	0	0	upregulated
203072_at	15q21-q22	MYO1E	myosin IE	0.000345305	0	upregulated	upregulated
203083_at	6q27	THBS2	thrombospondin 2	0.00769957	0	upregulated	0
203108_at	12p13-p12.3	GPRC5A	G protein-coupled receptor, family C, group 5, member A	0.000130638	0	upregulated	upregulated
203119_at	11q12.2	CCDC86	coiled-coil domain containing 86	0.00146167	0	upregulated	upregulated
203153_at	10q25-q26	IFIT1	interferon-induced protein with tetratricopeptide repeats 1	0.00420075	0	downregulated	downregulated
203201_at	16p13.3-p13.2	PMM2	phosphomannomutase 2	0.000660821	0	upregulated	upregulated
203221_at	9q21.32	TLE1	transducin-like enhancer of split 1 (E(sp1) homolog, Drosophila)	0.0345255	0	0	upregulated
203222_s_at	9q21.32	TLE1	transducin-like enhancer of split 1 (E(sp1) homolog, Drosophila)	0.039469	0	0	upregulated
203229_s_at	1q21	CLK2	CDC-like kinase 2	0.00188446	0	0	upregulated
203234_at	7p12.3	UPP1	uridine phosphorylase 1	0.0196869	0	0	upregulated
203242_s_at	4q22	PDLIM5	PDZ and LIM domain 5	0.00156647	0	upregulated	upregulated
203243_s_at	4q22	PDLIM5	PDZ and LIM domain 5	0.000697978	0	upregulated	upregulated
203274_at	Xq28	F8A1	coagulation factor VIII-associated (intronic transcript) 1	0.0209246	0	0	upregulated
203278_s_at	11p11.2	PHF21A	PHD finger protein 21A	0.0238893	0	0	downregulated
203297_s_at	6p24-p23	JARID2	jumonji, AT rich interactive domain 2	0.00060177	0	upregulated	0
203298_s_at	6p24-p23	JARID2	jumonji, AT rich interactive domain 2	9.52301e-06	0	upregulated	0
203313_s_at	18p11.3	TGIF1	TGFB-induced factor homeobox 1	0.000734344	0	upregulated	upregulated
203340_s_at	2q24	SLC25A12	solute carrier family 25 (mitochondrial carrier, Aralar), member 12	0.0275917	0	0	downregulated
203367_at	17q12	DUSP14	dual specificity phosphatase 14	0.00783295	0	upregulated	0
203373_at	12q	SOCS2	suppressor of cytokine signaling 2	0.0022137	0	upregulated	upregulated
203394_s_at	3q28-q29	HES1	hairy and enhancer of split 1, (Drosophila)	4.51043e-05	0	upregulated	0
203395_s_at	3q28-q29	HES1	hairy and enhancer of split 1, (Drosophila)	8.99213e-05	0	upregulated	0
203438_at	5q35.2	STC2	stanniocalcin 2	2.13873e-05	0	upregulated	upregulated
203439_s_at	5q35.2	STC2	stanniocalcin 2	2.67851e-05	0	upregulated	upregulated
203440_at	18q11.2	CDH2	cadherin 2, type 1, N-cadherin (neuronal)	0.0432655	0	0	upregulated
203441_s_at	18q11.2	CDH2	cadherin 2, type 1, N-cadherin (neuronal)	0.00818033	0	0	upregulated
203499_at	1p36	EPHA2	EPH receptor A2	0.0034293	0	upregulated	downregulated
203502_at	7q31-q34	BPGM	2,3-bisphosphoglycerate mutase	0.010538	0	downregulated	downregulated
203504_s_at	9q31.1	ABCA1	ATP-binding cassette, sub-family A (ABC1), member 1	0.000445779	0	0	downregulated
203505_at	9q31.1	ABCA1	ATP-binding cassette, sub-family A (ABC1), member 1	0.00213632	0	0	downregulated
203542_s_at	9q13	KLF9	Kruppel-like factor 9	3.2249e-06	0	upregulated	downregulated
203543_s_at	9q13	KLF9	Kruppel-like factor 9	4.02863e-06	0	upregulated	downregulated
203574_at	9q22	NFIL3	nuclear factor, interleukin 3 regulated	0.000868278	upregulated	upregulated	upregulated
203578_s_at	16q22.1	SLC7A6	solute carrier family 7 (cationic amino acid transporter, y+ system), member 6	0.00183555	0	upregulated	upregulated
203579_s_at	16q22.1	SLC7A6	solute carrier family 7 (cationic amino acid transporter, y+ system), member 6	0.000995536	0	upregulated	upregulated
203592_s_at	19p13	FSTL3	follistatin-like 3 (secreted glycoprotein)	0.0051619	0	upregulated	upregulated
203612_at	6p21.1	BYSL	bystin-like	0.00123804	0	upregulated	upregulated
203622_s_at	2p14	PNO1	partner of NOB1 homolog (S. cerevisiae)	0.00601065	0	0	upregulated
203627_at	15q26.3	IGF1R	insulin-like growth factor 1 receptor	0.000148951	0	upregulated	upregulated
203628_at	15q26.3	IGF1R	insulin-like growth factor 1 receptor	0.0321971	0	0	upregulated
203632_s_at	16p12	GPRC5B	G protein-coupled receptor, family C, group 5, member B	0.00320657	0	upregulated	0
203633_at	11q13.1-q13.2	CPT1A	carnitine palmitoyltransferase 1A (liver)	0.000229905	0	0	upregulated
203658_at	3p21.31	SLC25A20	solute carrier family 25 (carnitine/acylcarnitine translocase), member 20	0.00114871	0	0	upregulated
203665_at	22q12	HMOX1	heme oxygenase (decycling) 1	0.0036504	0	upregulated	upregulated
203666_at	10q11.1	CXCL12	chemokine (C-X-C motif) ligand 12 (stromal cell-derived factor 1)	0.0327821	0	0	upregulated
203705_s_at	2q33	FZD7	frizzled homolog 7 (Drosophila)	0.00359748	0	upregulated	0
203706_s_at	2q33	FZD7	frizzled homolog 7 (Drosophila)	0.0229329	0	upregulated	0
203708_at	1p31	PDE4B	phosphodiesterase 4B, cAMP-specific (phosphodiesterase E4 dunce homolog, Drosophila)	0.00193104	0	0	upregulated
203725_at	1p31.2-p31.1	GADD45A	growth arrest and DNA-damage-inducible, alpha	4.07544e-06	0	0	downregulated
203766_s_at	1q32	LMOD1	leiomodin 1 (smooth muscle)	0.0032283	0	upregulated	0
203817_at	4q31.3-q33	GUCY1B3	guanylate cyclase 1, soluble, beta 3	0.0124729	0	0	downregulated
203821_at	5q23	HBEGF	heparin-binding EGF-like growth factor	1.33257e-05	0	upregulated	downregulated
203837_at	6q22.33	MAP3K5	mitogen-activated protein kinase kinase kinase 5	0.0286693	0	0	downregulated
203865_s_at	21q22.3	ADARB1	adenosine deaminase, RNA-specific, B1 (RED1 homolog rat)	0.0265658	0	0	upregulated
203868_s_at	1p32-p31	VCAM1	vascular cell adhesion molecule 1	0.0234878	0	upregulated	0
203882_at	14q11.2	IRF9	interferon regulatory factor 9	0.000342717	0	downregulated	downregulated
203916_at	10q22	NDST2	N-deacetylase/N-sulfotransferase (heparan glucosaminyl) 2	0.0360345	0	0	upregulated
203925_at	1p22.1	GCLM	glutamate-cysteine ligase, modifier subunit	0.00849821	0	upregulated	0
203973_s_at	8p11.2-p11.1	CEBPD	CCAAT/enhancer binding protein (C/EBP), delta	2.40293e-05	0	upregulated	0
203991_s_at	Xp11.2	UTX	ubiquitously transcribed tetratricopeptide repeat, X chromosome	0.0387719	0	0	upregulated
203999_at	12cen-q21	SYT1	synaptotagmin I	0.0140266	0	0	downregulated
204005_s_at	12q21	PAWR	PRKC, apoptosis, WT1, regulator	0.00188841	0	upregulated	upregulated
204011_at	13q31.1	SPRY2	sprouty homolog 2 (Drosophila)	0.00161163	0	0	downregulated
204027_s_at	12q13	METTL1	methyltransferase like 1	0.00247977	0	upregulated	upregulated
204030_s_at	3q25.33	SCHIP1	schwannomin interacting protein 1	0.000140965	0	upregulated	0
204032_at	1p22.1	BCAR3	breast cancer anti-estrogen resistance 3	0.000769078	0	upregulated	0
204094_s_at	3q25.1	TSC22D2	TSC22 domain family, member 2	0.00909824	0	upregulated	0
204135_at	3q12.1	FILIP1L	filamin A interacting protein 1-like	0.00980404	0	0	downregulated
204199_at	9q33.3	RALGPS1	Ral GEF with PH domain and SH3 binding motif 1	0.00032648	0	0	downregulated
204203_at	19q13.11	CEBPG	CCAAT/enhancer binding protein (C/EBP), gamma	0.00202826	0	upregulated	upregulated
204214_s_at	6q24.3	RAB32	RAB32, member RAS oncogene family	0.00982163	0	upregulated	upregulated
204222_s_at	12q21.2	GLIPR1	GLI pathogenesis-related 1	9.13997e-05	0	upregulated	upregulated
204256_at	4q25	ELOVL6	ELOVL family member 6, elongation of long chain fatty acids (FEN1/Elo2, SUR4/Elo3-like, yeast)	0.0112204	0	0	downregulated
204284_at	10q23-q24	PPP1R3C	protein phosphatase 1, regulatory (inhibitor) subunit 3C	0.00119271	0	0	downregulated
204308_s_at	14q32.31	TECPR2	tectonin beta-propeller repeat containing 2	0.00420075	0	0	upregulated
204326_x_at	16q13	MT1X	metallothionein 1X	2.44401e-06	0	upregulated	upregulated
204334_at	2q32	KLF7	Kruppel-like factor 7 (ubiquitous)	0.000432265	0	0	downregulated
204337_at	1q23.3	RGS4	regulator of G-protein signaling 4	5.76144e-07	0	0	downregulated
204339_s_at	1q23.3	RGS4	regulator of G-protein signaling 4	2.27962e-05	0	0	downregulated
204349_at	5q33.3	MED7	mediator complex subunit 7	0.0423351	0	downregulated	0
204363_at	1p22-p21	F3	coagulation factor III (thromboplastin, tissue factor)	4.79148e-06	0	upregulated	downregulated
204368_at	3q21	SLCO2A1	solute carrier organic anion transporter family, member 2A1	0.00909824	0	upregulated	upregulated
204421_s_at	4q26-q27	FGF2	fibroblast growth factor 2 (basic)	0.000120417	0	upregulated	upregulated
204457_s_at	9q21.3-q22	GAS1	growth arrest-specific 1	0.00295616	0	upregulated	upregulated
204472_at	8q13-q21	GEM	GTP binding protein overexpressed in skeletal muscle	0.000125754	0	upregulated	0
204491_at	5q12	PDE4D	phosphodiesterase 4D, cAMP-specific (phosphodiesterase E3 dunce homolog, Drosophila)	0.0452731	0	upregulated	0
204512_at	6p24-p22.3	HIVEP1	human immunodeficiency virus type I enhancer binding protein 1	0.0279807	0	upregulated	0
204514_at	1p34	DPH2	DPH2 homolog (S. cerevisiae)	0.00907119	0	upregulated	upregulated
204526_s_at	2q11.2	TBC1D8	TBC1 domain family, member 8 (with GRAM domain)	0.00408696	0	downregulated	downregulated
204529_s_at	8q12.1	TOX	thymocyte selection-associated high mobility group box	0.000803193	0	0	upregulated
204537_s_at	Xq28	GABRE	gamma-aminobutyric acid (GABA) A receptor, epsilon	0.0461245	0	0	upregulated
204554_at	20q13.3	PPP1R3D	protein phosphatase 1, regulatory (inhibitor) subunit 3D	0.0108984	0	0	upregulated
204589_at	12q23.3	NUAK1	NUAK family, SNF1-like kinase, 1	0.000287666	0	upregulated	upregulated
204595_s_at	8p21-p11.2	STC1	stanniocalcin 1	3.31234e-05	0	upregulated	0
204597_x_at	8p21-p11.2	STC1	stanniocalcin 1	0.000501381	0	upregulated	0
204602_at	10q11.2	DKK1	dickkopf homolog 1 (Xenopus laevis)	3.85248e-07	0	upregulated	upregulated
204612_at	8q21.12	PKIA	protein kinase (cAMP-dependent, catalytic) inhibitor alpha	0.00501755	0	0	downregulated
204614_at	18q21.3	SERPINB2	serpin peptidase inhibitor, clade B (ovalbumin), member 2	0.000286721	0	upregulated	upregulated
204622_x_at	2q22-q23	NR4A2	nuclear receptor subfamily 4, group A, member 2	0.0013714	upregulated	upregulated	0
204642_at	1p21	S1PR1	sphingosine-1-phosphate receptor 1	0.00139215	0	upregulated	0
204653_at	6p24	TFAP2A	transcription factor AP-2 alpha (activating enhancer binding protein 2 alpha)	0.0125051	0	upregulated	0
204681_s_at	7p15.3	RAPGEF5	Rap guanine nucleotide exchange factor (GEF) 5	0.0313953	0	downregulated	0
204686_at	2q36	IRS1	insulin receptor substrate 1	0.00311457	0	upregulated	0
204700_x_at	1q32.2	C1orf107	chromosome 1 open reading frame 107	0.0021063	0	upregulated	upregulated
204745_x_at	16q13	MT1G	metallothionein 1G	0.000231617	0	upregulated	upregulated
204790_at	18q21.1	SMAD7	SMAD family member 7	2.00375e-05	0	upregulated	upregulated
204820_s_at	6p21.3	BTN3A3	butyrophilin, subfamily 3, member A3	0.025599	0	0	downregulated
204821_at	6p21.3	BTN3A3	butyrophilin, subfamily 3, member A3	0.00497094	0	0	downregulated
204823_at	12q14.3	NAV3	neuron navigator 3	0.00522636	0	upregulated	0
204826_at	16p13.3	CCNF	cyclin F	0.0445297	0	downregulated	0
204830_x_at	19q13.2	PSG5	pregnancy specific beta-1-glycoprotein 5	0.000541131	0	0	upregulated
204838_s_at	14q24.3	MLH3	mutL homolog 3 (E. coli)	0.0147415	0	downregulated	0
204872_at	9q21.31	TLE4	transducin-like enhancer of split 4 (E(sp1) homolog, Drosophila)	0.00938517	0	upregulated	upregulated
204897_at	5p13.1	PTGER4	prostaglandin E receptor 4 (subtype EP4)	2.18132e-05	0	downregulated	downregulated
204916_at	2q36-q37.1	RAMP1	receptor (G protein-coupled) activity modifying protein 1	0.00192716	0	upregulated	upregulated
204931_at	6pter-qter	TCF21	transcription factor 21	0.000830595	0	upregulated	upregulated
204933_s_at	8q24	TNFRSF11B	tumor necrosis factor receptor superfamily, member 11b	0.00978862	0	0	upregulated
204948_s_at	5q11.2	FST	follistatin	1.93143e-06	0	upregulated	upregulated
204950_at	19q13.32	CARD8	caspase recruitment domain family, member 8	0.0161512	0	downregulated	0
204967_at	Xp22.3	SHROOM2	shroom family member 2	0.00440313	0	upregulated	0
204991_s_at	22q12.2	NF2	neurofibromin 2 (merlin)	0.02657	0	0	upregulated
205020_s_at	7p21-p15.3	ARL4A	ADP-ribosylation factor-like 4A	0.0061032	0	0	downregulated
205047_s_at	7q21.3	ASNS	asparagine synthetase	9.52301e-06	0	0	upregulated
205080_at	3p24	RARB	retinoic acid receptor, beta	5.7895e-06	0	0	downregulated
205107_s_at	1q21-q22	EFNA4	ephrin-A4	0.000614006	0	downregulated	0
205117_at	5q31	FGF1	fibroblast growth factor 1 (acidic)	4.1021e-06	0	upregulated	upregulated
205160_at	15q26.1	PEX11A	peroxisomal biogenesis factor 11 alpha	0.00117083	0	downregulated	downregulated
205167_s_at	5q31	CDC25C	cell division cycle 25 homolog C (S. pombe)	0.00737734	0	0	downregulated
205193_at	22q13.1	MAFF	v-maf musculoaponeurotic fibrosarcoma oncogene homolog F (avian)	0.00021673	0	0	downregulated
205207_at	7p21	IL6	interleukin 6 (interferon, beta 2)	3.11878e-07	upregulated	upregulated	downregulated
205225_at	6q25.1	ESR1	estrogen receptor 1	0.00116458	0	downregulated	upregulated
205239_at	4q13-q21	AREG	amphiregulin	0.000106858	0	upregulated	0
205240_at	1p13.3	GPSM2	G-protein signaling modulator 2 (AGS3-like, C. elegans)	0.00671313	0	downregulated	downregulated
205249_at	10q21.1	EGR2	early growth response 2 (Krox-20 homolog, Drosophila)	1.05571e-06	0	downregulated	downregulated
205251_at	2q37.3	PER2	period homolog 2 (Drosophila)	0.00789614	0	upregulated	upregulated
205260_s_at	14q24.3	ACYP1	acylphosphatase 1, erythrocyte (common) type	0.0361265	0	0	downregulated
205263_at	1p22	BCL10	B-cell CLL/lymphoma 10	0.00109646	0	0	downregulated
205264_at	19q13.3	CD3EAP	CD3e molecule, epsilon associated protein	0.00157072	0	upregulated	upregulated
205266_at	22q12.2	LIF	leukemia inhibitory factor (cholinergic differentiation factor)	2.82657e-05	upregulated	upregulated	0
205280_at	4q31.3	GLRB	glycine receptor, beta	0.0139771	0	0	downregulated
205282_at	1p34	LRP8	low density lipoprotein receptor-related protein 8, apolipoprotein e receptor	0.0117153	0	0	upregulated
205284_at	1q42.13	URB2	URB2 ribosome biogenesis 2 homolog (S. cerevisiae)	0.00552636	0	upregulated	0
205294_at	17q25	BAIAP2	BAI1-associated protein 2	0.0116747	0	upregulated	0
205357_s_at	3q21-q25	AGTR1	angiotensin II receptor, type 1	0.000770329	0	upregulated	upregulated
205398_s_at	15q22.33	SMAD3	SMAD family member 3	0.00104434	0	upregulated	0
205479_s_at	10q24	PLAU	plasminogen activator, urokinase	0.0230313	0	upregulated	0
205532_s_at	5p15.1-p14	CDH6	cadherin 6, type 2, K-cadherin (fetal kidney)	0.000162659	0	0	upregulated
205534_at	4p15	PCDH7	protocadherin 7	2.31878e-05	0	upregulated	upregulated
205535_s_at	4p15	PCDH7	protocadherin 7	0.000120417	0	upregulated	upregulated
205547_s_at	11q23.2	TAGLN	transgelin	0.000143472	0	upregulated	upregulated
205566_at	15q26.1	ABHD2	abhydrolase domain containing 2	0.0186372	0	upregulated	upregulated
205704_s_at	12q24.31	ATP6V0A2	ATPase, H+ transporting, lysosomal V0 subunit a2	0.00535914	0	upregulated	upregulated
205798_at	5p13	IL7R	interleukin 7 receptor	0.000342717	0	upregulated	upregulated
205807_s_at	1q21	TUFT1	tuftelin 1	6.16662e-05	0	upregulated	0
205825_at	5q15-q21	PCSK1	proprotein convertase subtilisin/kexin type 1	0.0024288	0	0	upregulated
205832_at	7q32	CPA4	carboxypeptidase A4	0.00301595	0	upregulated	upregulated
205895_s_at	10q24.32	NOLC1	nucleolar and coiled-body phosphoprotein 1	0.0146644	0	upregulated	upregulated
205896_at	5q31.1	SLC22A4	solute carrier family 22 (organic cation/ergothioneine transporter), member 4	0.0453207	0	0	upregulated
205931_s_at	7p15.1	CREB5	cAMP responsive element binding protein 5	0.00183147	0	upregulated	upregulated
205935_at	16q24	FOXF1	forkhead box F1	0.002333	0	upregulated	upregulated
205990_s_at	3p21-p14	WNT5A	wingless-type MMTV integration site family, member 5A	0.00392388	0	upregulated	upregulated
206034_at	18q21.3	SERPINB8	serpin peptidase inhibitor, clade B (ovalbumin), member 8	0.00883262	0	upregulated	upregulated
206053_at	9q22.33	ZNF510	zinc finger protein 510	0.0452731	0	downregulated	0
206115_at	8p23-p21	EGR3	early growth response 3	8.22996e-06	0	downregulated	downregulated
206116_s_at	15q22.1	TPM1	tropomyosin 1 (alpha)	0.000264651	0	upregulated	upregulated
206117_at	15q22.1	TPM1	tropomyosin 1 (alpha)	0.00283118	0	0	upregulated
206157_at	3q25	PTX3	pentraxin-related gene, rapidly induced by IL-1 beta	0.0039839	0	upregulated	upregulated
206254_at	4q25	EGF	epidermal growth factor (beta-urogastrone)	3.03779e-05	downregulated	upregulated	downregulated
206295_at	11q22.2-q22.3	IL18	interleukin 18 (interferon-gamma-inducing factor)	0.0313953	0	upregulated	0
206314_at	3p22.3-p21.1	ZNF167	zinc finger protein 167	0.000522724	0	downregulated	upregulated
206343_s_at	8p12	NRG1	neuregulin 1	1.29171e-05	0	upregulated	upregulated
206359_at	17q25.3	SOCS3	suppressor of cytokine signaling 3	0.00033615	0	upregulated	upregulated
206376_at	12q21.3	SLC6A15	solute carrier family 6 (neutral amino acid transporter), member 15	0.00203981	0	0	upregulated
206382_s_at	11p13	BDNF	brain-derived neurotrophic factor	7.60246e-06	0	0	downregulated
206448_at	10q21.2	ZNF365	zinc finger protein 365	0.0022137	0	upregulated	upregulated
206461_x_at	16q13	MT1H	metallothionein 1H	5.18269e-05	0	upregulated	upregulated
206481_s_at	4p16	LDB2	LIM domain binding 2	0.00326275	0	0	downregulated
206504_at	20q13	CYP24A1	cytochrome P450, family 24, subfamily A, polypeptide 1	6.61339e-05	0	upregulated	upregulated
206510_at	2p16-p15	SIX2	SIX homeobox 2	0.0158451	0	upregulated	upregulated
206581_at	15q25.2	BNC1	basonuclin 1	0.00457975	0	upregulated	0
206631_at	14q22	PTGER2	prostaglandin E receptor 2 (subtype EP2), 53kDa	1.94461e-05	0	upregulated	upregulated
206814_at	1p13.1	NGF	nerve growth factor (beta polypeptide)	4.98911e-05	0	upregulated	upregulated
206924_at	19q13.3-q13.4	IL11	interleukin 11	6.84129e-07	0	upregulated	upregulated
206926_s_at	19q13.3-q13.4	IL11	interleukin 11	0.000143472	0	upregulated
207069_s_at	15q21-q22	SMAD6	SMAD family member 6	0.000769977	0	upregulated	upregulated
207332_s_at	3q29	TFRC	transferrin receptor (p90, CD71)	0.000311024	0	0	downregulated
207345_at	5q11.2	FST	follistatin	1.07073e-06	0	upregulated	upregulated
207391_s_at	1q22-q24	PIP5K1A	phosphatidylinositol-4-phosphate 5-kinase, type I, alpha	0.0156868	0	upregulated	0
207558_s_at	4q25-q27	PITX2	paired-like homeodomain 2	0.0263379	0	0	upregulated
207571_x_at	1p35.3	C1orf38	chromosome 1 open reading frame 38	0.00360249	0	downregulated	downregulated
207667_s_at	17q11.2	MAP2K3	mitogen-activated protein kinase kinase 3	0.00210804	0	upregulated	0
207761_s_at	12q13.13	METTL7A	methyltransferase like 7A	0.00181861	0	0	downregulated
207826_s_at	1p36.13-p36.12	ID3	inhibitor of DNA binding 3, dominant negative helix-loop-helix protein	5.72206e-07	0	upregulated	0
207978_s_at	9q22	NR4A3	nuclear receptor subfamily 4, group A, member 3	2.40293e-05	upregulated	upregulated	0
207980_s_at	6q23.3	CITED2	Cbp/p300-interacting transactivator, with Glu/Asp-rich carboxy-terminal domain, 2	1.96037e-06	0	0	downregulated
208078_s_at	10p11.2	ZEB1	zinc finger E-box binding homeobox 1	7.14354e-05	upregulated	upregulated	upregulated
208161_s_at	17q22	ABCC3	ATP-binding cassette, sub-family C (CFTR/MRP), member 3	0.0225098	0	0	upregulated
208178_x_at	5p15.2	TRIO	triple functional domain (PTPRF interacting)	0.00281546	0	upregulated	upregulated
208191_x_at	19q13.2	PSG4	pregnancy specific beta-1-glycoprotein 4	0.00140178	0	upregulated	upregulated
208257_x_at	19q13.2	PSG1	pregnancy specific beta-1-glycoprotein 1	0.00820569	0	0	upregulated
208581_x_at	16q13	MT1X	metallothionein 1X	9.35058e-06	0	upregulated	upregulated
208613_s_at	3p14.3	FLNB	filamin B, beta (actin binding protein 278)	0.0187787	0	upregulated	upregulated
208636_at	14q22-q24	ACTN1	actinin, alpha 1	0.0112145	0	upregulated	upregulated
208637_x_at	14q22-q24	ACTN1	actinin, alpha 1	0.00361875	0	upregulated	upregulated
208691_at	3q29	TFRC	transferrin receptor (p90, CD71)	0.000232096	0	0	downregulated
208707_at	14q32.32	EIF5	eukaryotic translation initiation factor 5	0.00159867	0	downregulated	downregulated
208712_at	11q13	CCND1	cyclin D1	0.0110802	0	upregulated	0
208763_s_at	Xq22.3	TSC22D3	TSC22 domain family, member 3	9.41868e-05	0	0	upregulated
208891_at	12q22-q23	DUSP6	dual specificity phosphatase 6	7.60086e-05	0	downregulated	downregulated
208892_s_at	12q22-q23	DUSP6	dual specificity phosphatase 6	6.45094e-05	0	downregulated	downregulated
208893_s_at	12q22-q23	DUSP6	dual specificity phosphatase 6	5.89652e-05	0	downregulated	downregulated
208937_s_at	20q11	ID1	inhibitor of DNA binding 1, dominant negative helix-loop-helix protein	5.76144e-07	0	upregulated	downregulated
208960_s_at	10p15	KLF6	Kruppel-like factor 6	0.000225457	0	0	downregulated
208961_s_at	10p15	KLF6	Kruppel-like factor 6	2.27962e-05	0	downregulated	downregulated
208998_at	11q13	UCP2	uncoupling protein 2 (mitochondrial, proton carrier)	0.000319309	0	0	upregulated
209006_s_at	1p36.13-p35.1	C1orf63	chromosome 1 open reading frame 63	0.0061032	0	0	upregulated
209007_s_at	1p36.13-p35.1	C1orf63	chromosome 1 open reading frame 63	0.000165081	0	downregulated	upregulated
209011_at	5p15.2	TRIO	triple functional domain (PTPRF interacting)	0.02763	0	0	upregulated
209013_x_at	5p15.2	TRIO	triple functional domain (PTPRF interacting)	0.00379223	0	0	upregulated
209037_s_at	11q13	EHD1	EH-domain containing 1	0.0165611	0	upregulated	0
209067_s_at	4q13-q21	HNRPDL	heterogeneous nuclear ribonucleoprotein D-like	0.00236767	0	0	upregulated
209098_s_at	20p12.1-p11.23	JAG1	jagged 1 (Alagille syndrome)	0.00195802	0	upregulated	0
209099_x_at	20p12.1-p11.23	JAG1	jagged 1 (Alagille syndrome)	0.00205889	0	upregulated	0
209101_at	6q23.1	CTGF	connective tissue growth factor	1.60735e-05	0	0	downregulated
209112_at	12p13.1-p12	CDKN1B	cyclin-dependent kinase inhibitor 1B (p27, Kip1)	0.0320543	0	0	upregulated
209119_x_at	15q26	NR2F2	nuclear receptor subfamily 2, group F, member 2	0.0108268	0	upregulated	0
209121_x_at	15q26	NR2F2	nuclear receptor subfamily 2, group F, member 2	0.0191868	0	upregulated	0
209122_at	9p22.1	ADFP	adipose differentiation-related protein	0.00021673	0	0	upregulated
209193_at	6p21.2	PIM1	pim-1 oncogene	0.00609602	0	upregulated	0
209209_s_at	14q22.2	FERMT2	fermitin family homolog 2 (Drosophila)	0.0417618	0	upregulated	0
209210_s_at	14q22.2	FERMT2	fermitin family homolog 2 (Drosophila)	0.021758	0	upregulated	0
209211_at	13q22.1	KLF5	Kruppel-like factor 5 (intestinal)	0.000324206	0	upregulated	0
209212_s_at	13q22.1	KLF5	Kruppel-like factor 5 (intestinal)	0.000233552	0	upregulated	0
209218_at	8q24.1	SQLE	squalene epoxidase	5.48551e-05	0	0	upregulated
209230_s_at	16p11.2	NUPR1	nuclear protein 1	9.18451e-05	0	0	upregulated
209286_at	2p21	CDC42EP3	CDC42 effector protein (Rho GTPase binding) 3	4.05503e-05	0	upregulated	downregulated
209287_s_at	2p21	CDC42EP3	CDC42 effector protein (Rho GTPase binding) 3	0.00315026	0	0	downregulated
209291_at	6p22-p21	ID4	inhibitor of DNA binding 4, dominant negative helix-loop-helix protein	1.3717e-07	0	upregulated	0
209317_at	6p21.1	POLR1C	polymerase (RNA) I polypeptide C, 30kDa	0.00892576	0	upregulated	upregulated
209336_at	21q22.3	PWP2	PWP2 periodic tryptophan protein homolog (yeast)	0.00271006	0	upregulated	upregulated
209355_s_at	1pter-p22.1	PPAP2B	phosphatidic acid phosphatase type 2B	0.000756411	0	upregulated	upregulated
209357_at	6q23.3	CITED2	Cbp/p300-interacting transactivator, with Glu/Asp-rich carboxy-terminal domain, 2	9.35388e-06	0	upregulated	downregulated
209360_s_at	21q22.3	RUNX1	runt-related transcription factor 1	0.0281695	0	upregulated	0
209373_at	2q13	MALL	mal, T-cell differentiation protein-like	0.0240308	0	upregulated	0
209383_at	12q13.1-q13.2	DDIT3	DNA-damage-inducible transcript 3	0.00151752	0	upregulated	upregulated
209386_at	3q21-q25	TM4SF1	transmembrane 4 L six family member 1	3.2249e-06	0	upregulated	upregulated
209387_s_at	3q21-q25	TM4SF1	transmembrane 4 L six family member 1	7.90799e-05	0	upregulated	upregulated
209409_at	7p12-p11.2	GRB10	growth factor receptor-bound protein 10	0.00296755	0	0	upregulated
209457_at	10q25	DUSP5	dual specificity phosphatase 5	7.01392e-06	0	downregulated	downregulated
209501_at	16p12.3	CDR2	cerebellar degeneration-related protein 2, 62kDa	0.00885399	0	upregulated	0
209536_s_at	15q11.1	EHD4	EH-domain containing 4	0.0302426	0	upregulated	0
209567_at	8q13.1	RRS1	RRS1 ribosome biogenesis regulator homolog (S. cerevisiae)	3.14339e-05	0	upregulated	upregulated
209583_s_at	3q12-q13	CD200	CD200 molecule	0.00152898	0	upregulated	downregulated
209586_s_at	1q21	PRUNE	prune homolog (Drosophila)	0.0158716	0	downregulated	0
209610_s_at	2p15-p13	SLC1A4	solute carrier family 1 (glutamate/neutral amino acid transporter), member 4	0.000929685	0	0	upregulated
209631_s_at	7q31	GPR37	G protein-coupled receptor 37 (endothelin receptor type B-like)	4.69399e-05	0	upregulated	downregulated
209645_s_at	9p11.1	ALDH1B1	aldehyde dehydrogenase 1 family, member B1	0.000436468	0	upregulated	0
209674_at	12q23-q24.1	CRY1	cryptochrome 1 (photolyase-like)	0.000664277	0	upregulated	upregulated
209682_at	3q13.11	CBLB	Cas-Br-M (murine) ecotropic retroviral transforming sequence b	0.00131672	0	upregulated	upregulated
209684_at	20p11.22	RIN2	Ras and Rab interactor 2	0.00104451	0	upregulated	downregulated
209723_at	6p25	SERPINB9	serpin peptidase inhibitor, clade B (ovalbumin), member 9	0.0120124	0	upregulated	downregulated
209725_at	12q23	UTP20	UTP20, small subunit (SSU) processome component, homolog (yeast)	0.00471349	0	0	upregulated
209741_x_at	15q24	SCAPER	S phase cyclin A-associated protein in the ER	0.00117889	0	downregulated	downregulated
209770_at	6p22.1	BTN3A1	butyrophilin, subfamily 3, member A1	0.0154523	0	0	downregulated
209774_x_at	4q21	CXCL2	chemokine (C-X-C motif) ligand 2	4.98911e-05	upregulated	upregulated	upregulated
209825_s_at	1q23	UCK2	uridine-cytidine kinase 2	0.00549214	0	upregulated	upregulated
209829_at	6p22.3-p21.32	FAM65B	family with sequence similarity 65, member B	0.00146002	0	upregulated	0
209864_at	10q24.1	FRAT2	frequently rearranged in advanced T-cell lymphomas 2	0.0332087	0	0	upregulated
209892_at	11q21	FUT4	fucosyltransferase 4 (alpha (1,3) fucosyltransferase, myeloid-specific)	0.0267639	0	upregulated	0
209893_s_at	11q21	FUT4	fucosyltransferase 4 (alpha (1,3) fucosyltransferase, myeloid-specific)	0.0309858	0	0	upregulated
209907_s_at	2pter-p25.1	ITSN2	intersectin 2	0.0021049	0	downregulated	0
209943_at	6q16.1-q16.3	FBXL4	F-box and leucine-rich repeat protein 4	0.0463987	0	downregulated	0
209959_at	9q22	NR4A3	nuclear receptor subfamily 4, group A, member 3	1.05571e-06	upregulated	upregulated	0
209971_x_at	7p22	JTV1	JTV1 gene	0.00531554	0	0	upregulated
210002_at	18q11.1-q11.2	GATA6	GATA binding protein 6	0.000543295	0	upregulated	0
210005_at	21q22.1	GART	phosphoribosylglycinamide formyltransferase, phosphoribosylglycinamide synthetase, phosphoribosylaminoimidazole synthetase	0.00386828	0	0	upregulated
210138_at	8q	RGS20	regulator of G-protein signaling 20	0.000928145	0	0	upregulated
210187_at	20p13	FKBP1A	FK506 binding protein 1A, 12kDa	0.0180436	0	0	upregulated
210233_at	3q28	IL1RAP	interleukin 1 receptor accessory protein	0.0252362	0	0	upregulated
210240_s_at	19p13	CDKN2D	cyclin-dependent kinase inhibitor 2D (p19, inhibits CDK4)	0.00795243	0	0	downregulated
210299_s_at	Xq26	FHL1	four and a half LIM domains 1	0.033016	0	0	upregulated
210310_s_at	4q21	FGF5	fibroblast growth factor 5	0.012184	0	0	downregulated
210357_s_at	20p13	SMOX	spermine oxidase	0.00247818	0	upregulated	upregulated
210410_s_at	6p21.3	MSH5	mutS homolog 5 (E. coli)	0.0374147	0	0	upregulated
210511_s_at	7p15-p13	INHBA	inhibin, beta A	7.90799e-05	0	upregulated	0
210524_x_at	NA	NA	NA	0.000140579	0	upregulated	upregulated
210612_s_at	6q25.3	SYNJ2	synaptojanin 2	0.00139914	0	upregulated	0
210688_s_at	11q13.1-q13.2	CPT1A	carnitine palmitoyltransferase 1A (liver)	0.000650582	0	0	upregulated
210757_x_at	5p13	DAB2	disabled homolog 2, mitogen-responsive phosphoprotein (Drosophila)	0.0101284	0	upregulated	upregulated
210762_s_at	8p22	DLC1	deleted in liver cancer 1	3.78921e-05	0	upregulated	0
210764_s_at	1p31-p22	CYR61	cysteine-rich, angiogenic inducer, 61	1.62762e-06	0	0	downregulated
210785_s_at	1p35.3	C1orf38	chromosome 1 open reading frame 38	0.000441471	0	downregulated	downregulated
210793_s_at	11p15.5	NUP98	nucleoporin 98kDa	0.00111618	0	upregulated	upregulated
210868_s_at	4q25	ELOVL6	ELOVL family member 6, elongation of long chain fatty acids (FEN1/Elo2, SUR4/Elo3-like, yeast)	0.0113052	0	0	downregulated
210954_s_at	3q25.1	TSC22D2	TSC22 domain family, member 2	0.000910771	0	0	downregulated
210986_s_at	15q22.1	TPM1	tropomyosin 1 (alpha)	6.94269e-05	0	upregulated	upregulated
210987_x_at	15q22.1	TPM1	tropomyosin 1 (alpha)	3.19226e-05	0	upregulated	upregulated
210988_s_at	1q21	PRUNE	prune homolog (Drosophila)	0.00425334	0	downregulated	0
211026_s_at	3q21.3	MGLL	monoglyceride lipase	0.00358351	0	upregulated	upregulated
211143_x_at	12q13	NR4A1	nuclear receptor subfamily 4, group A, member 1	0.00550164	upregulated	upregulated	0
211160_x_at	14q22-q24	ACTN1	actinin, alpha 1	0.00250789	0	upregulated	upregulated
211456_x_at	1q43	MT1P2	metallothionein 1 pseudogene 2	4.95855e-05	0	upregulated	upregulated
211506_s_at	4q13-q21	IL8	interleukin 8	0.00127291	0	0	downregulated
211518_s_at	14q22-q23	BMP4	bone morphogenetic protein 4	0.000481113	0	upregulated	downregulated
211559_s_at	4q21.1	CCNG2	cyclin G2	0.00174597	0	downregulated	0
211564_s_at	5q31.1	PDLIM4	PDZ and LIM domain 4	0.00359748	0	upregulated	upregulated
211576_s_at	21q22.3	SLC19A1	solute carrier family 19 (folate transporter), member 1	0.0347826	0	upregulated	upregulated
211681_s_at	4q22	PDLIM5	PDZ and LIM domain 5	0.000666039	0	upregulated	upregulated
211796_s_at	12q13.2	IL23A	interleukin 23, alpha subunit p19	0.00468858	0	0	upregulated
211980_at	13q34	COL4A1	collagen, type IV, alpha 1	0.0145515	0	upregulated	upregulated
212099_at	2p24	RHOB	ras homolog gene family, member B	1.60735e-05	0	upregulated	downregulated
212116_at	6p22	TRIM27	tripartite motif-containing 27	0.0123267	0	0	upregulated
212168_at	20q11.21	RBM12	RNA binding motif protein 12	0.0302472	0	upregulated	0
212185_x_at	16q13	MT2A	metallothionein 2A	0.000187096	0	upregulated	upregulated
212226_s_at	1pter-p22.1	PPAP2B	phosphatidic acid phosphatase type 2B	0.00106339	0	upregulated	upregulated
212230_at	1pter-p22.1	PPAP2B	phosphatidic acid phosphatase type 2B	0.00181861	0	upregulated	upregulated
212281_s_at	17q11.2	TMEM97	transmembrane protein 97	2.15223e-05	0	0	upregulated
212282_at	17q11.2	TMEM97	transmembrane protein 97	2.15223e-05	0	0	upregulated
212290_at	13q12-q14	SLC7A1	solute carrier family 7 (cationic amino acid transporter, y+ system), member 1	0.00529295	0	upregulated	upregulated
212295_s_at	13q12-q14	SLC7A1	solute carrier family 7 (cationic amino acid transporter, y+ system), member 1	0.00193104	0	upregulated	upregulated
212306_at	3p22.3	CLASP2	cytoplasmic linker associated protein 2	0.0487965	0	0	downregulated
212311_at	4p15.2	KIAA0746	KIAA0746 protein	0.0026955	0	upregulated	upregulated
212314_at	4p15.2	KIAA0746	KIAA0746 protein	0.00283292	0	upregulated	upregulated
212324_s_at	1p36.22	VPS13D	vacuolar protein sorting 13 homolog D (S. cerevisiae)	0.00309048	0	0	downregulated
212326_at	1p36.22	VPS13D	vacuolar protein sorting 13 homolog D (S. cerevisiae)	0.00089815	0	0	downregulated
212412_at	4q22	PDLIM5	PDZ and LIM domain 5	0.000143472	0	upregulated	upregulated
212422_at	10q24.33	PDCD11	programmed cell death 11	0.00181861	0	0	upregulated
212444_at	NA	NA	NA	0.000563016	0	upregulated	0
212445_s_at	18q21	NEDD4L	neural precursor cell expressed, developmentally down-regulated 4-like	0.00311869	0	upregulated	0
212456_at	17p13.3	KIAA0664	KIAA0664	0.0213291	0	upregulated	upregulated
212472_at	11p15.3	MICAL2	microtubule associated monoxygenase, calponin and LIM domain containing 2	0.00114871	0	upregulated	upregulated
212473_s_at	11p15.3	MICAL2	microtubule associated monoxygenase, calponin and LIM domain containing 2	0.00128978	0	upregulated	upregulated
212501_at	20q13.1	CEBPB	CCAAT/enhancer binding protein (C/EBP), beta	0.00124975	0	upregulated	upregulated
212563_at	8q24.3	BOP1	block of proliferation 1	0.00470953	0	0	upregulated
212613_at	6p22.1	BTN3A2	butyrophilin, subfamily 3, member A2	0.00596175	0	0	downregulated
212614_at	10q21.2	ARID5B	AT rich interactive domain 5B (MRF1-like)	0.00162891	0	upregulated	0
212641_at	6q23-q24	HIVEP2	human immunodeficiency virus type I enhancer binding protein 2	0.00144496	0	upregulated	0
212642_s_at	6q23-q24	HIVEP2	human immunodeficiency virus type I enhancer binding protein 2	0.00132737	0	upregulated	0
212651_at	10q21.2	RHOBTB1	Rho-related BTB domain containing 1	0.0147963	0	0	upregulated
212662_at	19q13.2	PVR	poliovirus receptor	6.45094e-05	0	upregulated	upregulated
212665_at	3q25.31	TIPARP	TCDD-inducible poly(ADP-ribose) polymerase	0.00240443	0	0	downregulated
212675_s_at	2p14	CEP68	centrosomal protein 68kDa	0.0104776	0	downregulated	0
212677_s_at	2p14	CEP68	centrosomal protein 68kDa	0.0228621	0	downregulated	0
212689_s_at	2p11.2	JMJD1A	jumonji domain containing 1A	0.00199365	0	downregulated	downregulated
212710_at	9q34.3	CAMSAP1	calmodulin regulated spectrin-associated protein 1	0.0390359	0	upregulated	0
212774_at	1q44-qter	ZNF238	zinc finger protein 238	0.000697978	0	upregulated	downregulated
212805_at	9q21.13	PRUNE2	prune homolog 2 (Drosophila)	7.75051e-05	0	0	upregulated
212810_s_at	2p15-p13	SLC1A4	solute carrier family 1 (glutamate/neutral amino acid transporter), member 4	0.00208716	0	upregulated	upregulated
212811_x_at	2p15-p13	SLC1A4	solute carrier family 1 (glutamate/neutral amino acid transporter), member 4	0.00169687	0	0	upregulated
212822_at	3q21.2	HEG1	HEG homolog 1 (zebrafish)	0.0479151	0	0	upregulated
212828_at	6q25.3	SYNJ2	synaptojanin 2	0.00113702	0	upregulated	0
212830_at	9q32-q33.3	MEGF9	multiple EGF-like-domains 9	0.0017866	0	downregulated	0
212845_at	14q22.2	SAMD4A	sterile alpha motif domain containing 4A	1.33257e-05	0	upregulated	0
212859_x_at	16q13	MT1E	metallothionein 1E	1.96037e-06	0	upregulated	upregulated
212867_at	NA	NA	NA	0.00720834	0	downregulated	downregulated
212907_at	1q32-q41	SLC30A1	solute carrier family 30 (zinc transporter), member 1	0.00353993	0	upregulated	0
212923_s_at	6p25.2	C6orf145	chromosome 6 open reading frame 145	0.00025309	0	upregulated	0
212942_s_at	15q24	KIAA1199	KIAA1199	0.000792017	0	upregulated	upregulated
212977_at	2q37.3	CXCR7	chemokine (C-X-C motif) receptor 7	5.36857e-07	0	upregulated	upregulated
212996_s_at	21q22.11	URB1	URB1 ribosome biogenesis 1 homolog (S. cerevisiae)	0.0274125	0	0	upregulated
213006_at	8p11.2-p11.1	CEBPD	CCAAT/enhancer binding protein (C/EBP), delta	3.30123e-05	0	upregulated	0
213073_at	14q24.1	ZFYVE26	zinc finger, FYVE domain containing 26	0.0201938	0	downregulated	upregulated
213085_s_at	5q35.1	WWC1	WW and C2 domain containing 1	0.000287328	0	upregulated	upregulated
213139_at	8q11	SNAI2	snail homolog 2 (Drosophila)	6.32695e-05	upregulated	upregulated	0
213182_x_at	11p15.5	CDKN1C	cyclin-dependent kinase inhibitor 1C (p57, Kip2)	0.00687271	0	downregulated	0
213212_x_at	15q25.2	FLJ40113	golgi autoantigen, golgin subfamily a-like pseudogene	0.0316234	0	downregulated	0
213227_at	4q26	PGRMC2	progesterone receptor membrane component 2	0.000524664	0	upregulated	upregulated
213247_at	9q32	SVEP1	sushi, von Willebrand factor type A, EGF and pentraxin domain containing 1	0.0061269	0	upregulated	upregulated
213260_at	6p25	FOXC1	forkhead box C1	0.000855708	0	upregulated	0
213349_at	3q21.3	TMCC1	transmembrane and coiled-coil domain family 1	0.000793639	0	downregulated	0
213351_s_at	3q21.3	TMCC1	transmembrane and coiled-coil domain family 1	0.000105381	0	downregulated	0
213359_at	4q21.1-q21.2	HNRNPD	heterogeneous nuclear ribonucleoprotein D (AU-rich element RNA binding protein 1, 37kDa)	0.0252501	0	downregulated	downregulated
213413_at	2p16.3	GTF2A1L	general transcription factor IIA, 1-like	0.000143222	0	downregulated	downregulated
213424_at	7p14.2	KIAA0895	KIAA0895	0.0444014	0	downregulated	0
213425_at	3p21-p14	WNT5A	wingless-type MMTV integration site family, member 5A	0.00286042	0	upregulated	upregulated
213449_at	8q22.1	POP1	processing of precursor 1, ribonuclease P/MRP subunit (S. cerevisiae)	0.00749787	0	upregulated	upregulated
213554_s_at	3q22.1	CDV3	CDV3 homolog (mouse)	0.00179175	0	upregulated	upregulated
213568_at	8q22.2	OSR2	odd-skipped related 2 (Drosophila)	0.0319524	0	upregulated	0
213625_at	6p21.33-p21.31	ZKSCAN4	zinc finger with KRAB and SCAN domains 4	0.00686701	0	0	upregulated
213629_x_at	16q13	MT1F	metallothionein 1F	1.90554e-05	0	upregulated	upregulated
213639_s_at	16p13.3	ZNF500	zinc finger protein 500	0.00517333	0	0	upregulated
213684_s_at	4q22	PDLIM5	PDZ and LIM domain 5	0.000852888	downregulated	upregulated	0
213761_at	12q15	MDM1	Mdm1 nuclear protein homolog (mouse)	0.0453732	0	downregulated	0
213790_at	10q26.3	ADAM12	ADAM metallopeptidase domain 12	0.0020426	0	0	upregulated
213895_at	12p12.3	EMP1	epithelial membrane protein 1	0.00767481	0	upregulated	downregulated
213916_at	19p13.3-p13.2	ZNF20	zinc finger protein 20	0.016575	0	downregulated	upregulated
213983_s_at	4p14	PDS5A	PDS5, regulator of cohesion maintenance, homolog A (S. cerevisiae)	0.0158451	0	0	upregulated
214011_s_at	5q35.2	NOP16	NOP16 nucleolar protein homolog (yeast)	0.000419609	0	upregulated	upregulated
214048_at	3q21-q22	MBD4	methyl-CpG binding domain protein 4	0.00407397	0	0	upregulated
214132_at	10p15.1	ATP5C1	ATP synthase, H+ transporting, mitochondrial F1 complex, gamma polypeptide 1	0.000826964	0	0	upregulated
214138_at	9q34	ZNF79	zinc finger protein 79	0.0372264	0	0	upregulated
214175_x_at	5q31.1	PDLIM4	PDZ and LIM domain 4	0.00987826	0	upregulated	upregulated
214193_s_at	1q32.2	C1orf107	chromosome 1 open reading frame 107	0.00334893	0	upregulated	upregulated
214241_at	10q23.2-q23.33	NDUFB8	NADH dehydrogenase (ubiquinone) 1 beta subcomplex, 8, 19kDa	0.000445779	0	upregulated	upregulated
214285_at	1p33-p32	FABP3	fatty acid binding protein 3, muscle and heart (mammary-derived growth inhibitor)	1.96037e-06	0	0	upregulated
214321_at	8q24.1	NOV	nephroblastoma overexpressed gene	0.00822252	0	0	upregulated
214329_x_at	3q26	TNFSF10	tumor necrosis factor (ligand) superfamily, member 10	0.000760144	0	downregulated	downregulated
214427_at	12p13	NOP2	NOP2 nucleolar protein homolog (yeast)	0.00274906	0	upregulated	upregulated
214438_at	1q41-q42.1	HLX	H2.0-like homeobox	0.000427648	0	upregulated	0
214446_at	5q15	ELL2	elongation factor, RNA polymerase II, 2	0.00168147	0	upregulated	0
214462_at	18q22.2	SOCS6	suppressor of cytokine signaling 6	0.0149821	0	0	downregulated
214581_x_at	6p21.1-p12.2	TNFRSF21	tumor necrosis factor receptor superfamily, member 21	0.00228818	0	0	upregulated
214583_at	1p36.1	RSC1A1	regulatory solute carrier protein, family 1, member 1	0.016706	0	0	upregulated
214608_s_at	8q13.3	EYA1	eyes absent homolog 1 (Drosophila)	0.00978862	0	downregulated	0
214639_s_at	7p15.3	HOXA1	homeobox A1	0.00099702	upregulated	0	downregulated
214696_at	17p13.3	C17orf91	chromosome 17 open reading frame 91	1.60735e-05	0	upregulated	0
214706_at	16p13.3	ZNF200	zinc finger protein 200	0.00984617	0	0	upregulated
214755_at	9q34.3	UAP1L1	UDP-N-acteylglucosamine pyrophosphorylase 1-like 1	0.00145942	0	0	upregulated
214769_at	Xp22.3	CLCN4	chloride channel 4	0.0231589	0	upregulated	upregulated
214790_at	6q13-q14.3	SENP6	SUMO1/sentrin specific peptidase 6	0.0356316	0	0	upregulated
214954_at	3p22.3	SUSD5	sushi domain containing 5	0.00117083	0	0	upregulated
214963_at	11p11.2	NUP160	nucleoporin 160kDa	0.000596967	0	upregulated	upregulated
214965_at	16q24.3	SPATA2L	spermatogenesis associated 2-like	0.0311733	0	upregulated	0
215011_at	1p36.1	SNHG3	small nucleolar RNA host gene 3 (non-protein coding)	0.00598481	0	0	upregulated
215034_s_at	3q21-q25	TM4SF1	transmembrane 4 L six family member 1	1.50807e-05	0	upregulated	upregulated
215073_s_at	15q26	NR2F2	nuclear receptor subfamily 2, group F, member 2	0.017136	0	upregulated	0
215185_at	NA	NA	NA	0.000382737	0	upregulated	upregulated
215195_at	17q22-q23.2	PRKCA	protein kinase C, alpha	0.00489733	0	0	upregulated
215198_s_at	7q33	CALD1	caldesmon 1	0.0286238	0	downregulated	downregulated
215199_at	7q33	CALD1	caldesmon 1	0.000166169	0	downregulated	downregulated
215224_at	17q12	SNORA21	small nucleolar RNA, H/ACA box 21	0.0113547	0	0	upregulated
215306_at	NA	NA	NA	0.0159323	0	0	downregulated
215418_at	11p15.3	PARVA	parvin, alpha	0.0134958	0	0	downregulated
215470_at	5q12.2-q13.3	GTF2H2	general transcription factor IIH, polypeptide 2, 44kDa	0.000506896	0	0	upregulated
215498_s_at	17q11.2	MAP2K3	mitogen-activated protein kinase kinase 3	0.00424029	0	upregulated	0
215499_at	17q11.2	MAP2K3	mitogen-activated protein kinase kinase 3	0.00350148	0	upregulated	0
215506_s_at	1p31	DIRAS3	DIRAS family, GTP-binding RAS-like 3	0.000588793	0	upregulated	upregulated
215517_at	15q21.1	PYGO1	pygopus homolog 1 (Drosophila)	0.00751782	0	upregulated	upregulated
215990_s_at	3q27	BCL6	B-cell CLL/lymphoma 6	0.0127625	0	0	downregulated
216005_at	9q33	TNC	tenascin C	0.0208051	0	0	downregulated
216049_at	5q15	RHOBTB3	Rho-related BTB domain containing 3	0.00046271	0	upregulated	upregulated
216060_s_at	14q23.1	DAAM1	dishevelled associated activator of morphogenesis 1	0.000472649	0	0	downregulated
216074_x_at	5q35.1	WWC1	WW and C2 domain containing 1	0.000333944	0	upregulated	upregulated
216180_s_at	6q25.3	SYNJ2	synaptojanin 2	0.00987826	0	upregulated	upregulated
216181_at	6q25.3	SYNJ2	synaptojanin 2	0.00543729	0	0	downregulated
216212_s_at	Xq28	DKC1	dyskeratosis congenita 1, dyskerin	0.0133887	0	0	upregulated
216268_s_at	20p12.1-p11.23	JAG1	jagged 1 (Alagille syndrome)	0.0015084	0	upregulated	0
216336_x_at	16q13	MT1E	metallothionein 1E	0.000147964	0	upregulated	upregulated
216598_s_at	17q11.2-q12	CCL2	chemokine (C-C motif) ligand 2	1.24591e-05	0	upregulated	upregulated
216804_s_at	4q22	PDLIM5	PDZ and LIM domain 5	0.000855367	0	upregulated	upregulated
217047_s_at	4q22.1	FAM13A	family with sequence similarity 13, member A	0.000319309	0	downregulated	downregulated
217150_s_at	22q12.2	NF2	neurofibromin 2 (merlin)	0.0121349	0	0	upregulated
217152_at	NA	NA	NA	0.000203642	0	0	upregulated
217165_x_at	16q13	MT1F	metallothionein 1F	1.38706e-05	0	upregulated	upregulated
217168_s_at	16q12.2-q13	HERPUD1	homocysteine-inducible, endoplasmic reticulum stress-inducible, ubiquitin-like domain member 1	0.00522368	0	upregulated	upregulated
217312_s_at	3p21.1	COL7A1	collagen, type VII, alpha 1	0.023581	0	0	upregulated
217317_s_at	15q11.2	HERC2P2	hect domain and RLD 2 pseudogene 2	0.00180651	0	0	upregulated
217370_x_at	16p11.2	FUS	fusion (involved in t(12;16) in malignant liposarcoma)	0.00291985	0	upregulated	upregulated
217506_at	NA	NA	NA	0.00163148	0	0	upregulated
217546_at	16q13	MT1M	metallothionein 1M	3.11878e-07	0	upregulated	upregulated
217625_x_at	NA	NA	NA	0.00206235	0	upregulated	upregulated
217627_at	19q13.12	ZNF573	zinc finger protein 573	0.00892576	0	downregulated	0
217687_at	5p15.3	ADCY2	adenylate cyclase 2 (brain)	0.00206116	0	0	upregulated
217820_s_at	1q42.12	ENAH	enabled homolog (Drosophila)	0.0137048	0	upregulated	upregulated
217841_s_at	11q13.4	PPME1	protein phosphatase methylesterase 1	0.0383014	0	0	upregulated
217997_at	12q15	PHLDA1	pleckstrin homology-like domain, family A, member 1	0.000374908	0	upregulated	upregulated
217998_at	12q15	PHLDA1	pleckstrin homology-like domain, family A, member 1	0.0312599	0	upregulated	0
217999_s_at	12q15	PHLDA1	pleckstrin homology-like domain, family A, member 1	0.0127951	0	upregulated	0
218113_at	9q13-q21	TMEM2	transmembrane protein 2	0.0106703	0	upregulated	0
218145_at	20p13-p12.2	TRIB3	tribbles homolog 3 (Drosophila)	0.00163562	0	upregulated	upregulated
218156_s_at	17p13.3	TSR1	TSR1, 20S rRNA accumulation, homolog (S. cerevisiae)	0.028832	0	0	upregulated
218161_s_at	15q23	CLN6	ceroid-lipofuscinosis, neuronal 6, late infantile, variant	0.0242766	0	0	upregulated
218177_at	18p11.21	CHMP1B	chromatin modifying protein 1B	0.00569873	0	upregulated	0
218178_s_at	18p11.21	CHMP1B	chromatin modifying protein 1B	0.00396931	0	upregulated	0
218192_at	3p21.31	IP6K2	inositol hexakisphosphate kinase 2	0.0265952	0	0	downregulated
218199_s_at	9p13.3	NOL6	nucleolar protein family 6 (RNA-associated)	0.0169271	0	0	upregulated
218219_s_at	7q31.1-q31.33	LANCL2	LanC lantibiotic synthetase component C-like 2 (bacterial)	0.00617901	0	upregulated	upregulated
218237_s_at	12q13.11	SLC38A1	solute carrier family 38, member 1	0.0382907	0	0	upregulated
218248_at	11q12.1	FAM111A	family with sequence similarity 111, member A	0.0178748	0	downregulated	downregulated
218259_at	16p13.12	MKL2	MKL/myocardin-like 2	0.012635	0	downregulated	0
218273_s_at	8q22.1	PPM2C	protein phosphatase 2C, magnesium-dependent, catalytic subunit	0.00226791	0	0	downregulated
218284_at	15q22.33	SMAD3	SMAD family member 3	0.0205827	0	upregulated	0
218292_s_at	7q36.1	PRKAG2	protein kinase, AMP-activated, gamma 2 non-catalytic subunit	0.0048455	0	upregulated	0
218305_at	14q12	IPO4	importin 4	0.0203683	0	0	upregulated
218332_at	Xq21-q23	BEX1	brain expressed, X-linked 1	0.00114871	0	0	upregulated
218346_s_at	6q21	SESN1	sestrin 1	0.00265296	0	downregulated	0
218368_s_at	16p13.3	TNFRSF12A	tumor necrosis factor receptor superfamily, member 12A	6.35274e-05	0	upregulated	upregulated
218370_s_at	1p35.1	S100PBP	S100P binding protein	0.00997214	0	downregulated	0
218401_s_at	1q32.1	ZNF281	zinc finger protein 281	0.000108382	0	downregulated	downregulated
218431_at	14q24.3-q31	C14orf133	chromosome 14 open reading frame 133	0.0295324	0	downregulated	0
218432_at	11p13	FBXO3	F-box protein 3	0.0378127	0	0	downregulated
218458_at	2p13.3	GMCL1	germ cell-less homolog 1 (Drosophila)	0.038801	0	downregulated	0
218468_s_at	15q13-q15	GREM1	gremlin 1, cysteine knot superfamily, homolog (Xenopus laevis)	2.38982e-05	0	upregulated	upregulated
218469_at	15q13-q15	GREM1	gremlin 1, cysteine knot superfamily, homolog (Xenopus laevis)	0.00199998	0	upregulated	upregulated
218486_at	2p25	KLF11	Kruppel-like factor 11	0.00111025	0	upregulated	0
218501_at	3p21-p13	ARHGEF3	Rho guanine nucleotide exchange factor (GEF) 3	0.00430063	0	0	downregulated
218544_s_at	9p24.1-p23	RCL1	RNA terminal phosphate cyclase-like 1	0.0026407	0	upregulated	upregulated
218590_at	10q23.3-q24.3	C10orf2	chromosome 10 open reading frame 2	0.00565016	0	upregulated	upregulated
218611_at	1q25.3	IER5	immediate early response 5	0.00480542	0	0	downregulated
218631_at	10q24.2	AVPI1	arginine vasopressin-induced 1	0.000323911	0	upregulated	upregulated
218658_s_at	NA	ACTR8	ARP8 actin-related protein 8 homolog (yeast)	0.0149163	0	0	upregulated
218670_at	12q24.33	PUS1	pseudouridylate synthase 1	0.00583126	0	upregulated	upregulated
218676_s_at	17q21-q24	PCTP	phosphatidylcholine transfer protein	0.00293038	0	downregulated	0
218691_s_at	5q31.1	PDLIM4	PDZ and LIM domain 4	0.00212093	0	upregulated	upregulated
218706_s_at	5q23.2	GRAMD3	GRAM domain containing 3	0.00802911	0	0	downregulated
218717_s_at	3q28	LEPREL1	leprecan-like 1	0.0036504	0	upregulated	upregulated
218726_at	2q37.1	HJURP	Holliday junction recognition protein	0.0036504	0	downregulated	0
218758_s_at	21q22.3	RRP1	ribosomal RNA processing 1 homolog (S. cerevisiae)	0.00181293	0	upregulated	upregulated
218796_at	20p12.3	FERMT1	fermitin family homolog 1 (Drosophila)	0.0385296	0	0	upregulated
218803_at	12q24.33	CHFR	checkpoint with forkhead and ring finger domains	0.0248656	0	0	upregulated
218818_at	1p34	FHL3	four and a half LIM domains 3	0.0171033	0	upregulated	0
218846_at	6q22.33-q24.1	MED23	mediator complex subunit 23	0.0459221	0	downregulated	0
218856_at	6p21.1-p12.2	TNFRSF21	tumor necrosis factor receptor superfamily, member 21	0.000792017	0	upregulated	upregulated
218868_at	7q36.1	ACTR3B	ARP3 actin-related protein 3 homolog B (yeast)	0.00247617	0	0	upregulated
218880_at	2p23.3	FOSL2	FOS-like antigen 2	2.36238e-05	0	upregulated	upregulated
218881_s_at	2p23.3	FOSL2	FOS-like antigen 2	0.00932332	0	upregulated	0
218897_at	2q14.2	TMEM177	transmembrane protein 177	0.0114325	0	0	upregulated
218898_at	17p13.3	FAM57A	family with sequence similarity 57, member A	0.000382737	0	upregulated	upregulated
218901_at	3q24	PLSCR4	phospholipid scramblase 4	0.00598481	0	downregulated	0
218904_s_at	9q21.13	C9orf40	chromosome 9 open reading frame 40	0.00638732	0	downregulated	upregulated
218984_at	7q22.2	PUS7	pseudouridylate synthase 7 homolog (S. cerevisiae)	0.00349844	0	upregulated	upregulated
218995_s_at	6p24.1	EDN1	endothelin 1	0.00260063	0	0	downregulated
218997_at	9p13.2	POLR1E	polymerase (RNA) I polypeptide E, 53kDa	0.00146002	0	upregulated	upregulated
219016_at	20p13	FASTKD5	FAST kinase domains 5	0.00219209	0	0	downregulated
219062_s_at	18q21.33	ZCCHC2	zinc finger, CCHC domain containing 2	0.00388269	0	upregulated	0
219081_at	5q31.3	ANKHD1	ankyrin repeat and KH domain containing 1	0.00525069	0	upregulated	upregulated
219128_at	2p14	C2orf42	chromosome 2 open reading frame 42	0.0112866	0	0	upregulated
219131_at	1p36-p34.1	UBIAD1	UbiA prenyltransferase domain containing 1	0.0207378	0	upregulated	upregulated
219178_at	3q13.31	QTRTD1	queuine tRNA-ribosyltransferase domain containing 1	0.0356316	0	0	upregulated
219179_at	14q23.1	DACT1	dapper, antagonist of beta-catenin, homolog 1 (Xenopus laevis)	3.06889e-05	0	upregulated	0
219181_at	18q21.1	LIPG	lipase, endothelial	2.42421e-05	0	0	upregulated
219257_s_at	17q25.2	SPHK1	sphingosine kinase 1	2.42421e-05	0	upregulated	upregulated
219270_at	15q15.1	CHAC1	ChaC, cation transport regulator homolog 1 (E. coli)	0.000697978	0	upregulated	upregulated
219383_at	11p13-p12	FLJ14213	protor-2	0.0048286	0	0	upregulated
219397_at	2q33.1	COQ10B	coenzyme Q10 homolog B (S. cerevisiae)	0.0298534	0	0	downregulated
219427_at	4q28.1	FAT4	FAT tumor suppressor homolog 4 (Drosophila)	0.0235015	0	0	upregulated
219492_at	4q11	CHIC2	cysteine-rich hydrophobic domain 2	0.00286442	0	upregulated	0
219496_at	2q13	ANKRD57	ankyrin repeat domain 57	0.0157832	0	0	downregulated
219500_at	11q13.3	CLCF1	cardiotrophin-like cytokine factor 1	0.00655728	0	upregulated	0
219511_s_at	5q23.1-q23.3	SNCAIP	synuclein, alpha interacting protein	0.0121409	0	downregulated	0
219522_at	11p13	FJX1	four jointed box 1 (Drosophila)	0.000143222	0	upregulated	0
219543_at	10pter-q25.3	PBLD	phenazine biosynthesis-like protein domain containing	0.0297082	0	0	upregulated
219546_at	4q21.21	BMP2K	BMP2 inducible kinase	0.000481894	0	upregulated	upregulated
219551_at	3q13.33	EAF2	ELL associated factor 2	0.0336016	0	0	0
219560_at	22q11.21	C22orf29	chromosome 22 open reading frame 29	0.000217525	0	upregulated	upregulated
219563_at	14q32.13	C14orf139	chromosome 14 open reading frame 139	0.0278292	0	0	downregulated
219570_at	20p11.23	KIF16B	kinesin family member 16B	0.00667928	0	downregulated	downregulated
219581_at	3p25.1	TSEN2	tRNA splicing endonuclease 2 homolog (S. cerevisiae)	0.0375211	0	0	upregulated
219596_at	15q23	THAP10	THAP domain containing 10	0.0130832	0	downregulated	0
219627_at	7q36.1	ZNF767	zinc finger family member 767	0.00156206	0	0	upregulated
219682_s_at	12q24.1	TBX3	T-box 3	0.0197235	0	upregulated	0
219749_at	8p21.2	SH2D4A	SH2 domain containing 4A	0.00104451	0	upregulated	upregulated
219807_x_at	19q13.2	RAB4B	RAB4B, member RAS oncogene family	0.0184047	0	0	downregulated
219826_at	19q13.43	ZNF419	zinc finger protein 419	0.00470802	0	0	upregulated
219831_at	5q31	CDKL3	cyclin-dependent kinase-like 3	0.0281566	0	downregulated	downregulated
219885_at	17q12	SLFN12	schlafen family member 12	0.0211777	0	0	downregulated
219889_at	10q24.1	FRAT1	frequently rearranged in advanced T-cell lymphomas	0.0231419	0	0	upregulated
219904_at	19q13.43	ZSCAN5A	zinc finger and SCAN domain containing 5A	0.0236297	0	upregulated	0
219936_s_at	3q24	GPR87	G protein-coupled receptor 87	3.2249e-06	0	upregulated	upregulated
219949_at	3p21.31	LRRC2	leucine rich repeat containing 2	0.000714818	0	upregulated	upregulated
219951_s_at	20p11.23	C20orf12	chromosome 20 open reading frame 12	0.00816085	0	downregulated	upregulated
219985_at	17p12-p11.2	HS3ST3A1	heparan sulfate (glucosamine) 3-O-sulfotransferase 3A1	0.00435274	0	0	upregulated
220014_at	5q23.1	PRR16	proline rich 16	0.00584277	0	0	upregulated
220046_s_at	3q25.32	CCNL1	cyclin L1	0.0266937	0	downregulated	downregulated
220092_s_at	2p13.1	ANTXR1	anthrax toxin receptor 1	0.00135852	0	upregulated	upregulated
220147_s_at	12p11	FAM60A	family with sequence similarity 60, member A	0.0016408	0	upregulated	downregulated
220235_s_at	1p13.3	C1orf103	chromosome 1 open reading frame 103	0.0151039	0	downregulated	0
220251_at	1q32.2	C1orf107	chromosome 1 open reading frame 107	0.00163397	0	upregulated	0
220272_at	9p22.3-p22.2	BNC2	basonuclin 2	0.0314612	0	downregulated	0
220370_s_at	17q25.3	USP36	ubiquitin specific peptidase 36	0.00634333	0	upregulated	0
220382_s_at	18p11.31	ARHGAP28	Rho GTPase activating protein 28	0.000166169	0	upregulated	upregulated
220668_s_at	20q11.2	DNMT3B	DNA (cytosine-5-)-methyltransferase 3 beta	0.0030394	0	downregulated	0
220688_s_at	1p36.13	MRTO4	mRNA turnover 4 homolog (S. cerevisiae)	0.00118923	0	0	upregulated
220751_s_at	5q31-q32	C5orf4	chromosome 5 open reading frame 4	0.000576738	upregulated	0	0
220765_s_at	2q14.3	LIMS2	LIM and senescent cell antigen-like domains 2	0.0459499	0	0	upregulated
220817_at	13q13.1-q13.2	TRPC4	transient receptor potential cation channel, subfamily C, member 4	0.000272485	0	upregulated	upregulated
220818_s_at	13q13.1-q13.2	TRPC4	transient receptor potential cation channel, subfamily C, member 4	0.00441981	0	upregulated	upregulated
220892_s_at	9q21.2	PSAT1	phosphoserine aminotransferase 1	0.026246	0	0	upregulated
220954_s_at	7q22.1	PILRB	paired immunoglobin-like type 2 receptor beta	0.0124575	0	0	upregulated
220969_s_at	NA	NA	NA	0.0300173	0	0	upregulated
221009_s_at	19p13.3	ANGPTL4	angiopoietin-like 4	1.02976e-06	0	upregulated	upregulated
221011_s_at	2p23.1	LBH	limb bud and heart development homolog (mouse)	6.68041e-06	0	upregulated	0
221208_s_at	11q24.2	C11orf61	chromosome 11 open reading frame 61	0.00163724	0	downregulated	0
221256_s_at	9q32	HDHD3	haloacid dehalogenase-like hydrolase domain containing 3	0.0190944	0	downregulated	0
221272_s_at	1q25	C1orf21	chromosome 1 open reading frame 21	0.0115059	0	0	downregulated
221276_s_at	1p34.3-p33	SYNC	syncoilin, intermediate filament protein	0.000604145	0	upregulated	upregulated
221480_at	4q21.1-q21.2	HNRNPD	heterogeneous nuclear ribonucleoprotein D (AU-rich element RNA binding protein 1, 37kDa)	0.0227046	0	0	upregulated
221541_at	16q24.1	CRISPLD2	cysteine-rich secretory protein LCCL domain containing 2	5.7895e-06	0	upregulated	upregulated
221558_s_at	4q23-q25	LEF1	lymphoid enhancer-binding factor 1	0.00862511	0	0	upregulated
221563_at	1q41	DUSP10	dual specificity phosphatase 10	0.000193758	0	upregulated	downregulated
221649_s_at	19p13	PPAN	peter pan homolog (Drosophila)	0.000938401	0	upregulated	upregulated
221667_s_at	12q24.23	HSPB8	heat shock 22kDa protein 8	0.0344197	0	upregulated	0
221709_s_at	14q32.31	ZNF839	zinc finger protein 839	0.0367252	0	0	upregulated
221779_at	22q13.1-q13.2	MICALL1	MICAL-like 1	0.0415015	0	0	upregulated
221800_s_at	17q25.3	C17orf70	chromosome 17 open reading frame 70	0.0482794	0	0	upregulated
221805_at	8p21	NEFL	neurofilament, light polypeptide	0.00525069	0	0	upregulated
221840_at	10q26	PTPRE	protein tyrosine phosphatase, receptor type, E	0.0141011	0	0	upregulated
221841_s_at	9q31	KLF4	Kruppel-like factor 4 (gut)	0.039047	0	upregulated	0
221873_at	11p15.4	ZNF143	zinc finger protein 143	0.0190117	0	0	downregulated
221907_at	14q32.33	TRMT61A	tRNA methyltransferase 61 homolog A (S. cerevisiae)	0.0215405	0	upregulated	upregulated
221919_at	12q13.13	LOC728844	hypothetical LOC728844	0.0217949	0	downregulated	0
221922_at	1p13.3	GPSM2	G-protein signaling modulator 2 (AGS3-like, C. elegans)	0.00345954	0	downregulated	downregulated
221963_x_at	NA	NA	NA	0.00263552	0	upregulated	upregulated
221987_s_at	17p13.3	TSR1	TSR1, 20S rRNA accumulation, homolog (S. cerevisiae)	0.0115494	0	0	upregulated
221994_at	4q22	PDLIM5	PDZ and LIM domain 5	8.16997e-07	0	upregulated	upregulated
222013_x_at	16p13.3	FAM86A	family with sequence similarity 86, member A	0.0261322	0	0	upregulated
222108_at	12q13.11	AMIGO2	adhesion molecule with Ig-like domain 2	6.13861e-06	0	upregulated	upregulated
222150_s_at	7q11.23	PION	pigeon homolog (Drosophila)	0.0398375	0	0	downregulated
222173_s_at	9q22.33	TBC1D2	TBC1 domain family, member 2	0.00342238	0	0	upregulated
222258_s_at	2q37.1-q37.2	SH3BP4	SH3-domain binding protein 4	0.000493729	0	upregulated	upregulated
222303_at	NA	NA	NA	0.00108183	0	0	downregulated
222305_at	2p13	HK2	hexokinase 2	0.000307771	0	upregulated	upregulated
222561_at	7q31.1-q31.33	LANCL2	LanC lantibiotic synthetase component C-like 2 (bacterial)	0.0170223	0	upregulated	upregulated
222572_at	8q22.1	PPM2C	protein phosphatase 2C, magnesium-dependent, catalytic subunit	2.43518e-05	0	0	downregulated
222582_at	7q36.1	PRKAG2	protein kinase, AMP-activated, gamma 2 non-catalytic subunit	0.00085515	0	upregulated	0
222584_at	1q22	MSTO1	misato homolog 1 (Drosophila)	0.0353545	0	0	upregulated
222605_at	1q32.2-q32.3	RCOR3	REST corepressor 3	0.0158451	0	downregulated	upregulated
222610_s_at	1p35.1	S100PBP	S100P binding protein	0.00329278	0	downregulated	0
222619_at	1q32.1	ZNF281	zinc finger protein 281	0.000634437	0	downregulated	downregulated
222666_s_at	9p24.1-p23	RCL1	RNA terminal phosphate cyclase-like 1	0.00190736	0	upregulated	upregulated
222748_s_at	16q22.3	TXNL4B	thioredoxin-like 4B	0.0272381	0	0	upregulated
222802_at	6p24.1	EDN1	endothelin 1	6.26191e-06	0	0	downregulated
222830_at	2p25.1	GRHL1	grainyhead-like 1 (Drosophila)	0.00058623	0	0	downregulated
222869_s_at	18q21	ELAC1	elaC homolog 1 (E. coli)	0.0125018	0	0	upregulated
222872_x_at	2q32.3	OBFC2A	oligonucleotide/oligosaccharide-binding fold containing 2A	9.41868e-05	0	upregulated	upregulated
222875_at	17p13.2	DHX33	DEAH (Asp-Glu-Ala-His) box polypeptide 33	0.00485705	0	upregulated	upregulated
223018_at	16q22.3	NOB1	NIN1/RPN12 binding protein 1 homolog (S. cerevisiae)	0.00855522	0	0	upregulated
223044_at	2q32	SLC40A1	solute carrier family 40 (iron-regulated transporter), member 1	0.0174233	0	downregulated	0
223062_s_at	9q21.2	PSAT1	phosphoserine aminotransferase 1	0.00175436	0	0	upregulated
223076_s_at	5p15.31	NSUN2	NOL1/NOP2/Sun domain family, member 2	0.00816085	0	upregulated	upregulated
223093_at	5p15.1	ANKH	ankylosis, progressive homolog (mouse)	0.0161677	0	upregulated	upregulated
223116_at	16q22-q23	BCAR1	breast cancer anti-estrogen resistance 1	0.00434087	0	upregulated	0
223125_s_at	1q25	C1orf21	chromosome 1 open reading frame 21	0.0112204	0	0	downregulated
223130_s_at	6p23-p22.3	MYLIP	myosin regulatory light chain interacting protein	0.000151129	0	downregulated	downregulated
223159_s_at	9q33.3-q34.11	NEK6	NIMA (never in mitosis gene a)-related kinase 6	0.00816085	0	0	upregulated
223179_at	16p11.2	YPEL3	yippee-like 3 (Drosophila)	0.00130149	0	0	downregulated
223195_s_at	1p35.3	SESN2	sestrin 2	0.000563016	0	0	upregulated
223196_s_at	1p35.3	SESN2	sestrin 2	0.00082767	0	0	upregulated
223218_s_at	3p12-q12	NFKBIZ	nuclear factor of kappa light polypeptide gene enhancer in B-cells inhibitor, zeta	0.00156059	0	0	downregulated
223220_s_at	3q13-q21	PARP9	poly (ADP-ribose) polymerase family, member 9	0.00479939	0	downregulated	downregulated
223268_at	11q21	C11orf54	chromosome 11 open reading frame 54	0.0121916	0	0	downregulated
223276_at	5q33.1	MST150	MSTP150	7.60086e-05	0	downregulated	downregulated
223302_s_at	7q22.1	ZNF655	zinc finger protein 655	0.00359748	0	upregulated	upregulated
223315_at	12q22	NTN4	netrin 4	0.0109572	0	0	upregulated
223333_s_at	19p13.3	ANGPTL4	angiopoietin-like 4	1.76294e-05	0	upregulated	upregulated
223349_s_at	2q37.3	BOK	BCL2-related ovarian killer	0.0252501	0	0	upregulated
223351_at	17q25.1	C17orf80	chromosome 17 open reading frame 80	0.0108422	0	downregulated	0
223364_s_at	12q24.31	DHX37	DEAH (Asp-Glu-Ala-His) box polypeptide 37	0.0164787	0	upregulated	upregulated
223365_at	12q24.31	DHX37	DEAH (Asp-Glu-Ala-His) box polypeptide 37	0.0038249	0	upregulated	upregulated
223403_s_at	2q13	POLR1B	polymerase (RNA) I polypeptide B, 128kDa	0.00564453	0	0	upregulated
223404_s_at	1q25.2	C1orf25	chromosome 1 open reading frame 25	0.0271472	0	downregulated	0
223412_at	13q14.11	KBTBD7	kelch repeat and BTB (POZ) domain containing 7	0.00148981	0	downregulated	0
223422_s_at	4q21.23-q21.3	ARHGAP24	Rho GTPase activating protein 24	0.00135852	0	0	downregulated
223437_at	22q12-q13.1	PPARA	peroxisome proliferator-activated receptor alpha	0.0197935	0	0	downregulated
223460_at	17p13.2	CAMKK1	calcium/calmodulin-dependent protein kinase kinase 1, alpha	0.00705031	0	upregulated	0
223494_at	10q24.1-q24.3	MGEA5	meningioma expressed antigen 5 (hyaluronidase)	0.02763	0	0	upregulated
223518_at	1p36.3-p36.2	DFFA	DNA fragmentation factor, 45kDa, alpha polypeptide	0.00426148	0	0	upregulated
223599_at	11p15.4	TRIM6	tripartite motif-containing 6	0.0259688	0	0	downregulated
223690_at	14q24	LTBP2	latent transforming growth factor beta binding protein 2	0.0264909	0	0	upregulated
223734_at	4q31.1	C4orf49	chromosome 4 open reading frame 49	0.0138254	0	0	downregulated
223774_at	1p35.3	SNHG12	small nucleolar RNA host gene 12 (non-protein coding)	0.00429086	0	upregulated	upregulated
223792_at	2q11.2	ZNF2	zinc finger protein 2	0.00411523	0	upregulated	upregulated
223800_s_at	2q14-q21	LIMS3	LIM and senescent cell antigen-like domains 3	8.04037e-05	0	upregulated	0
223932_at	NA	NA	NA	0.0030394	0	downregulated	0
224164_at	1q21.2	TPM3	tropomyosin 3	0.0010921	0	upregulated	upregulated
224219_s_at	13q13.1-q13.2	TRPC4	transient receptor potential cation channel, subfamily C, member 4	0.000268729	0	upregulated	upregulated
224220_x_at	13q13.1-q13.2	TRPC4	transient receptor potential cation channel, subfamily C, member 4	0.000520967	0	upregulated	upregulated
224365_s_at	16p13.3	TIGD7	tigger transposable element derived 7	0.0201614	0	downregulated	0
224454_at	12p12.1	ETNK1	ethanolamine kinase 1	9.62435e-05	0	upregulated	0
224463_s_at	11q22.1	C11orf70	chromosome 11 open reading frame 70	0.0177969	0	0	downregulated
224492_s_at	19p13.2	ZNF627	zinc finger protein 627	0.00163724	0	0	upregulated
224521_s_at	12p13.33	CCDC77	coiled-coil domain containing 77	0.00159379	0	downregulated	0
224570_s_at	1q42.3	IRF2BP2	interferon regulatory factor 2 binding protein 2	0.0255294	0	upregulated	0
224572_s_at	1q42.3	IRF2BP2	interferon regulatory factor 2 binding protein 2	0.0313934	0	upregulated	0
224606_at	10p15	KLF6	Kruppel-like factor 6	2.67851e-05	0	downregulated	downregulated
224634_at	1q22	GPATCH4	G patch domain containing 4	0.00127733	0	0	upregulated
224657_at	1p36	ERRFI1	ERBB receptor feedback inhibitor 1	1.96037e-06	0	0	downregulated
224694_at	2p13.1	ANTXR1	anthrax toxin receptor 1	0.0104529	0	0	upregulated
224790_at	8q24.1-q24.2	ASAP1	ArfGAP with SH3 domain, ankyrin repeat and PH domain 1	0.0344197	0	upregulated	0
224797_at	5q14.3	ARRDC3	arrestin domain containing 3	0.00132087	0	0	upregulated
224822_at	8p22	DLC1	deleted in liver cancer 1	8.18703e-05	0	upregulated	0
224833_at	11q23.3	ETS1	v-ets erythroblastosis virus E26 oncogene homolog 1 (avian)	0.00617901	0	upregulated	0
224835_at	20p12.3	RP5-1022P6.2	hypothetical protein KIAA1434	0.0361471	0	0	upregulated
224873_s_at	3p25	MRPS25	mitochondrial ribosomal protein S25	0.0194731	0	0	upregulated
224917_at	17q23.1	TMEM49	transmembrane protein 49	3.39571e-05	upregulated	upregulated	0
224920_x_at	19q13.41	MYADM	myeloid-associated differentiation marker	0.0240375	0	upregulated	0
224940_s_at	9q33.2	PAPPA	pregnancy-associated plasma protein A, pappalysin 1	0.000336876	0	upregulated	upregulated
224941_at	9q33.2	PAPPA	pregnancy-associated plasma protein A, pappalysin 1	0.000232343	0	upregulated	upregulated
224942_at	9q33.2	PAPPA	pregnancy-associated plasma protein A, pappalysin 1	0.000771201	0	upregulated	upregulated
224964_s_at	14q21	GNG2	guanine nucleotide binding protein (G protein), gamma 2	0.00308404	0	downregulated	downregulated
224978_s_at	17q25.3	USP36	ubiquitin specific peptidase 36	0.000317471	0	upregulated	upregulated
225018_at	18p11.21	SPIRE1	spire homolog 1 (Drosophila)	0.00144833	0	upregulated	upregulated
225021_at	18q21.32	ZNF532	zinc finger protein 532	0.00793715	0	0	upregulated
225042_s_at	12q13.11-q13.12	CSRNP2	cysteine-serine-rich nuclear protein 2	0.0305242	0	0	upregulated
225120_at	7p13	PURB	purine-rich element binding protein B	0.00833741	0	upregulated	downregulated
225186_at	2q33	RAPH1	Ras association (RalGDS/AF-6) and pleckstrin homology domains 1	0.0413957	0	upregulated	0
225188_at	2q33	RAPH1	Ras association (RalGDS/AF-6) and pleckstrin homology domains 1	0.0189807	0	upregulated	0
225207_at	7q21.3	PDK4	pyruvate dehydrogenase kinase, isozyme 4	2.14193e-07	upregulated	upregulated	upregulated
225220_at	4q26	SNHG8	small nucleolar RNA host gene 8 (non-protein coding)	0.00426023	0	0	upregulated
225225_at	15q15.1	LOC729082	hypothetical protein LOC729082	0.00534921	0	downregulated	0
225262_at	2p23.3	FOSL2	FOS-like antigen 2	0.000354416	0	upregulated	downregulated
225283_at	15q26.3	ARRDC4	arrestin domain containing 4	9.52464e-05	0	downregulated	0
225301_s_at	18q21	MYO5B	myosin VB	0.0114325	0	upregulated	upregulated
225316_at	1p34.2	MFSD2	major facilitator superfamily domain containing 2	0.0028713	0	upregulated	0
225321_s_at	7q22.1	PILRB	paired immunoglobin-like type 2 receptor beta	0.00286442	0	0	upregulated
225328_at	NA	NA	NA	0.00197008	0	upregulated	upregulated
225332_at	15q15.1	LOC729082	hypothetical protein LOC729082	0.0133624	0	downregulated	0
225346_at	12q24.1	MTERFD3	MTERF domain containing 3	0.0311737	0	downregulated	0
225372_at	10q22.1	C10orf54	chromosome 10 open reading frame 54	0.000478662	0	upregulated	0
225380_at	2p21	SGK493	protein kinase-like protein SgK493	0.00517333	0	upregulated	upregulated
225390_s_at	15q12	KLF13	Kruppel-like factor 13	0.00852706	0	upregulated	0
225432_s_at	20p11.23	CSRP2BP	CSRP2 binding protein	0.0026407	0	downregulated	upregulated
225436_at	15q25.1	FAM108C1	family with sequence similarity 108, member C1	0.0141191	0	upregulated	0
225474_at	3p14.1	MAGI1	membrane associated guanylate kinase, WW and PDZ domain containing 1	0.00204585	0	upregulated	upregulated
225520_at	6q25.1	MTHFD1L	methylenetetrahydrofolate dehydrogenase (NADP+ dependent) 1-like	0.000225365	0	upregulated	upregulated
225521_at	12q24.11	ANAPC7	anaphase promoting complex subunit 7	0.0114325	0	0	upregulated
225544_at	12q24.1	TBX3	T-box 3	0.016506	0	upregulated	0
225557_at	3p22	AXUD1	AXIN1 up-regulated 1	0.000685362	0	0	downregulated
225582_at	10q25.1	ITPRIP	inositol 1,4,5-triphosphate receptor interacting protein	0.00322278	0	upregulated	downregulated
225589_at	4q32.3-q33	SH3RF1	SH3 domain containing ring finger 1	0.00168147	0	upregulated	0
225590_at	4q32.3-q33	SH3RF1	SH3 domain containing ring finger 1	0.00587014	0	upregulated	0
225606_at	2q13	BCL2L11	BCL2-like 11 (apoptosis facilitator)	0.0157439	0	0	upregulated
225610_at	9p24.1	UHRF2	ubiquitin-like with PHD and ring finger domains 2	0.0107339	0	downregulated	0
225615_at	1p36.13	IFFO2	intermediate filament family orphan 2	0.00793759	0	upregulated	0
225663_at	10p12.1	ACBD5	acyl-Coenzyme A binding domain containing 5	0.0443007	0	downregulated	0
225685_at	NA	NA	NA	0.000102089	0	upregulated	downregulated
225688_s_at	3q13.2	PHLDB2	pleckstrin homology-like domain, family B, member 2	0.0090936	0	upregulated	0
225699_at	7p13	C7orf40	chromosome 7 open reading frame 40	0.00104434	0	upregulated	upregulated
225706_at	7p21.3	GLCCI1	glucocorticoid induced transcript 1	0.0087096	0	downregulated	0
225712_at	5q33.2	GEMIN5	gem (nuclear organelle) associated protein 5	0.00548359	0	0	upregulated
225720_at	4q26	SYNPO2	synaptopodin 2	0.000558561	0	upregulated	0
225722_at	NA	NA	NA	0.012635	0	upregulated	upregulated
225753_at	2p23.3	ZNF513	zinc finger protein 513	0.0094163	0	0	upregulated
225755_at	3p21.31	KLHDC8B	kelch domain containing 8B	0.00802502	0	downregulated	downregulated
225799_at	2q13	LOC541471	hypothetical LOC541471	0.00257569	0	upregulated	0
225803_at	8q24.13	FBXO32	F-box protein 32	0.000117451	0	upregulated	upregulated
225806_at	14q11.2	JUB	jub, ajuba homolog (Xenopus laevis)	0.00510989	0	upregulated	upregulated
225807_at	14q11.2	JUB	jub, ajuba homolog (Xenopus laevis)	2.67851e-05	0	upregulated	upregulated
225842_at	12q15	PHLDA1	pleckstrin homology-like domain, family A, member 1	0.00283118	upregulated	upregulated	downregulated
225857_s_at	20q11.23	LOC388796	hypothetical LOC388796	0.00257569	0	upregulated	upregulated
225895_at	4q26	SYNPO2	synaptopodin 2	0.000104942	0	0	downregulated
225912_at	8q22	TP53INP1	tumor protein p53 inducible nuclear protein 1	5.54135e-05	0	downregulated	0
225917_at	NA	NA	NA	0.00541013	0	downregulated	downregulated
225950_at	NA	NA	NA	0.0255856	0	0	downregulated
225955_at	NA	LOC653506	similar to meteorin, glial cell differentiation regulator-like	0.00499364	0	upregulated	0
225978_at	12p13.31	RIMKLB	ribosomal modification protein rimK-like family member B	0.00522368	0	0	upregulated
225992_at	10p12	MLLT10	myeloid/lymphoid or mixed-lineage leukemia (trithorax homolog, Drosophila); translocated to, 10	0.000399101	0	downregulated	0
226021_at	8q21.11	RDH10	retinol dehydrogenase 10 (all-trans)	0.000287328	0	upregulated	upregulated
226028_at	11q24.2	ROBO4	roundabout homolog 4, magic roundabout (Drosophila)	0.0405071	0	upregulated	0
226034_at	NA	NA	NA	0.00897796	upregulated	upregulated	0
226041_at	7q22.1	NAPEPLD	N-acyl phosphatidylethanolamine phospholipase D	0.000792017	0	downregulated	0
226065_at	12q12	PRICKLE1	prickle homolog 1 (Drosophila)	0.00127221	0	upregulated	0
226069_at	12q12	PRICKLE1	prickle homolog 1 (Drosophila)	0.00538379	0	upregulated	0
226093_at	12p13.33	DCP1B	DCP1 decapping enzyme homolog B (S. cerevisiae)	0.015179	0	downregulated	0
226099_at	5q15	ELL2	elongation factor, RNA polymerase II, 2	0.000190989	0	upregulated	0
226114_at	1p36	ZNF436	zinc finger protein 436	0.00628421	0	0	upregulated
226124_at	16q22.1	ZFP90	zinc finger protein 90 homolog (mouse)	0.0067717	0	downregulated	0
226126_at	4q24	TBCKL	TBC domain-containing protein kinase-like	0.0323492	0	0	downregulated
226135_at	6p21	UHRF1BP1	UHRF1 binding protein 1	0.0357343	0	0	upregulated
226140_s_at	10p12.2	OTUD1	OTU domain containing 1	2.38982e-05	0	upregulated	upregulated
226202_at	7q36.1	ZNF398	zinc finger protein 398	0.0272443	0	upregulated	0
226206_at	7p22.3	MAFK	v-maf musculoaponeurotic fibrosarcoma oncogene homolog K (avian)	7.17524e-05	0	upregulated	0
226208_at	5q12.1	ZSWIM6	zinc finger, SWIM-type containing 6	0.00090326	0	upregulated	downregulated
226213_at	12q13	ERBB3	v-erb-b2 erythroblastic leukemia viral oncogene homolog 3 (avian)	7.56739e-05	0	0	downregulated
226218_at	5p13	IL7R	interleukin 7 receptor	8.59584e-05	0	upregulated	upregulated
226231_at	NA	NA	NA	0.0263397	0	0	upregulated
226262_at	NA	NA	NA	0.0125201	0	upregulated	upregulated
226267_at	14q24.3	JDP2	Jun dimerization protein 2	0.00168147	0	0	upregulated
226271_at	8q21.11	GDAP1	ganglioside-induced differentiation-associated protein 1	0.0263379	0	0	upregulated
226284_at	6q25.1	ZBTB2	zinc finger and BTB domain containing 2	0.00117505	0	upregulated	upregulated
226295_at	12p13.33	ITFG2	integrin alpha FG-GAP repeat containing 2	0.00356513	0	0	upregulated
226302_at	18q21-q22	ATP8B1	ATPase, class I, type 8B, member 1	0.000602756	0	upregulated	0
226311_at	NA	NA	NA	0.00867464	0	upregulated	upregulated
226338_at	8q21.3	TMEM55A	transmembrane protein 55A	0.00942023	0	downregulated	downregulated
226342_at	2p21	SPTBN1	spectrin, beta, non-erythrocytic 1	0.00205519	0	upregulated	upregulated
226370_at	Xp22.1-p21	KLHL15	kelch-like 15 (Drosophila)	0.0223107	0	downregulated	0
226431_at	2q33.1	FAM117B	family with sequence similarity 117, member B	0.0136012	0	downregulated	downregulated
226444_at	NA	NA	NA	2.31878e-05	0	upregulated	upregulated
226479_at	13q14.11	KBTBD6	kelch repeat and BTB (POZ) domain containing 6	0.0275299	0	0	upregulated
226552_at	9q34.11	IER5L	immediate early response 5-like	0.000133247	0	upregulated	upregulated
226559_at	9q34.11	IER5L	immediate early response 5-like	0.000307771	0	upregulated	upregulated
226574_at	13q12.11	PSPC1	paraspeckle component 1	0.0217949	0	0	upregulated
226636_at	3q26	PLD1	phospholipase D1, phosphatidylcholine-specific	0.00874769	0	0	downregulated
226641_at	NA	NA	NA	0.0109531	0	downregulated	downregulated
226649_at	10q23.31	PANK1	pantothenate kinase 1	0.00156807	0	downregulated	upregulated
226666_at	14q23.1	DAAM1	dishevelled associated activator of morphogenesis 1	0.00143536	0	0	downregulated
226677_at	18q11.2	ZNF521	zinc finger protein 521	0.000177713	0	0	upregulated
226683_at	5q11.2	SNX18	sorting nexin 18	0.000602756	0	0	downregulated
226693_at	3q29	SDHALP1	succinate dehydrogenase complex, subunit A, flavoprotein pseudogene 1	0.000808415	0	upregulated	upregulated
226695_at	1q24	PRRX1	paired related homeobox 1	0.0174093	0	0	downregulated
226750_at	4q28.2	LARP2	La ribonucleoprotein domain family, member 2	0.000247531	0	upregulated	upregulated
226756_at	NA	NA	NA	6.28783e-05	0	0	downregulated
226757_at	10q23-q25	IFIT2	interferon-induced protein with tetratricopeptide repeats 2	0.0128677	0	0	downregulated
226770_at	1p12-p11.2	MAGI3	membrane associated guanylate kinase, WW and PDZ domain containing 3	0.0263274	0	downregulated	0
226773_at	NA	NA	NA	7.58943e-05	0	downregulated	downregulated
226775_at	8q23.1	ENY2	enhancer of yellow 2 homolog (Drosophila)	0.00646539	0	0	upregulated
226808_at	7q36.1	ZNF862	zinc finger protein 862	0.00100127	0	0	upregulated
226847_at	5q11.2	FST	follistatin	3.65599e-06	0	upregulated	upregulated
226848_at	NA	NA	NA	0.034605	0	0	upregulated
226858_at	22q13.1	CSNK1E	casein kinase 1, epsilon	0.00268201	0	upregulated	upregulated
226876_at	17p13	FAM101B	family with sequence similarity 101, member B	0.00190965	0	0	upregulated
226893_at	1q24-q25	ABL2	v-abl Abelson murine leukemia viral oncogene homolog 2 (arg, Abelson-related gene)	0.00202013	0	0	downregulated
226905_at	17p13	FAM101B	family with sequence similarity 101, member B	0.0227747	0	0	upregulated
226908_at	12q14.1	LRIG3	leucine-rich repeats and immunoglobulin-like domains 3	0.0237628	0	upregulated	0
226938_at	14q24.3	WDR21A	WD repeat domain 21A	0.00489013	0	upregulated	upregulated
226939_at	4p15.33	CPEB2	cytoplasmic polyadenylation element binding protein 2	0.00532382	0	upregulated	upregulated
226978_at	22q12-q13.1	PPARA	peroxisome proliferator-activated receptor alpha	0.0488949	0	0	downregulated
226980_at	5q12.1	DEPDC1B	DEP domain containing 1B	0.0151464	0	downregulated	downregulated
226991_at	20q13.2-q13.3	NFATC2	nuclear factor of activated T-cells, cytoplasmic, calcineurin-dependent 2	0.000481113	0	upregulated	upregulated
227020_at	17q22	YPEL2	yippee-like 2 (Drosophila)	0.0090388	0	downregulated	downregulated
227034_at	2q13	ANKRD57	ankyrin repeat domain 57	0.00338764	0	0	downregulated
227037_at	17p11.2	PLD6	phospholipase D family, member 6	0.00407397	0	upregulated	0
227040_at	13q13.3	NHLRC3	NHL repeat containing 3	0.0021919	0	downregulated	0
227048_at	18p11.31	LAMA1	laminin, alpha 1	0.0242014	0	0	upregulated
227058_at	13q12.3	C13orf33	chromosome 13 open reading frame 33	0.00243951	0	upregulated	upregulated
227080_at	1p12	ZNF697	zinc finger protein 697	0.000174529	0	upregulated	upregulated
227093_at	17q25.3	USP36	ubiquitin specific peptidase 36	0.00291875	0	upregulated	upregulated
227099_s_at	11p11.2	LOC387763	hypothetical protein LOC387763	0.000287563	0	upregulated	upregulated
227112_at	3q21.3	TMCC1	transmembrane and coiled-coil domain family 1	3.78921e-05	0	downregulated	0
227140_at	NA	NA	NA	0.000481894	0	upregulated	0
227179_at	8q13-q21.1	STAU2	staufen, RNA binding protein, homolog 2 (Drosophila)	0.00228818	0	0	downregulated
227188_at	21q22.11	C21orf63	chromosome 21 open reading frame 63	0.0019124	0	upregulated	0
227210_at	NA	NA	NA	0.0369311	0	upregulated	0
227243_s_at	10q26.3	EBF3	early B-cell factor 3	0.00420501	0	upregulated	upregulated
227333_at	NA	NA	NA	0.00131	0	0	downregulated
227337_at	4q35.1	ANKRD37	ankyrin repeat domain 37	0.000414626	0	upregulated	0
227339_at	5q21.1	RGMB	RGM domain family, member B	0.00688316	0	upregulated	0
227345_at	8p21	TNFRSF10D	tumor necrosis factor receptor superfamily, member 10d, decoy with truncated death domain	0.0139771	0	0	downregulated
227347_x_at	1p36.33	HES4	hairy and enhancer of split 4 (Drosophila)	0.0311168	0	upregulated	upregulated
227348_at	1p32.2	PARS2	prolyl-tRNA synthetase 2, mitochondrial (putative)	0.00021673	0	0	upregulated
227405_s_at	10p11.21	FZD8	frizzled homolog 8 (Drosophila)	0.015942	0	upregulated	0
227411_at	19q13.11	WTIP	Wilms tumor 1 interacting protein	0.0153051	0	upregulated	upregulated
227420_at	19p13.3	TNFAIP8L1	tumor necrosis factor, alpha-induced protein 8-like 1	0.00688316	0	0	downregulated
227443_at	9p23	C9orf150	chromosome 9 open reading frame 150	0.000269776	0	upregulated	upregulated
227452_at	NA	NA	NA	2.15223e-05	0	upregulated	upregulated
227458_at	NA	NA	NA	0.000215057	0	0	downregulated
227467_at	8q21.11	RDH10	retinol dehydrogenase 10 (all-trans)	0.000409365	0	upregulated	upregulated
227491_at	4q25	ELOVL6	ELOVL family member 6, elongation of long chain fatty acids (FEN1/Elo2, SUR4/Elo3-like, yeast)	0.0283545	0	0	downregulated
227506_at	10q21.1	SLC16A9	solute carrier family 16, member 9 (monocarboxylic acid transporter 9)	0.00909824	0	0	upregulated
227517_s_at	1q25.1	CENPL	centromere protein L	0.00118923	0	0	upregulated
227525_at	7p21.3	GLCCI1	glucocorticoid induced transcript 1	0.00470802	0	downregulated	0
227529_s_at	6q24-q25	AKAP12	A kinase (PRKA) anchor protein 12	0.00112663	0	upregulated	upregulated
227530_at	6q24-q25	AKAP12	A kinase (PRKA) anchor protein 12	0.00622875	0	upregulated	upregulated
227599_at	3q29	C3orf59	chromosome 3 open reading frame 59	3.23494e-05	0	upregulated	downregulated
227617_at	1p36.22	TMEM201	transmembrane protein 201	0.00301399	0	upregulated	upregulated
227633_at	7q36	RHEB	Ras homolog enriched in brain	0.00927982	0	upregulated	upregulated
227650_at	10p13	HSPA14	heat shock 70kDa protein 14	0.00429086	0	upregulated	0
227660_at	2p13.1	ANTXR1	anthrax toxin receptor 1	0.000235627	0	upregulated	upregulated
227689_at	NA	ZNF227	zinc finger protein 227	0.0121916	0	downregulated	0
227694_at	1p36.11	C1orf201	chromosome 1 open reading frame 201	0.00617489	0	downregulated	downregulated
227697_at	17q25.3	SOCS3	suppressor of cytokine signaling 3	0.000108382	0	upregulated	upregulated
227699_at	14q23.1	C14orf149	chromosome 14 open reading frame 149	0.00407397	0	upregulated	upregulated
227703_s_at	Xq21.33	SYTL4	synaptotagmin-like 4	0.0423433	0	0	downregulated
227731_at	3q21	CNBP	CCHC-type zinc finger, nucleic acid binding protein	0.0269739	0	upregulated	upregulated
227732_at	7q22.2	ATXN7L1	ataxin 7-like 1	0.00519823	0	downregulated	0
227748_at	1p22.2	CCBL2	cysteine conjugate-beta lyase 2	0.00342238	0	downregulated	downregulated
227752_at	20p12.1	SPTLC3	serine palmitoyltransferase, long chain base subunit 3	0.0124841	0	0	downregulated
227755_at	NA	NA	NA	0.00852706	0	0	upregulated
227757_at	13q34	CUL4A	cullin 4A	0.00762146	0	upregulated	upregulated
227759_at	1p32.3	PCSK9	proprotein convertase subtilisin/kexin type 9	4.95625e-06	0	upregulated	upregulated
227763_at	2q23.2	LYPD6	LY6/PLAUR domain containing 6	0.00330013	0	0	upregulated
227764_at	2q23.2	LYPD6	LY6/PLAUR domain containing 6	0.0266246	0	0	upregulated
227791_at	3q24	SLC9A9	solute carrier family 9 (sodium/hydrogen exchanger), member 9	0.00717321	0	0	downregulated
227793_at	NA	NA	NA	0.00195802	0	downregulated	downregulated
227812_at	13q12.11-q12.3	TNFRSF19	tumor necrosis factor receptor superfamily, member 19	0.0139771	0	0	upregulated
227828_s_at	2p12	FAM176A	family with sequence similarity 176, member A	0.00208716	0	upregulated	0
227839_at	2q23.1	MBD5	methyl-CpG binding domain protein 5	4.95625e-06	0	upregulated	downregulated
227846_at	15q14-q15.1	GPR176	G protein-coupled receptor 176	0.00204483	0	upregulated	upregulated
227859_at	2p23.3	DNAJC27	DnaJ (Hsp40) homolog, subfamily C, member 27	0.0140415	0	downregulated	0
227900_at	3q13.11	CBLB	Cas-Br-M (murine) ecotropic retroviral transforming sequence b	0.000528732	0	upregulated	upregulated
227920_at	6q21	BEND3	BEN domain containing 3	0.000291015	0	upregulated	upregulated
227930_at	1p34.3	EIF2C4	eukaryotic translation initiation factor 2C, 4	0.00611263	0	downregulated	0
227936_at	8q12.1	TMEM68	transmembrane protein 68	0.000370741	0	upregulated	0
228002_at	10p15.3	IDI2	isopentenyl-diphosphate delta isomerase 2	0.000493729	0	upregulated	0
228033_at	12q21.2	E2F7	E2F transcription factor 7	0.00611263	0	0	upregulated
228037_at	NA	NA	NA	0.000938401	0	0	downregulated
228072_at	11q13.1	SYT12	synaptotagmin XII	0.000643428	0	0	upregulated
228080_at	11q23.1	LAYN	layilin	0.0067167	0	upregulated	0
228081_at	4q21.1	CCNG2	cyclin G2	0.000328128	0	downregulated	downregulated
228098_s_at	6p23-p22.3	MYLIP	myosin regulatory light chain interacting protein	6.26191e-06	downregulated	downregulated	downregulated
228099_at	19q13.43	ZNF550	zinc finger protein 550	0.0028713	0	0	upregulated
228121_at	1q41	TGFB2	transforming growth factor, beta 2	2.27962e-05	0	upregulated	upregulated
228128_x_at	9q33.2	PAPPA	pregnancy-associated plasma protein A, pappalysin 1	0.000138544	0	upregulated	upregulated
228145_s_at	7q36.1	ZNF398	zinc finger protein 398	0.0382907	0	upregulated	0
228176_at	9q22.1	C9orf47	chromosome 9 open reading frame 47	0.00609602	0	upregulated	upregulated
228181_at	1q32-q41	SLC30A1	solute carrier family 30 (zinc transporter), member 1	3.2249e-06	0	upregulated	upregulated
228188_at	2p23.3	FOSL2	FOS-like antigen 2	0.000792017	0	upregulated	0
228229_at	19q13.2	ZNF526	zinc finger protein 526	0.0238893	0	upregulated	upregulated
228235_at	Xq26.3	MGC16121	hypothetical protein MGC16121	0.000199257	0	upregulated	upregulated
228238_at	1q25.1	CENPL	centromere protein L	0.00193104	0	0	upregulated
228284_at	9q21.32	TLE1	transducin-like enhancer of split 1 (E(sp1) homolog, Drosophila)	0.0028713	0	upregulated	0
228325_at	8q11.21	KIAA0146	KIAA0146	5.36857e-07	upregulated	upregulated	upregulated
228336_at	5q33.3	PWWP2A	PWWP domain containing 2A	0.0061032	0	downregulated	0
228346_at	19p13.2	ZNF844	zinc finger protein 844	0.000165081	0	0	upregulated
228367_at	18q21.31-q21.32	ALPK2	alpha-kinase 2	1.46939e-06	0	upregulated	upregulated
228368_at	11q22.3-q23.1	ARHGAP20	Rho GTPase activating protein 20	3.74744e-06	0	upregulated	0
228442_at	NA	NA	NA	0.0138458	0	0	upregulated
228450_at	11p15.1	PLEKHA7	pleckstrin homology domain containing, family A member 7	0.000208972	0	upregulated	upregulated
228455_at	1p13	RBM15	RNA binding motif protein 15	0.000472129	0	0	upregulated
228490_at	15q26.1	ABHD2	abhydrolase domain containing 2	0.00470802	0	0	upregulated
228496_s_at	2p21	CRIM1	cysteine rich transmembrane BMP regulator 1 (chordin-like)	0.00296485	0	upregulated	upregulated
228499_at	3p22-p21	PFKFB4	6-phosphofructo-2-kinase/fructose-2,6-biphosphatase 4	0.000793639	0	downregulated	downregulated
228539_at	NA	NA	NA	0.0348874	0	downregulated	0
228570_at	12q23.3	BTBD11	BTB (POZ) domain containing 11	0.000110788	0	0	downregulated
228635_at	4q28.3	PCDH10	protocadherin 10	0.00175436	0	upregulated	upregulated
228667_at	6q26	AGPAT4	1-acylglycerol-3-phosphate O-acyltransferase 4 (lysophosphatidic acid acyltransferase, delta)	0.0115299	0	0	downregulated
228676_at	11q13.2	ORAOV1	oral cancer overexpressed 1	0.00682772	0	upregulated	upregulated
228723_at	NA	NA	NA	0.000839594	0	downregulated	downregulated
228759_at	7q34	CREB3L2	cAMP responsive element binding protein 3-like 2	0.0217175	0	upregulated	upregulated
228762_at	7p22.2	LFNG	LFNG O-fucosylpeptide 3-beta-N-acetylglucosaminyltransferase	0.000889179	0	upregulated	0
228785_at	1q32.1	ZNF281	zinc finger protein 281	0.00021673	0	downregulated	downregulated
228809_at	Xq28	CXorf40A	chromosome X open reading frame 40A	0.0135644	0	0	upregulated
228821_at	2q11.2-q12.1	ST6GAL2	ST6 beta-galactosamide alpha-2,6-sialyltranferase 2	9.94641e-07	0	upregulated	upregulated
228840_at	11q14.3	AMOTL1	angiomotin like 1	0.030155	0	upregulated	0
228843_at	NA	NA	NA	0.00930497	0	0	upregulated
228850_s_at	4p15.2	SLIT2	slit homolog 2 (Drosophila)	0.0441214	0	0	upregulated
228890_at	2p11.2	ATOH8	atonal homolog 8 (Drosophila)	0.00371739	0	upregulated	0
228894_at	9q34.11	LOC253842	hypothetical protein LOC253842	0.0166995	0	downregulated	0
228904_at	17q21.3	HOXB3	homeobox B3	0.0119093	0	0	downregulated
229001_at	14q11.2	PPP1R3E	protein phosphatase 1, regulatory (inhibitor) subunit 3E	0.00772815	0	0	upregulated
229004_at	NA	NA	NA	0.000764598	upregulated	upregulated	upregulated
229026_at	5q31.1	CDC42SE2	CDC42 small effector 2	0.0361506	0	downregulated	0
229074_at	NA	NA	NA	0.0290336	0	upregulated	upregulated
229092_at	15q26	NR2F2	nuclear receptor subfamily 2, group F, member 2	0.000346388	0	upregulated	0
229111_at	NA	NA	NA	0.00157263	0	downregulated	downregulated
229139_at	8q21	JPH1	junctophilin 1	7.90799e-05	0	upregulated	upregulated
229218_at	7q22.1	COL1A2	collagen, type I, alpha 2	0.0412524	0	0	upregulated
229221_at	11p13	CD44	CD44 molecule (Indian blood group)	0.000399034	0	upregulated	upregulated
229228_at	7p15.1	CREB5	cAMP responsive element binding protein 5	0.000397157	0	upregulated	upregulated
229238_at	17p13.3	C17orf97	chromosome 17 open reading frame 97	0.00609602	0	0	upregulated
229242_at	NA	NA	NA	0.0474024	0	upregulated	0
229243_at	NA	NA	NA	0.000108382	0	0	upregulated
229310_at	2p24.1	KLHL29	kelch-like 29 (Drosophila)	0.00970537	0	upregulated	upregulated
229323_at	10q26.3	LOC387723	similar to hCG1648656	0.00584277	0	0	upregulated
229349_at	6q21	LIN28B	lin-28 homolog B (C. elegans)	0.0393029	0	downregulated	downregulated
229360_at	22q11.22	ZNF280B	zinc finger protein 280B	0.0110778	0	downregulated	0
229371_at	NA	NA	NA	0.000203642	0	upregulated	0
229378_at	10q21.3	STOX1	storkhead box 1	0.00611263	0	downregulated	0
229426_at	15q24.1	COX5A	cytochrome c oxidase subunit Va	0.0187118	0	0	upregulated
229428_at	10q11.21	LOC100133130	PRO1102	0.000128212	0	upregulated	upregulated
229450_at	10q24	IFIT3	interferon-induced protein with tetratricopeptide repeats 3	0.034188	0	0	downregulated
229518_at	1p36.11	FAM46B	family with sequence similarity 46, member B	0.000103458	0	downregulated	downregulated
229521_at	7q22.3	FLJ36031	hypothetical protein FLJ36031	0.000248836	0	0	downregulated
229545_at	20p12.3	FERMT1	fermitin family homolog 1 (Drosophila)	0.0393029	0	0	upregulated
229572_at	NA	NA	NA	0.00438913	0	upregulated	upregulated
229576_s_at	12q24.1	TBX3	T-box 3	0.00638973	0	upregulated	0
229587_at	19q12	UBA2	ubiquitin-like modifier activating enzyme 2	0.0132401	0	upregulated	0
229715_at	NA	NA	NA	0.000174031	0	upregulated	upregulated
229720_at	9p12	BAG1	BCL2-associated athanogene	0.00628421	0	0	upregulated
229794_at	19q13.12	ZNF585A	zinc finger protein 585A	0.0152831	0	downregulated	0
229795_at	NA	NA	NA	0.000788269	0	upregulated	upregulated
229830_at	7p22	PDGFA	platelet-derived growth factor alpha polypeptide	0.0118238	0	0	upregulated
229865_at	3q26.31	FNDC3B	fibronectin type III domain containing 3B	0.00116551	0	upregulated	upregulated
229879_at	NA	NA	NA	0.00523835	0	upregulated	0
229892_at	12q24.33	EP400NL	EP400 N-terminal like	0.0252832	0	upregulated	0
229899_s_at	20q13.13	C20orf199	chromosome 20 open reading frame 199	0.00714242	0	0	upregulated
229949_at	NA	NA	NA	0.0337502	0	0	upregulated
229981_at	20p11	SNX5	sorting nexin 5	0.00260922	0	downregulated	downregulated
229983_at	4q22.1	TIGD2	tigger transposable element derived 2	0.00333827	0	downregulated	0
230002_at	1p13.3	CLCC1	chloride channel CLIC-like 1	0.00204585	0	downregulated	downregulated
230031_at	9q33-q34.1	HSPA5	heat shock 70kDa protein 5 (glucose-regulated protein, 78kDa)	0.00327268	0	upregulated	upregulated
230048_at	NA	NA	NA	0.000557069	0	upregulated	0
230063_at	19q13.4	ZNF264	zinc finger protein 264	0.0142317	0	downregulated	0
230082_at	NA	LOC100133660	hypothetical LOC100133660	1.76294e-05	0	upregulated	0
230097_at	21q22.1	GART	phosphoribosylglycinamide formyltransferase, phosphoribosylglycinamide synthetase, phosphoribosylaminoimidazole synthetase	0.00300338	0	0	upregulated
230121_at	1q32.2	C1orf133	chromosome 1 open reading frame 133	0.0282582	0	upregulated	0
230127_at	NA	NA	NA	0.00617489	0	0	downregulated
230133_at	9q34	RC3H2	ring finger and CCCH-type zinc finger domains 2	0.00847379	0	0	upregulated
230179_at	6p23	LOC285812	hypothetical protein LOC285812	0.00125333	0	upregulated	upregulated
230183_at	8q24.11-q24.13	EXT1	exostoses (multiple) 1	0.000232343	0	upregulated	upregulated
230218_at	17p13.3	HIC1	hypermethylated in cancer 1	0.037621	0	upregulated	0
230256_at	1q22	C1orf104	chromosome 1 open reading frame 104	7.77959e-06	0	0	upregulated
230300_at	NA	NA	NA	0.0460957	0	0	upregulated
230345_at	NA	NA	NA	0.0025504	0	upregulated	0
230440_at	16q24	ZNF469	zinc finger protein 469	0.000974447	0	upregulated	upregulated
230503_at	NA	NA	NA	0.00714749	0	downregulated	downregulated
230604_at	NA	NA	NA	0.00272469	0	0	downregulated
230664_at	Xq22.2	H2BFM	H2B histone family, member M	0.0131696	0	downregulated	0
230687_at	20q12-q13.1	SLC13A3	solute carrier family 13 (sodium-dependent dicarboxylate transporter), member 3	0.0086598	0	upregulated	upregulated
230708_at	12q12	PRICKLE1	prickle homolog 1 (Drosophila)	0.000248836	0	upregulated	0
230722_at	9p22.3-p22.2	BNC2	basonuclin 2	0.0382252	0	downregulated	0
230733_at	NA	NA	NA	8.80645e-06	0	downregulated	downregulated
230746_s_at	8p21-p11.2	STC1	stanniocalcin 1	0.000509249	0	upregulated	0
230764_at	NA	NA	NA	0.0235724	0	0	upregulated
230779_at	22q13.1	TNRC6B	trinucleotide repeat containing 6B	0.0207378	0	downregulated	0
230795_at	NA	NA	NA	0.000718736	0	0	upregulated
230799_at	2p21	LOC388948	hypothetical gene supported by BC062774	0.0024288	0	upregulated	0
231035_s_at	10p12.2	OTUD1	OTU domain containing 1	0.000264651	0	upregulated	upregulated
231041_at	9p13.2	POLR1E	polymerase (RNA) I polypeptide E, 53kDa	0.0037216	0	0	upregulated
231067_s_at	NA	NA	NA	0.0017105	0	upregulated	upregulated
231075_x_at	2q33	RAPH1	Ras association (RalGDS/AF-6) and pleckstrin homology domains 1	0.0189811	0	upregulated	0
231094_s_at	6q25.1	MTHFD1L	methylenetetrahydrofolate dehydrogenase (NADP+ dependent) 1-like	0.00156647	0	upregulated	upregulated
231183_s_at	20p12.1-p11.23	JAG1	jagged 1 (Alagille syndrome)	0.00139307	0	upregulated	0
231202_at	12q23.3	ALDH1L2	aldehyde dehydrogenase 1 family, member L2	0.00420075	0	0	upregulated
231312_at	NA	NA	NA	0.0249865	0	upregulated	0
231578_at	1p22.2	GBP1	guanylate binding protein 1, interferon-inducible, 67kDa	7.58943e-05	0	downregulated	downregulated
231828_at	9q33.2	LOC253039	hypothetical LOC253039	0.00430894	0	0	upregulated
231844_at	7q32.1	MGC27345	hypothetical protein MGC27345	0.047038	0	0	upregulated
231849_at	12q13.13	KRT80	keratin 80	7.0679e-05	0	upregulated	upregulated
231879_at	6q12-q13	COL12A1	collagen, type XII, alpha 1	0.0497408	0	0	upregulated
231890_at	NA	NA	NA	0.00978862	0	downregulated	downregulated
231894_at	NA	NA	NA	0.00116458	0	upregulated	upregulated
231907_at	1q24-q25	ABL2	v-abl Abelson murine leukemia viral oncogene homolog 2 (arg, Abelson-related gene)	0.00326275	0	0	downregulated
231990_at	12q14	USP15	ubiquitin specific peptidase 15	0.00169687	0	upregulated	upregulated
232012_at	11q13	CAPN1	calpain 1, (mu/I) large subunit	0.0309858	0	0	upregulated
232017_at	9q13-q21	TJP2	tight junction protein 2 (zona occludens 2)	0.0019124	0	upregulated	upregulated
232026_at	10q21.3	HERC4	hect domain and RLD 4	0.000415134	upregulated	upregulated	0
232060_at	1p32-p31	ROR1	receptor tyrosine kinase-like orphan receptor 1	0.00525197	0	0	upregulated
232174_at	NA	NA	NA	0.00542759	0	0	downregulated
232181_at	5q33.1	LOC153346	hypothetical protein LOC153346	0.0203683	0	upregulated	0
232184_at	2q33.1	ALS2	amyotrophic lateral sclerosis 2 (juvenile)	0.00202826	0	0	upregulated
232263_at	12q21.3	SLC6A15	solute carrier family 6 (neutral amino acid transporter), member 15	0.000374908	0	0	upregulated
232270_at	9q22.32	C9orf3	chromosome 9 open reading frame 3	0.00866665	0	upregulated	upregulated
232283_at	1q21.2	LYSMD1	LysM, putative peptidoglycan-binding, domain containing 1	0.02173	0	downregulated	upregulated
232290_at	NA	NA	NA	0.000842735	upregulated	0	0
232341_x_at	9q22.3-q31	HABP4	hyaluronan binding protein 4	0.0285109	0	upregulated	0
232406_at	NA	NA	NA	0.024745	0	0	downregulated
232420_x_at	9q34.3	LOC286260	hypothetical protein LOC286260	0.0412524	0	0	upregulated
232446_at	4q35.1	MGC45800	hypothetical LOC90768	0.00117083	0	upregulated	upregulated
232471_at	NA	NA	NA	0.000137357	0	downregulated	downregulated
232530_at	3q26	PLD1	phospholipase D1, phosphatidylcholine-specific	0.00408206	0	upregulated	downregulated
232555_at	NA	NA	NA	0.00531754	0	downregulated	downregulated
232710_at	NA	NA	NA	0.0420357	0	0	upregulated
232744_x_at	NA	NA	NA	0.00560118	0	downregulated	downregulated
232746_at	2q37.3	CXCR7	chemokine (C-X-C motif) receptor 7	0.000803193	upregulated	upregulated	upregulated
232780_s_at	1p34.2	ZNF691	zinc finger protein 691	0.00152962	0	0	upregulated
233073_at	NA	NA	NA	0.000147964	0	downregulated	downregulated
233085_s_at	2q32.3	OBFC2A	oligonucleotide/oligosaccharide-binding fold containing 2A	9.76436e-05	downregulated	upregulated	upregulated
233341_s_at	2q13	POLR1B	polymerase (RNA) I polypeptide B, 128kDa	0.00222969	0	upregulated	upregulated
233533_at	17q12-q21	KRTAP1-5	keratin associated protein 1-5	3.53174e-06	0	upregulated	downregulated
233803_s_at	17p13.3	MYBBP1A	MYB binding protein (P160) 1a	0.00545563	0	upregulated	upregulated
233824_at	NA	NA	NA	0.000263584	0	downregulated	downregulated
233914_s_at	11p15.4	SBF2	SET binding factor 2	0.0345586	0	downregulated	downregulated
234192_s_at	9q21.32	GKAP1	G kinase anchoring protein 1	0.0019511	0	downregulated	downregulated
234799_at	21q22.3	ADARB1	adenosine deaminase, RNA-specific, B1 (RED1 homolog rat)	0.000143472	0	upregulated	upregulated
234985_at	11p13	LDLRAD3	low density lipoprotein receptor class A domain containing 3	0.0321631	0	0	upregulated
234994_at	6q23.1	TMEM200A	transmembrane protein 200A	0.0226554	0	upregulated	0
235004_at	6p22.3	RBM24	RNA binding motif protein 24	0.000224157	0	upregulated	0
235020_at	18q11.2	TAF4B	TAF4b RNA polymerase II, TATA box binding protein (TBP)-associated factor, 105kDa	0.00151752	0	0	upregulated
235024_at	4q26-q27	PHF17	PHD finger protein 17	0.0263274	0	upregulated	0
235026_at	12q14.2	C12orf66	chromosome 12 open reading frame 66	0.00155798	0	0	upregulated
235033_at	20q13.32	NPEPL1	aminopeptidase-like 1	0.00426148	0	0	upregulated
235061_at	4q22.1	PPM1K	protein phosphatase 1K (PP2C domain containing)	0.000121455	0	downregulated	downregulated
235085_at	8p23.1	PRAGMIN	homolog of rat pragma of Rnd2	0.000147964	0	upregulated	0
235086_at	15q15	THBS1	thrombospondin 1	4.95105e-06	0	upregulated	0
235109_at	NA	NA	NA	0.034951	0	0	upregulated
235122_at	1p34	HIVEP3	human immunodeficiency virus type I enhancer binding protein 3	0.0195831	0	upregulated	0
235142_at	1p35.1	ZBTB8	zinc finger and BTB domain containing 8	0.0301093	0	upregulated	upregulated
235146_at	12q22	TMCC3	transmembrane and coiled-coil domain family 3	0.000963185	0	downregulated	downregulated
235165_at	20q13.13	PARD6B	par-6 partitioning defective 6 homolog beta (C. elegans)	0.0115479	0	downregulated	0
235173_at	3q25.1	hCG_1806964	hypothetical LOC401093	0.000557069	0	upregulated	downregulated
235190_at	NA	NA	NA	0.0369344	0	downregulated	downregulated
235228_at	2p16.1	CCDC85A	coiled-coil domain containing 85A	0.0113547	0	0	upregulated
235236_at	5q35.1	LOC100131897	Uncharacterized protein LOC100131897	2.55884e-05	0	upregulated	upregulated
235305_s_at	1p32.3	ECHDC2	enoyl Coenzyme A hydratase domain containing 2	0.000291015	0	downregulated	0
235315_at	13q14	TSC22D1	TSC22 domain family, member 1	0.0442373	0	upregulated	0
235367_at	10q21.3	MYPN	myopalladin	0.00010557	0	upregulated	upregulated
235389_at	20q11.22-q11.23	PHF20	PHD finger protein 20	0.00750206	0	0	downregulated
235392_at	2q36	IRS1	insulin receptor substrate 1	0.000102089	0	0	downregulated
235404_at	10q21.2	ARID5B	AT rich interactive domain 5B (MRF1-like)	0.0452731	0	0	downregulated
235417_at	1p35.2	SPOCD1	SPOC domain containing 1	1.37491e-05	0	upregulated	upregulated
235419_at	NA	NA	NA	0.0019124	0	0	downregulated
235424_at	NA	NA	NA	0.00530602	0	0	upregulated
235436_at	9q34.13	DDX31	DEAD (Asp-Glu-Ala-Asp) box polypeptide 31	0.0158451	0	0	upregulated
235456_at	NA	NA	NA	0.000701137	0	0	upregulated
235474_at	NA	NA	NA	0.0205892	0	downregulated	0
235513_at	NA	NA	NA	0.00874769	0	0	upregulated
235591_at	14q13	SSTR1	somatostatin receptor 1	0.000143222	0	upregulated	upregulated
235592_at	NA	NA	NA	0.0137025	0	0	downregulated
235629_at	NA	NA	NA	0.000166454	0	downregulated	downregulated
235698_at	16q22.1	ZFP90	zinc finger protein 90 homolog (mouse)	0.00226442	0	downregulated	0
235711_at	7p13	PURB	purine-rich element binding protein B	0.00527223	0	upregulated	0
235728_at	17p13.2	ZFP3	zinc finger protein 3 homolog (mouse)	0.00816401	0	downregulated	upregulated
235729_at	2q11.1	ZNF514	zinc finger protein 514	0.0104177	0	0	upregulated
235737_at	5q22.1	TSLP	thymic stromal lymphopoietin	0.000895713	0	upregulated	upregulated
235760_at	5q35.2-q35.3	NSD1	nuclear receptor binding SET domain protein 1	0.0128677	0	0	upregulated
235771_at	NA	NA	NA	0.00151752	0	0	downregulated
235772_at	NA	NA	NA	0.0377764	0	0	upregulated
235926_at	NA	NA	NA	0.0240275	0	0	upregulated
235927_at	2p16	XPO1	exportin 1 (CRM1 homolog, yeast)	0.0229364	0	0	upregulated
236029_at	11q14.3	FAT3	FAT tumor suppressor homolog 3 (Drosophila)	0.0151327	0	0	upregulated
236079_at	4p16.1	DKFZp667E0512	hypothetical protein DKFZp667E0512	1.05571e-06	0	downregulated	downregulated
236201_at	NA	NA	NA	0.000957974	0	downregulated	downregulated
236229_at	NA	NA	NA	0.0104593	0	0	upregulated
236273_at	1p36.13	NBPF1	neuroblastoma breakpoint family, member 1	0.0122081	0	0	upregulated
236316_at	7q31	FAM3C	family with sequence similarity 3, member C	0.00430902	0	downregulated	downregulated
236379_at	NA	NA	NA	0.0242766	0	downregulated	0
236396_at	NA	NA	NA	0.0278848	0	upregulated	upregulated
236404_at	NA	NA	NA	0.000622092	0	downregulated	downregulated
236453_at	9p12	LOC100132167	similar to hCG1993567	0.00417762	0	downregulated	downregulated
236599_at	NA	NA	NA	0.0160257	0	upregulated	upregulated
236656_s_at	NA	LOC100130506	hypothetical protein LOC100130506	0.000881311	0	upregulated	0
236657_at	NA	LOC100130506	hypothetical protein LOC100130506	0.00523155	0	upregulated	0
236725_at	5q35.1	WWC1	WW and C2 domain containing 1	0.0047555	0	upregulated	0
236901_at	NA	NA	NA	0.0327956	0	0	upregulated
237016_at	6p21.2	TMEM217	transmembrane protein 217	0.000269215	0	upregulated	0
237032_x_at	14q24.2	SIPA1L1	signal-induced proliferation-associated 1 like 1	0.034188	0	0	upregulated
237034_at	NA	NA	NA	0.000107756	0	0	downregulated
237290_at	NA	NA	NA	0.000382737	0	downregulated	downregulated
237411_at	5q12	ADAMTS6	ADAM metallopeptidase with thrombospondin type 1 motif, 6	4.07544e-06	0	upregulated	0
238012_at	9q34.3	DPP7	dipeptidyl-peptidase 7	0.0488949	0	0	upregulated
238032_at	NA	NA	NA	3.03764e-06	upregulated	downregulated	downregulated
238049_at	5q23.2	GRAMD3	GRAM domain containing 3	0.000105381	0	downregulated	downregulated
238068_at	3p21.2-p21.3	ARIH2	ariadne homolog 2 (Drosophila)	0.00257569	0	upregulated	upregulated
238089_at	15q11-q13	MAN2C1	mannosidase, alpha, class 2C, member 1	0.00199365	0	0	upregulated
238149_at	19q13.41	ZNF818P	zinc finger protein 818 pseudogene	0.0139771	0	downregulated	0
238412_at	16p12.1	LOC100131998	hypothetical protein LOC100131998	0.0242816	0	upregulated	0
238452_at	1q23.3	FCRLB	Fc receptor-like B	0.000418916	0	upregulated	upregulated
238468_at	22q13.1	TNRC6B	trinucleotide repeat containing 6B	0.0123267	0	downregulated	0
238509_at	7q36.1	CUL1	cullin 1	0.00669881	0	upregulated	upregulated
238549_at	20q11	CBFA2T2	core-binding factor, runt domain, alpha subunit 2; translocated to, 2	0.000481894	0	0	upregulated
238575_at	2q31-q32.1	OSBPL6	oxysterol binding protein-like 6	0.0132911	0	0	upregulated
238623_at	NA	NA	NA	0.00104451	0	upregulated	upregulated
238653_at	1p13.1	LRIG2	leucine-rich repeats and immunoglobulin-like domains 2	0.00207625	0	0	upregulated
238666_at	NA	NA	NA	0.000102089	0	0	upregulated
238688_at	15q22.1	TPM1	tropomyosin 1 (alpha)	0.00173841	0	downregulated	downregulated
238722_x_at	7q22.1	NAPEPLD	N-acyl phosphatidylethanolamine phospholipase D	0.0444449	0	downregulated	0
238733_at	NA	NA	NA	0.000313937	0	downregulated	0
238825_at	Xq13.1	ACRC	acidic repeat containing	0.00029097	0	0	upregulated
238852_at	NA	NA	NA	0.0176772	0	downregulated	0
238908_at	7q32.1	CALU	calumenin	0.00930938	0	downregulated	downregulated
238933_at	2q36	IRS1	insulin receptor substrate 1	0.000233629	0	0	downregulated
238944_at	19q13.31	ZNF404	zinc finger protein 404	0.0106425	0	downregulated	downregulated
238987_at	9p13	B4GALT1	UDP-Gal:betaGlcNAc beta 1,4- galactosyltransferase, polypeptide 1	0.0371615	0	upregulated	0
239043_at	19q13.31	ZNF404	zinc finger protein 404	0.00117083	0	downregulated	downregulated
239058_at	NA	NA	NA	0.00100127	0	upregulated	upregulated
239083_at	7q36.1	ZNF786	zinc finger protein 786	0.00740797	0	0	upregulated
239086_at	NA	NA	NA	0.000792017	0	0	upregulated
239154_at	NA	NA	NA	0.0468918	0	0	upregulated
239210_at	NA	NA	NA	0.000166169	0	0	downregulated
239231_at	NA	NA	NA	0.0108428	0	0	upregulated
239331_at	NA	NA	NA	0.00458722	0	downregulated	downregulated
239367_at	11p13	BDNF	brain-derived neurotrophic factor	1.90554e-05	0	upregulated	0
239410_at	NA	NA	NA	0.000546379	0	upregulated	upregulated
239648_at	16p12.2	ERI2	exoribonuclease 2	0.00257569	0	0	downregulated
239680_at	NA	NA	NA	0.0115299	0	downregulated	0
239785_at	3q22.3	DZIP1L	DAZ interacting protein 1-like	0.00751782	0	upregulated	0
239804_at	NA	NA	NA	0.0298127	0	downregulated	0
239809_at	NA	NA	NA	0.000630012	0	downregulated	downregulated
239831_at	12q13.1	TMEM106C	transmembrane protein 106C	0.00146978	0	0	upregulated
239843_at	1q22	RIT1	Ras-like without CAAX 1	0.00437915	0	downregulated	0
239942_at	NA	NA	NA	0.00082767	upregulated	0	downregulated
240038_at	NA	NA	NA	0.0142354	0	0	downregulated
240166_x_at	9p13.2	RG9MTD3	RNA (guanine-9-) methyltransferase domain containing 3	0.0403402	0	0	upregulated
240231_at	NA	NA	NA	0.00060177	0	downregulated	downregulated
240385_at	NA	NA	NA	0.00838064	0	0	downregulated
240410_at	NA	NA	NA	0.000637752	0	downregulated	downregulated
240432_x_at	NA	NA	NA	0.00112663	0	0	downregulated
240690_at	NA	NA	NA	0.00189541	0	0	downregulated
240891_at	3q13.33	FSTL1	follistatin-like 1	0.00364546	0	upregulated	0
240908_at	NA	NA	NA	0.000188619	0	0	upregulated
241022_at	NA	NA	NA	0.00400542	0	upregulated	upregulated
241114_s_at	NA	NA	NA	0.0028713	0	0	upregulated
241198_s_at	11q22.1	C11orf70	chromosome 11 open reading frame 70	0.0314612	0	0	downregulated
241353_s_at	7q34	LOC100129105	similar to hCG1821214	0.00523155	0	upregulated	0
241404_at	NA	NA	NA	9.91441e-05	0	upregulated	upregulated
241425_at	13q12.13	NUPL1	nucleoporin like 1	0.00247963	0	downregulated	downregulated
241435_at	NA	NA	NA	0.000181421	0	downregulated	downregulated
241700_at	8q21.11	ZFHX4	zinc finger homeobox 4	0.0263859	0	upregulated	0
241721_at	NA	NA	NA	0.019308	0	downregulated	downregulated
241763_s_at	8q24.13	FBXO32	F-box protein 32	0.000121455	0	upregulated	upregulated
241773_at	NA	NA	NA	0.00111907	0	upregulated	0
241803_s_at	20q11.1	LOC100130623	hypothetical protein LOC100130623	7.0679e-05	0	0	downregulated
241937_s_at	21q22.3	WDR4	WD repeat domain 4	0.00146331	0	upregulated	upregulated
241954_at	8p23.1-p22	FDFT1	farnesyl-diphosphate farnesyltransferase 1	8.85513e-05	0	0	upregulated
242028_at	19p13.2	ZNF443	zinc finger protein 443	0.039469	0	0	upregulated
242073_at	NA	NA	NA	0.0442833	0	0	upregulated
242218_at	6p21.2-p21.1	PPARD	peroxisome proliferator-activated receptor delta	0.00173316	0	upregulated	upregulated
242222_at	2q13	LOC440894	hypothetical protein LOC440894	0.0061032	0	upregulated	0
242228_at	NA	NA	NA	0.00125678	0	0	upregulated
242230_at	6p23	ATXN1	ataxin 1	0.000232343	0	upregulated	downregulated
242244_at	NA	NA	NA	0.0231419	0	downregulated	downregulated
242265_at	5q31	BRD8	bromodomain containing 8	0.000165081	0	0	upregulated
242272_at	16p11.2	ZNF785	zinc finger protein 785	0.00811601	0	0	upregulated
242329_at	7p15.1	CREB5	cAMP responsive element binding protein 5	3.73905e-06	0	upregulated	upregulated
242417_at	11p15.1	PLEKHA7	pleckstrin homology domain containing, family A member 7	0.000436468	0	upregulated	upregulated
242424_at	NA	NA	NA	0.00526762	0	0	upregulated
242618_at	6p21.3	TRIM26	tripartite motif-containing 26	0.0345769	0	0	upregulated
242657_at	NA	NA	NA	0.0162131	0	upregulated	0
242853_at	NA	NA	NA	0.00339027	0	downregulated	downregulated
242905_at	2p14	PNO1	partner of NOB1 homolog (S. cerevisiae)	0.00176926	0	0	upregulated
242907_at	NA	NA	NA	0.0107529	0	0	downregulated
242939_at	13q34	TFDP1	transcription factor Dp-1	0.0222409	0	0	upregulated
242979_at	2q36	IRS1	insulin receptor substrate 1	0.0165554	0	upregulated	0
243445_at	9p22.3-p22.2	BNC2	basonuclin 2	0.00399908	0	0	upregulated
243529_at	2q33.1	MARS2	methionyl-tRNA synthetase 2, mitochondrial	0.00608764	0	upregulated	upregulated
243591_at	NA	NA	NA	0.0298127	0	0	downregulated
243618_s_at	4q31.22	ZNF827	zinc finger protein 827	0.00204194	0	upregulated	0
243711_at	1p22	DDAH1	dimethylarginine dimethylaminohydrolase 1	2.94514e-05	0	upregulated	upregulated
243829_at	7q34	BRAF	v-raf murine sarcoma viral oncogene homolog B1	0.0319474	0	0	upregulated
243874_at	3q28	LPP	LIM domain containing preferred translocation partner in lipoma	0.00219209	0	downregulated	downregulated
243966_at	NA	NA	NA	0.00656319	0	0	upregulated
244025_at	NA	NA	NA	0.00292625	upregulated	upregulated	0
244149_at	NA	NA	NA	0.000481113	0	upregulated	upregulated
244261_at	1p36.11	IL28RA	interleukin 28 receptor, alpha (interferon, lambda receptor)	0.00045059	0	downregulated	0
244271_at	NA	NA	NA	0.00258635	0	0	upregulated
244353_s_at	6q23.2	SLC2A12	solute carrier family 2 (facilitated glucose transporter), member 12	0.000342717	0	0	downregulated
244406_at	19p13.2	ZNF625	zinc finger protein 625	0.00652852	0	0	upregulated
244427_at	15q23	KIF23	kinesin family member 23	0.0384933	0	downregulated	0
244447_at	NA	NA	NA	0.000436468	0	0	downregulated
244519_at	20q11.1	ASXL1	additional sex combs like 1 (Drosophila)	0.00195802	0	upregulated	upregulated
244640_at	19q13.12	ZNF850P	zinc finger protein 850 pseudogene	0.000342862	0	downregulated	downregulated
244669_at	6q14.3	SNHG5	small nucleolar RNA host gene 5 (non-protein coding)	0.0487965	0	0	upregulated
244788_at	NA	NA	NA	0.000756128	0	upregulated	0
244864_at	NA	NA	NA	0.0200776	0	upregulated	0
36711_at	22q13.1	MAFF	v-maf musculoaponeurotic fibrosarcoma oncogene homolog F (avian)	2.21466e-05	0	upregulated	downregulated
37547_at	7p14	BBS9	Bardet-Biedl syndrome 9	0.0401391	0	0	downregulated
37943_at	14q24.1	ZFYVE26	zinc finger, FYVE domain containing 26	0.0386677	0	downregulated	0
38037_at	5q23	HBEGF	heparin-binding EGF-like growth factor	7.82275e-06	0	upregulated	downregulated
38241_at	6p21.3	BTN3A3	butyrophilin, subfamily 3, member A3	0.0052177	0	0	downregulated
39248_at	9p13	AQP3	aquaporin 3 (Gill blood group)	0.000356711	0	upregulated	upregulated
41037_at	12p13.3-p13.2	TEAD4	TEA domain family member 4	0.0058167	0	upregulated	upregulated
41113_at	16p13.3	ZNF500	zinc finger protein 500	0.0312599	0	0	upregulated
47069_at	22q13	PRR5	proline rich 5 (renal)	0.00144833	0	upregulated	upregulated
52255_s_at	19p13.2	COL5A3	collagen, type V, alpha 3	0.00127571	0	upregulated	upregulated
57739_at	5q31.3	DND1	dead end homolog 1 (zebrafish)	0.0118807	0	0	upregulated
59644_at	4q21.21	BMP2K	BMP2 inducible kinase	0.00425376	0	0	upregulated
60474_at	20p12.3	FERMT1	fermitin family homolog 1 (Drosophila)	0.0210644	0	0	upregulated
65585_at	8p23.1	FAM86B1	family with sequence similarity 86, member B1	0.0096602	0	0	upregulated
65588_at	20q11.23	LOC388796	hypothetical LOC388796	0.00202013	0	upregulated	upregulated
91617_at	22q11.1-22q13	TRMT2A	TRM2 tRNA methyltransferase 2 homolog A (S. cerevisiae)	0.0153667	0	0	upregulated

## Sheet:  Table S1c
Table S1c. Differentially expressed genes in common between BPH1 and PrSF cells in the different time points.
ID	LOCUS	SYMBOL	Descr
1555724_s_at	11q23.2	TAGLN	transgelin
200874_s_at	20p13	NOP56	NOP56 ribonucleoprotein homolog (yeast)
201475_x_at	12q13.2	MARS	methionyl-tRNA synthetase
202003_s_at	18q21.1	ACAA2	acetyl-Coenzyme A acyltransferase 2
202847_at	14q12	PCK2	phosphoenolpyruvate carboxykinase 2 (mitochondrial)
203234_at	7p12.3	UPP1	uridine phosphorylase 1
203633_at	11q13.1-q13.2	CPT1A	carnitine palmitoyltransferase 1A (liver)
204537_s_at	Xq28	GABRE	gamma-aminobutyric acid (GABA) A receptor, epsilon
204554_at	20q13.3	PPP1R3D	protein phosphatase 1, regulatory (inhibitor) subunit 3D
204933_s_at	8q24	TNFRSF11B	tumor necrosis factor receptor superfamily, member 11b
205047_s_at	7q21.3	ASNS	asparagine synthetase
209112_at	12p13.1-p12	CDKN1B	cyclin-dependent kinase inhibitor 1B (p27, Kip1)
209230_s_at	16p11.2	NUPR1	nuclear protein 1
209725_at	12q23	UTP20	UTP20, small subunit (SSU) processome component, homolog (yeast)
209864_at	10q24.1	FRAT2	frequently rearranged in advanced T-cell lymphomas 2
209971_x_at	7p22	JTV1	JTV1 gene
210688_s_at	11q13.1-q13.2	CPT1A	carnitine palmitoyltransferase 1A (liver)
211796_s_at	12q13.2	IL23A	interleukin 23, alpha subunit p19
212563_at	8q24.3	BOP1	block of proliferation 1
218305_at	14q12	IPO4	importin 4
218904_s_at	9q21.13	C9orf40	chromosome 9 open reading frame 40
219889_at	10q24.1	FRAT1	frequently rearranged in advanced T-cell lymphomas
220892_s_at	9q21.2	PSAT1	phosphoserine aminotransferase 1
221805_at	8p21	NEFL	neurofilament, light polypeptide
223062_s_at	9q21.2	PSAT1	phosphoserine aminotransferase 1
224797_at	5q14.3	ARRDC3	arrestin domain containing 3
226114_at	1p36	ZNF436	zinc finger protein 436
226649_at	10q23.31	PANK1	pantothenate kinase 1
232780_s_at	1p34.2	ZNF691	zinc finger protein 691
235927_at	2p16	XPO1	exportin 1 (CRM1 homolog, yeast)
238549_at	20q11	CBFA2T2	core-binding factor, runt domain, alpha subunit 2; translocated to, 2
242028_at	19p13.2	ZNF443	zinc finger protein 443
1554966_a_at	3q12.1	FILIP1L	filamin A interacting protein 1-like
1555420_a_at	2q32	KLF7	Kruppel-like factor 7 (ubiquitous)
1562415_a_at	1p35.2	SPOCD1	SPOC domain containing 1
201341_at	5q12-q13.3	ENC1	ectodermal-neural cortex (with BTB-like domain)
202481_at	1p36.1	DHRS3	dehydrogenase/reductase (SDR family) member 3
202936_s_at	17q24.3-q25.1	SOX9	SRY (sex determining region Y)-box 9
203499_at	1p36	EPHA2	EPH receptor A2
203504_s_at	9q31.1	ABCA1	ATP-binding cassette, sub-family A (ABC1), member 1
204199_at	9q33.3	RALGPS1	Ral GEF with PH domain and SH3 binding motif 1
204334_at	2q32	KLF7	Kruppel-like factor 7 (ubiquitous)
204820_s_at	6p21.3	BTN3A3	butyrophilin, subfamily 3, member A3
205193_at	22q13.1	MAFF	v-maf musculoaponeurotic fibrosarcoma oncogene homolog F (avian)
206382_s_at	11p13	BDNF	brain-derived neurotrophic factor
209101_at	6q23.1	CTGF	connective tissue growth factor
218273_s_at	8q22.1	PPM2C	protein phosphatase 2C, magnesium-dependent, catalytic subunit
219563_at	14q32.13	C14orf139	chromosome 14 open reading frame 139
219885_at	17q12	SLFN12	schlafen family member 12
221563_at	1q41	DUSP10	dual specificity phosphatase 10
222572_at	8q22.1	PPM2C	protein phosphatase 2C, magnesium-dependent, catalytic subunit
223599_at	11p15.4	TRIM6	tripartite motif-containing 6
224657_at	1p36	ERRFI1	ERBB receptor feedback inhibitor 1
225842_at	12q15	PHLDA1	pleckstrin homology-like domain, family A, member 1
226683_at	5q11.2	SNX18	sorting nexin 18
226893_at	1q24-q25	ABL2	v-abl Abelson murine leukemia viral oncogene homolog 2 (arg, Abelson-related gene)
226978_at	22q12-q13.1	PPARA	peroxisome proliferator-activated receptor alpha
227420_at	19p13.3	TNFAIP8L1	tumor necrosis factor, alpha-induced protein 8-like 1
227458_at	NA	NA	NA
227703_s_at	Xq21.33	SYTL4	synaptotagmin-like 4
228667_at	6q26	AGPAT4	1-acylglycerol-3-phosphate O-acyltransferase 4 (lysophosphatidic acid acyltransferase, delta)
231907_at	1q24-q25	ABL2	v-abl Abelson murine leukemia viral oncogene homolog 2 (arg, Abelson-related gene)
240432_x_at	NA	NA	NA
244353_s_at	6q23.2	SLC2A12	solute carrier family 2 (facilitated glucose transporter), member 12
36711_at	22q13.1	MAFF	v-maf musculoaponeurotic fibrosarcoma oncogene homolog F (avian)
226034_at	NA	NA	NA
202340_x_at	12q13	NR4A1	nuclear receptor subfamily 4, group A, member 1
202887_s_at	10pter-q26.12	DDIT4	DNA-damage-inducible transcript 4
203394_s_at	3q28-q29	HES1	hairy and enhancer of split 1, (Drosophila)
203395_s_at	3q28-q29	HES1	hairy and enhancer of split 1, (Drosophila)
203438_at	5q35.2	STC2	stanniocalcin 2
203439_s_at	5q35.2	STC2	stanniocalcin 2
203821_at	5q23	HBEGF	heparin-binding EGF-like growth factor
204027_s_at	12q13	METTL1	methyltransferase like 1
204203_at	19q13.11	CEBPG	CCAAT/enhancer binding protein (C/EBP), gamma
204222_s_at	12q21.2	GLIPR1	GLI pathogenesis-related 1
204326_x_at	16q13	MT1X	metallothionein 1X
204457_s_at	9q21.3-q22	GAS1	growth arrest-specific 1
204472_at	8q13-q21	GEM	GTP binding protein overexpressed in skeletal muscle
204614_at	18q21.3	SERPINB2	serpin peptidase inhibitor, clade B (ovalbumin), member 2
204622_x_at	2q22-q23	NR4A2	nuclear receptor subfamily 4, group A, member 2
204745_x_at	16q13	MT1G	metallothionein 1G
205207_at	7p21	IL6	interleukin 6 (interferon, beta 2)
206034_at	18q21.3	SERPINB8	serpin peptidase inhibitor, clade B (ovalbumin), member 8
206461_x_at	16q13	MT1H	metallothionein 1H
208581_x_at	16q13	MT1X	metallothionein 1X
209212_s_at	13q22.1	KLF5	Kruppel-like factor 5 (intestinal)
209567_at	8q13.1	RRS1	RRS1 ribosome biogenesis regulator homolog (S. cerevisiae)
209774_x_at	4q21	CXCL2	chemokine (C-X-C motif) ligand 2
210524_x_at	NA	NA	NA
211456_x_at	1q43	MT1P2	metallothionein 1 pseudogene 2
211518_s_at	14q22-q23	BMP4	bone morphogenetic protein 4
212185_x_at	16q13	MT2A	metallothionein 2A
212859_x_at	16q13	MT1E	metallothionein 1E
213629_x_at	16q13	MT1F	metallothionein 1F
214011_s_at	5q35.2	NOP16	NOP16 nucleolar protein homolog (yeast)
214427_at	12p13	NOP2	NOP2 nucleolar protein homolog (yeast)
216336_x_at	16q13	MT1E	metallothionein 1E
217165_x_at	16q13	MT1F	metallothionein 1F
217168_s_at	16q12.2-q13	HERPUD1	homocysteine-inducible, endoplasmic reticulum stress-inducible, ubiquitin-like domain member 1
217370_x_at	16p11.2	FUS	fusion (involved in t(12;16) in malignant liposarcoma)
217546_at	16q13	MT1M	metallothionein 1M
217997_at	12q15	PHLDA1	pleckstrin homology-like domain, family A, member 1
218145_at	20p13-p12.2	TRIB3	tribbles homolog 3 (Drosophila)
219131_at	1p36-p34.1	UBIAD1	UbiA prenyltransferase domain containing 1
219270_at	15q15.1	CHAC1	ChaC, cation transport regulator homolog 1 (E. coli)
221009_s_at	19p13.3	ANGPTL4	angiopoietin-like 4
223333_s_at	19p13.3	ANGPTL4	angiopoietin-like 4
223774_at	1p35.3	SNHG12	small nucleolar RNA host gene 12 (non-protein coding)
224978_s_at	17q25.3	USP36	ubiquitin specific peptidase 36
225207_at	7q21.3	PDK4	pyruvate dehydrogenase kinase, isozyme 4
225699_at	7p13	C7orf40	chromosome 7 open reading frame 40
225803_at	8q24.13	FBXO32	F-box protein 32
226908_at	12q14.1	LRIG3	leucine-rich repeats and immunoglobulin-like domains 3
227037_at	17p11.2	PLD6	phospholipase D family, member 6
227093_at	17q25.3	USP36	ubiquitin specific peptidase 36
227099_s_at	11p11.2	LOC387763	hypothetical protein LOC387763
227443_at	9p23	C9orf150	chromosome 9 open reading frame 150
227699_at	14q23.1	C14orf149	chromosome 14 open reading frame 149
232181_at	5q33.1	LOC153346	hypothetical protein LOC153346
235737_at	5q22.1	TSLP	thymic stromal lymphopoietin
238987_at	9p13	B4GALT1	UDP-Gal:betaGlcNAc beta 1,4- galactosyltransferase, polypeptide 1
239410_at	NA	NA	NA
243529_at	2q33.1	MARS2	methionyl-tRNA synthetase 2, mitochondrial
38037_at	5q23	HBEGF	heparin-binding EGF-like growth factor
65588_at	20q11.23	LOC388796	hypothetical LOC388796
208707_at	14q32.32	EIF5	eukaryotic translation initiation factor 5
209741_x_at	15q24	SCAPER	S phase cyclin A-associated protein in the ER
212867_at	NA	NA	NA
213073_at	14q24.1	ZFYVE26	zinc finger, FYVE domain containing 26
213349_at	3q21.3	TMCC1	transmembrane and coiled-coil domain family 1
217047_s_at	4q22.1	FAM13A	family with sequence similarity 13, member A
218259_at	16p13.12	MKL2	MKL/myocardin-like 2
219570_at	20p11.23	KIF16B	kinesin family member 16B
223220_s_at	3q13-q21	PARP9	poly (ADP-ribose) polymerase family, member 9
224365_s_at	16p13.3	TIGD7	tigger transposable element derived 7
227112_at	3q21.3	TMCC1	transmembrane and coiled-coil domain family 1
227930_at	1p34.3	EIF2C4	eukaryotic translation initiation factor 2C, 4
229111_at	NA	NA	NA
236079_at	4p16.1	DKFZp667E0512	hypothetical protein DKFZp667E0512

## Sheet: Table S1d
Table S1d. GO biological processes differentially regulated in the different time points in BPH1 cells.
Biological process	1h	3h	6h
amino acid derivative biosynthetic process	-0.86	-	-
amino acid derivative metabolic process	-0.54	-	-
blood coagulation	-0.4	-	-
bone remodeling	-1.09	-	-
coagulation	-0.4	-	-
detection of stimulus	-1.7	-	-
homeostasis of number of cells	-0.84	-	-
negative regulation of myeloid cell differentiation	-3.85	-	-
protein kinase cascade	-0.16	-	-
regulated secretory pathway	-2.24	-	-
regulation of actin polymerization and or depolymerization	-0.81	-	-
response to external stimulus	-0.19	-	-
response to wounding	-0.26	-	-
tissue remodeling	-1.01	-	-
wound healing	-0.35	-	-
apoptotic nuclear changes	1.74	-	-
chromosome condensation	1.31	-	-
negative regulation of catalytic activity	0.54	-	-
nuclear organization and biogenesis	1.74	-	-
organ morphogenesis	0.39	-	-
positive regulation of dna binding	1.2	-	-
regulation of axonogenesis	1.24	-	-
regulation of developmental process	0.17	-	-
generation of neurons	-0.32	-	-0.64
negative regulation of response to stimulus	-1	-	-3.4
neuron differentiation	-0.36	-	-0.7
mitotic spindle organization and biogenesis	1.35	-	1.58
spindle organization and biogenesis	1.35	-	1.58
viral genome replication	1.49	-	1.62
regulation of jnk activity	-0.68	-0.88	-
regulation of myeloid cell differentiation	-1.39	-0.44	-
anatomical structure formation	0.5	0.38	-
angiogenesis	0.77	0.57	-
apoptosis go	0.25	0.18	-
cell development	0.16	0.12	-
negative regulation of apoptosis	0.54	0.49	-
negative regulation of programmed cell death	0.54	0.49	-
programmed cell death	0.25	0.18	-
regulation of apoptosis	0.26	0.21	-
regulation of programmed cell death	0.26	0.21	-
vasculature development	0.61	0.47	-
hemopoietic or lymphoid organ development	-0.8	-0.53	-0.69
immune system development	-0.8	-0.53	-0.69
leukocyte migration	-1.07	-1.16	-1.46
regulation of neurotransmitter levels	-2.36	-2.71	-3.45
sensory organ development	-1.73	-0.7	-0.85
glucose metabolic process	2.07	3.19	3.8
negative regulation of hydrolase activity	3.36	2.98	2.26
positive regulation of angiogenesis	1.99	1.99	1.53
regulation of angiogenesis	0.94	0.85	0.67
glycoprotein catabolic process	-	-1.19	-
regulation of g protein coupled receptor protein signaling pathway	-	-1.74	-
dna modification	-	2.43	-
negative regulation of developmental process	-	0.3	-
one carbon compound metabolic process	-	1.34	-
protein stabilization	-	3.4	-
regulation of protein stability	-	1.52	-
heart development	-	-0.71	-0.39
hemopoiesis	-	-0.54	-0.71
leukocyte chemotaxis	-	-1.7	-2.69
neuron apoptosis	-	-0.97	-1.18
regulation of heart contraction	-	-1.22	-1.89
regulation of neuron apoptosis	-	-1.32	-1.46
response to hypoxia	-	-0.88	-1
alcohol metabolic process	-	0.38	0.59
brain development	-	0.85	1.05
peripheral nervous system development	-	1.75	1.76
aromatic compound metabolic process	-	-	-0.63
cytokine production	-	-	-0.83
developmental maturation	-	-	-1.41
hormone secretion	-	-	-3.23
negative regulation of immune system process	-	-	-1.49
negative regulation of multicellular organismal process	-	-	-0.9
neurogenesis	-	-	-0.42
neuron development	-	-	-0.63
positive regulation of cell differentiation	-	-	-1.1
positive regulation of multicellular organismal process	-	-	-0.55
positive regulation of response to stimulus	-	-	-0.42
regulation of cell differentiation	-	-	-0.45
regulation of cytokine production	-	-	-1.61
regulation of hormone secretion	-	-	-3.23
regulation of response to stimulus	-	-	-0.5
tissue morphogenesis	-	-	-1.01
bile acid metabolic process	-	-	2.47
carbohydrate metabolic process	-	-	0.52
cellular carbohydrate metabolic process	-	-	0.49
proteolysis	-	-	0.38

## Sheet: Table S1e
Table S1e. GO biological processes differentially regulated in the different time points in PrSF cells.
Biologcal Process	1h	3h	6h
activation of mapk activity	-0.96	-	-
adenylate cyclase activation	-2.06	-	-
blood coagulation	-1.22	-	-
coagulation	-1.22	-	-
epidermal growth factor receptor signaling pathway	-1.35	-	-
g protein signaling adenylate cyclase activating pathway	-2.06	-	-
hemostasis	-1.22	-	-
hormone metabolic process	-1.19	-	-
interaction with host	-0.74	-	-
mapkkk cascade go 0000165	-0.53	-	-
nucleotide biosynthetic process	-0.96	-	-
positive regulation of catalytic activity	-0.46	-	-
positive regulation of cell differentiation	-0.2	-	-
positive regulation of map kinase activity	-0.91	-	-
positive regulation of phosphate metabolic process	-0.99	-	-
positive regulation of phosphorylation	-1.16	-	-
positive regulation of t cell proliferation	-1.6	-	-
positive regulation of transferase activity	-0.62	-	-
protein ubiquitination	-0.62	-	-
regulation of body fluid levels	-0.96	-	-
regulation of cytokine production	-0.97	-	-
regulation of kinase activity	-0.36	-	-
regulation of mitosis	-0.41	-	-
regulation of phosphorylation	-0.62	-	-
regulation of protein kinase activity	-0.36	-	-
regulation of t cell proliferation	-1.25	-	-
response to wounding	-0.26	-	-
t cell proliferation	-1.25	-	-
ubiquitin cycle	-0.63	-	-
wound healing	-0.99	-	-
activation of nf kappab transcription factor	1.04	-	-
axon guidance	1.3	-	-
cell development	0.05	-	-
cell proliferation go 0008283	0.14	-	-
cellular morphogenesis during differentiation	0.58	-	-
humoral immune response	1.82	-	-
inflammatory response	0.51	-	-
mesoderm development	1.5	-	-
negative regulation of protein metabolic process	0.63	-	-
negative regulation of rna metabolic process	0.37	-	-
negative regulation of secretion	1.13	-	-
negative regulation of transcription dna dependent	0.39	-	-
negative regulation of transcription from rna polymerase ii promoter	0.51	-	-
neurite development	0.71	-	-
neuron differentiation	0.54	-	-
nuclear organization and biogenesis	0.37	-	-
positive regulation of binding	0.41	-	-
positive regulation of dna binding	0.59	-	-
positive regulation of transcription factor activity	0.59	-	-
positive regulation of translation	1.29	-	-
protein homooligomerization	1.56	-	-
regulation of cytokine biosynthetic process	1.1	-	-
regulation of dna binding	0.43	-	-
biosynthetic process	-0.26	-	0.11
inactivation of mapk activity	-1.19	-	-1.69
regulation of map kinase activity	-0.84	-	-0.77
negative regulation of biosynthetic process	1.08	-	-0.76
negative regulation of cellular biosynthetic process	1.08	-	-0.76
negative regulation of cellular protein metabolic process	0.5	-	-0.21
response to chemical stimulus	0.26	-	0.24
skeletal development	0.4	-	0.53
positive regulation of cell cycle	-1.12	1.03	-
positive regulation of multicellular organismal process	-0.28	0.79	-
protein modification by small protein conjugation	-0.63	-0.88	-
regulation of heart contraction	-1.89	2.35	-
behavior	0.62	0.47	-
cation homeostasis	0.38	0.61	-
cell cell signaling	0.27	0.51	-
generation of a signal involved in cell cell signaling	1.21	1.98	-
hormone secretion	1.53	3.19	-
immune response	0.44	0.69	-
immune system process	0.37	0.43	-
negative regulation of cellular metabolic process	0.24	0.22	-
negative regulation of cytokine biosynthetic process	2.25	0.91	-
negative regulation of developmental process	0.25	0.28	-
negative regulation of metabolic process	0.24	0.22	-
negative regulation of nucleobase nucleoside nucleotide and nucleic acid metabolic process	0.24	0.24	-
negative regulation of transcription	0.3	0.29	-
regulation of hormone secretion	1.74	3.7	-
angiogenesis	-0.53	0.89	0.49
camp mediated signaling	-1.03	-0.88	-1.26
g protein signaling coupled to camp nucleotide second messenger	-1.03	-0.88	-1.26
regulation of catalytic activity	-0.28	-0.17	-0.33
vasculature development	-0.47	0.74	0.37
acute inflammatory response	1.28	1.92	1.2
anatomical structure formation	0.46	0.75	0.48
anatomical structure morphogenesis	0.32	0.45	0.37
glucose metabolic process	1.3	0.94	0.84
locomotory behavior	1.06	0.87	0.41
negative regulation of apoptosis	0.27	0.28	0.27
negative regulation of programmed cell death	0.25	0.33	0.29
negative regulation of translation	1.51	0.52	-0.88
positive regulation of angiogenesis	0.74	1.59	1.13
regulation of angiogenesis	0.88	1	0.8
defense response to virus	-	-1.32	-
establishment and or maintenance of cell polarity	-	-1.73	-
immune effector process	-	-0.37	-
keratinocyte differentiation	-	-1.45	-
microtubule based process	-	-0.69	-
microtubule cytoskeleton organization and biogenesis	-	-1.14	-
microtubule polymerization or depolymerization	-	-1.54	-
mitotic spindle organization and biogenesis	-	-1.77	-
negative regulation of intracellular transport	-	-2.85	-
nucleosome assembly	-	-1.28	-
protein dna complex assembly	-	-0.5	-
response to heat	-	-2.41	-
spindle organization and biogenesis	-	-1.77	-
spliceosome assembly	-	-0.42	-
transcription initiation	-	-0.41	-
actin filament based movement	-	0.98	-
alcohol metabolic process	-	0.66	-
amine biosynthetic process	-	1.8	-
amino acid derivative biosynthetic process	-	3.03	-
amino acid derivative metabolic process	-	1.8	-
anion transport	-	0.94	-
anti apoptosis	-	0.14	-
biogenic amine metabolic process	-	1.8	-
chemical homeostasis	-	0.48	-
epithelial to mesenchymal transition	-	1.3	-
homeostatic process	-	0.43	-
inorganic anion transport	-	0.94	-
jak stat cascade	-	1.15	-
negative regulation of response to stimulus	-	3.75	-
neuron apoptosis	-	0.54	-
positive regulation of cell proliferation	-	0.52	-
positive regulation of cellular protein metabolic process	-	0.41	-
positive regulation of protein metabolic process	-	0.41	-
potassium ion transport	-	0.62	-
regulation of cell proliferation	-	0.21	-
regulation of neuron apoptosis	-	0.85	-
smooth muscle contraction go 0006939	-	1.42	-
tissue morphogenesis	-	1.25	-
negative regulation of map kinase activity	-	-0.9	-1.74
peripheral nervous system development	-	-2.56	-3.05
regulation of molecular function	-	-0.15	-0.28
cyclic nucleotide mediated signaling	-	0.58	-0.78
developmental maturation	-	1.34	1.43
g protein signaling coupled to cyclic nucleotide second messenger	-	0.58	-0.78
heterophilic cell adhesion	-	2.87	1.78
insulin receptor signaling pathway	-	0.57	0.7
organ morphogenesis	-	0.74	0.6
protein tetramerization	-	1.46	3.89
regulation of developmental process	-	0.12	0.1
regulation of mitotic cell cycle	-	0.66	0.64
calcium mediated signaling	-	-	-0.96
cell activation	-	-	-0.42
central nervous system development	-	-	-0.18
circadian rhythm	-	-	-1.47
cytokine production	-	-	-0.58
dephosphorylation	-	-	-0.54
g protein coupled receptor protein signaling pathway	-	-	-0.43
interleukin 1 secretion	-	-	-2.01
leukocyte activation	-	-	-0.42
membrane lipid biosynthetic process	-	-	-0.16
negative regulation of catalytic activity	-	-	-0.66
positive regulation of i kappab kinase nf kappab cascade	-	-	-0.37
positive regulation of response to stimulus	-	-	-0.35
protein amino acid dephosphorylation	-	-	-0.54
protein kinase cascade	-	-	-0.33
protein oligomerization	-	-	-0.56
regulation of g protein coupled receptor protein signaling pathway	-	-	-1.21
regulation of i kappab kinase nf kappab cascade	-	-	-0.38
regulation of response to external stimulus	-	-	-1.83
regulation of response to stimulus	-	-	-0.19
regulation of signal transduction	-	-	-0.29
regulation of translation	-	-	-0.37
regulation of viral reproduction	-	-	-1.23
rhythmic process	-	-	-1.47
second messenger mediated signaling	-	-	-0.53
amino acid transport	-	-	1.17
b cell activation	-	-	1.29
focal adhesion formation	-	-	0.24
g1 s transition of mitotic cell cycle	-	-	0.16
lipid biosynthetic process	-	-	0.18
myeloid leukocyte differentiation	-	-	0.54
negative regulation of hydrolase activity	-	-	1.55
neutral amino acid transport	-	-	2.49
oligosaccharide metabolic process	-	-	4.95
organ development	-	-	0.33
positive regulation of dna metabolic process	-	-	1.74
protein amino acid o linked glycosylation	-	-	0.29
pyrimidine nucleotide metabolic process	-	-	1.59
sphingoid metabolic process	-	-	0.76

## Sheet:  Table S1f
Table S1f. Differentially expressed genes related to proliferation in the different time points in BPH1 cells .
ID	Gene Name	Species
222162_s_at, 222486_s_at	ADAM metallopeptidase with thrombospondin type 1 motif, 1	Homo sapiens
222895_s_at	B-cell CLL/lymphoma 11B (zinc finger protein)	Homo sapiens
203140_at	B-cell CLL/lymphoma 6	Homo sapiens
200920_s_at	B-cell translocation gene 1, anti-proliferative	Homo sapiens
201236_s_at	BTG family, member 2	Homo sapiens
204039_at	CCAAT/enhancer binding protein (C/EBP), alpha	Homo sapiens
227458_at, 223834_at	CD274 molecule	Homo sapiens
204420_at	FOS-like antigen 1	Homo sapiens
227376_at	GLI family zinc finger 3	Homo sapiens
244447_at	Kruppel-like factor 10	Homo sapiens
202364_at	MAX interactor 1	Homo sapiens
205398_s_at	SMAD family member 3	Homo sapiens
238987_at	UDP-Gal:betaGlcNAc beta 1,4- galactosyltransferase, polypeptide 1	Homo sapiens
205290_s_at, 205289_at	bone morphogenetic protein 2	Homo sapiens
211518_s_at	bone morphogenetic protein 4	Homo sapiens
206382_s_at	brain-derived neurotrophic factor	Homo sapiens
203989_x_at	coagulation factor II (thrombin) receptor	Homo sapiens
209112_at	cyclin-dependent kinase inhibitor 1B (p27, Kip1)	Homo sapiens
219534_x_at	cyclin-dependent kinase inhibitor 1C (p57, Kip2)	Homo sapiens
217127_at, 206085_s_at	cystathionase (cystathionine gamma-lyase)	Homo sapiens
205676_at	cytochrome P450, family 27, subfamily B, polypeptide 1	Homo sapiens
214079_at	dehydrogenase/reductase (SDR family) member 2	Homo sapiens
224822_at	deleted in liver cancer 1	Homo sapiens
205767_at, 1569583_at	epiregulin	Homo sapiens
214240_at	galanin prepropeptide	Homo sapiens
231771_at	gap junction protein, beta 6, 30kDa	Homo sapiens
204457_s_at	growth arrest-specific 1	Homo sapiens
203332_s_at	inositol polyphosphate-5-phosphatase, 145kDa	Homo sapiens
214022_s_at	interferon induced transmembrane protein 1 (9-27)	Homo sapiens
210118_s_at	interleukin 1, alpha	Homo sapiens
39402_at, 205067_at	interleukin 1, beta	Homo sapiens
242127_at, 244261_at	interleukin 28 receptor, alpha (interferon, lambda receptor)	Homo sapiens
205207_at	interleukin 6 (interferon, beta 2)	Homo sapiens
202859_x_at, 211506_s_at	interleukin 8	Homo sapiens
201466_s_at, 201465_s_at	jun oncogene	Homo sapiens
213240_s_at	keratin 4	Homo sapiens
203333_at	kinesin-associated protein 3	Homo sapiens
231798_at	noggin	Homo sapiens
201577_at	non-metastatic cells 1, protein (NM23A) expressed in; NME1-NME2 readthrough transcript; non-metastatic cells 2, protein (NM23B) expressed in	Homo sapiens
209230_s_at	nuclear protein, transcriptional regulator, 1	Homo sapiens
207740_s_at	nucleoporin 62kDa	Homo sapiens
211778_s_at	ovo-like 2 (Drosophila)	Homo sapiens
205646_s_at	paired box 6	Homo sapiens
209815_at	patched homolog 1 (Drosophila)	Homo sapiens
208510_s_at	peroxisome proliferator-activated receptor gamma	Homo sapiens
200658_s_at	prohibitin	Homo sapiens
1554997_a_at	prostaglandin-endoperoxide synthase 2 (prostaglandin G/H synthase and cyclooxygenase)	Homo sapiens
204566_at	protein phosphatase 1D magnesium-dependent, delta isoform	Homo sapiens
200635_s_at	protein tyrosine phosphatase, receptor type, F	Homo sapiens
218346_s_at	sestrin 1	Homo sapiens
209725_at	similar to Down-regulated in metastasis protein (Key-1A6 protein) (Novel nucleolar protein 73) (NNP73); UTP20, small subunit (SSU) processome component, homolog (yeast)	Homo sapiens
225639_at, 204362_at	src kinase associated phosphoprotein 2	Homo sapiens
235086_at	thrombospondin 1	Homo sapiens
225818_s_at	transforming growth factor beta regulator 1	Homo sapiens
209909_s_at, 228121_at, 220407_s_at	transforming growth factor, beta 2	Homo sapiens
200628_s_at	tryptophanyl-tRNA synthetase	Homo sapiens
1555355_a_at, 224833_at	v-ets erythroblastosis virus E26 oncogene homolog 1 (avian)	Homo sapiens

## Sheet: Table S1g
Table S1g. Differentially expressed genes related to apoptosis in the different time points in BPH1 cells.
ID	Gene Name	Species
227039_at	A kinase (PRKA) anchor protein 13	Homo sapiens
209406_at	BCL2-associated athanogene 2	Homo sapiens
226530_at	Bcl2 modifying factor	Homo sapiens
202887_s_at	DNA-damage-inducible transcript 4	Homo sapiens
227811_at	FYVE, RhoGEF and PH domain containing 3	Homo sapiens
239944_at	NLR family, apoptosis inhibitory protein	Homo sapiens
225816_at, 218517_at, 225820_at	PHD finger protein 17	Homo sapiens
205398_s_at	SMAD family member 3	Homo sapiens
202138_x_at, 209971_x_at	aminoacyl tRNA synthetase complex-interacting multifunctional protein 2; stromal antigen 3-like 3	Homo sapiens
1554417_s_at	anterior pharynx defective 1 homolog A (C. elegans)	Homo sapiens
204859_s_at	apoptotic peptidase activating factor 1	Homo sapiens
210334_x_at	baculoviral IAP repeat-containing 5	Homo sapiens
1557522_x_at, 1557521_a_at	bladder cancer associated protein	Homo sapiens
211368_s_at	caspase 1, apoptosis-related cysteine peptidase (interleukin 1, beta, convertase)	Homo sapiens
213596_at	caspase 4, apoptosis-related cysteine peptidase	Homo sapiens
213373_s_at	caspase 8, apoptosis-related cysteine peptidase	Homo sapiens
224414_s_at	caspase recruitment domain family, member 6	Homo sapiens
209031_at	cell adhesion molecule 1	Homo sapiens
203989_x_at	coagulation factor II (thrombin) receptor	Homo sapiens
220999_s_at	cytoplasmic FMR1 interacting protein 2	Homo sapiens
211255_x_at	death effector domain containing	Homo sapiens
203139_at	death-associated protein kinase 1	Homo sapiens
224822_at	deleted in liver cancer 1	Homo sapiens
214992_s_at	deoxyribonuclease II, lysosomal	Homo sapiens
222847_s_at, 219232_s_at	egl nine homolog 3 (C. elegans)	Homo sapiens
212374_at	fem-1 homolog b (C. elegans)	Homo sapiens
220102_at	forkhead box L2	Homo sapiens
210655_s_at	forkhead box O3; forkhead box O3B pseudogene	Homo sapiens
231771_at	gap junction protein, beta 6, 30kDa	Homo sapiens
226364_at	huntingtin interacting protein 1	Homo sapiens
203332_s_at	inositol polyphosphate-5-phosphatase, 145kDa	Homo sapiens
204415_at	interferon, alpha-inducible protein 6	Homo sapiens
210118_s_at	interleukin 1, alpha	Homo sapiens
39402_at, 205067_at	interleukin 1, beta	Homo sapiens
206569_at	interleukin 24	Homo sapiens
205207_at	interleukin 6 (interferon, beta 2)	Homo sapiens
222519_s_at	intraflagellar transport 57 homolog (Chlamydomonas)	Homo sapiens
201466_s_at, 201465_s_at	jun oncogene	Homo sapiens
209008_x_at	keratin 8 pseudogene 9; similar to keratin 8; keratin 8	Homo sapiens
206400_at	lectin, galactoside-binding, soluble, 7; lectin, galactoside-binding, soluble, 7B	Homo sapiens
214056_at, 241722_x_at	myeloid cell leukemia sequence 1 (BCL2-related)	Homo sapiens
242176_at	myocyte enhancer factor 2A	Homo sapiens
205220_at	niacin receptor 2; niacin receptor 1	Homo sapiens
201502_s_at	nuclear factor of kappa light polypeptide gene enhancer in B-cells inhibitor, alpha	Homo sapiens
230100_x_at	p21 protein (Cdc42/Rac)-activated kinase 1	Homo sapiens
200787_s_at	phosphoprotein enriched in astrocytes 15	Homo sapiens
217999_s_at, 217998_at, 225842_at, 217997_at	pleckstrin homology-like domain, family A, member 1	Homo sapiens
202731_at, 202730_s_at	programmed cell death 4 (neoplastic transformation inhibitor)	Homo sapiens
219275_at	programmed cell death 5	Homo sapiens
218849_s_at	protein phosphatase 1, regulatory (inhibitor) subunit 13 like	Homo sapiens
211085_s_at	serine/threonine kinase 4	Homo sapiens
AFFX-HUMISGF3A/M97935_MA_at, AFFX-HUMISGF3A/M97935_MB_at, 200887_s_at, 209969_s_at, 232375_at, AFFX-HUMISGF3A/M97935_3_at	signal transducer and activator of transcription 1, 91kDa	Homo sapiens
215329_s_at	similar to cell division cycle 2-like 1 (PITSLRE proteins); cell division cycle 2-like 1 (PITSLRE proteins); cell division cycle 2-like 2 (PITSLRE proteins)	Homo sapiens
212321_at	sphingosine-1-phosphate lyase 1	Homo sapiens
230398_at	tensin 4	Homo sapiens
235086_at	thrombospondin 1	Homo sapiens
201291_s_at	topoisomerase (DNA) II alpha 170kDa	Homo sapiens
223043_at	transmembrane protein 85	Homo sapiens
218145_at	tribbles homolog 3 (Drosophila)	Homo sapiens
1568592_at	tripartite motif-containing 69	Homo sapiens
202687_s_at	tumor necrosis factor (ligand) superfamily, member 10	Homo sapiens
206907_at	tumor necrosis factor (ligand) superfamily, member 9	Homo sapiens
204932_at, 204933_s_at	tumor necrosis factor receptor superfamily, member 11b	Homo sapiens
214581_x_at	tumor necrosis factor receptor superfamily, member 21	Homo sapiens
225912_at	tumor protein p53 inducible nuclear protein 1	Homo sapiens
209863_s_at, 211194_s_at	tumor protein p63	Homo sapiens
226213_at	v-erb-b2 erythroblastic leukemia viral oncogene homolog 3 (avian)	Homo sapiens
218807_at, 218806_s_at	vav 3 guanine nucleotide exchange factor	Homo sapiens

## Sheet:  Table S1h
Table S1h. Differentially expressed genes related to proliferation in the different time points in PrSF cells.
ID	Gene Name	Species
200862_at	24-dehydrocholesterol reductase	Homo sapiens
222162_s_at, 222486_s_at	ADAM metallopeptidase with thrombospondin type 1 motif, 1	Homo sapiens
203140_at, 215990_s_at	B-cell CLL/lymphoma 6	Homo sapiens
201236_s_at	BTG family, member 2	Homo sapiens
227458_at	CD274 molecule	Homo sapiens
209682_at, 227900_at	Cas-Br-M (murine) ecotropic retroviral transforming sequence b	Homo sapiens
228033_at	E2F transcription factor 7	Homo sapiens
218239_s_at, 218238_at	GTP binding protein 4	Homo sapiens
202393_s_at, 244447_at	Kruppel-like factor 10	Homo sapiens
218486_at	Kruppel-like factor 11	Homo sapiens
221841_s_at	Kruppel-like factor 4 (gut)	Homo sapiens
226231_at, 204005_s_at	PRKC, apoptosis, WT1, regulator	Homo sapiens
205398_s_at, 218284_at, 205397_x_at	SMAD family member 3	Homo sapiens
1566901_at, 203313_s_at	TGFB-induced factor homeobox 1	Homo sapiens
238987_at	UDP-Gal:betaGlcNAc beta 1,4- galactosyltransferase, polypeptide 1	Homo sapiens
202912_at	adrenomedullin	Homo sapiens
211518_s_at	bone morphogenetic protein 4	Homo sapiens
239367_at, 206382_s_at	brain-derived neurotrophic factor	Homo sapiens
203324_s_at, 203323_at	caveolin 2	Homo sapiens
238509_at	cullin 1	Homo sapiens
203078_at	cullin 2	Homo sapiens
227757_at	cullin 4A	Homo sapiens
202284_s_at	cyclin-dependent kinase inhibitor 1A (p21, Cip1)	Homo sapiens
209112_at	cyclin-dependent kinase inhibitor 1B (p27, Kip1)	Homo sapiens
213348_at, 213182_x_at, 219534_x_at	cyclin-dependent kinase inhibitor 1C (p57, Kip2)	Homo sapiens
210240_s_at	cyclin-dependent kinase inhibitor 2D (p19, inhibits CDK4)	Homo sapiens
210762_s_at, 224822_at	deleted in liver cancer 1	Homo sapiens
214285_at, 205738_s_at	fatty acid binding protein 3, muscle and heart (mammary-derived growth inhibitor)	Homo sapiens
204421_s_at	fibroblast growth factor 2 (basic)	Homo sapiens
201141_at	glycoprotein (transmembrane) nmb	Homo sapiens
204457_s_at	growth arrest-specific 1	Homo sapiens
203665_at	heme oxygenase (decycling) 1	Homo sapiens
212143_s_at, 210095_s_at	insulin-like growth factor binding protein 3	Homo sapiens
244261_at	interleukin 28 receptor, alpha (interferon, lambda receptor)	Homo sapiens
205207_at	interleukin 6 (interferon, beta 2)	Homo sapiens
211506_s_at, 202859_x_at	interleukin 8	Homo sapiens
203297_s_at, 203298_s_at	jumonji, AT rich interactive domain 2	Homo sapiens
201465_s_at, 201464_x_at, 201466_s_at	jun oncogene	Homo sapiens
217150_s_at, 204991_s_at	neurofibromin 2 (merlin)	Homo sapiens
209230_s_at	nuclear protein, transcriptional regulator, 1	Homo sapiens
210139_s_at	peripheral myelin protein 22	Homo sapiens
242218_at	peroxisome proliferator-activated receptor delta	Homo sapiens
208510_s_at	peroxisome proliferator-activated receptor gamma	Homo sapiens
215195_at	protein kinase C, alpha	Homo sapiens
206392_s_at, 221872_at, 206391_at	retinoic acid receptor responder (tazarotene induced) 1	Homo sapiens
205080_at	retinoic acid receptor, beta	Homo sapiens
218346_s_at	sestrin 1	Homo sapiens
209725_at	similar to Down-regulated in metastasis protein (Key-1A6 protein) (Novel nucleolar protein 73) (NNP73); UTP20, small subunit (SSU) processome component, homolog (yeast)	Homo sapiens
235591_at	somatostatin receptor 1	Homo sapiens
33323_r_at	stratifin	Homo sapiens
235086_at, 201109_s_at, 201110_s_at, 201108_s_at	thrombospondin 1	Homo sapiens
228121_at	transforming growth factor, beta 2	Homo sapiens
202241_at	tribbles homolog 1 (Drosophila)	Homo sapiens
1555355_a_at, 224833_at, 241435_at	v-ets erythroblastosis virus E26 oncogene homolog 1 (avian)	Homo sapiens

## Sheet: Table S1i
Table S1i. Differentially expressed genes related to apoptosis in the different time points in PrSF cells.
ID	Gene Name	Species
200862_at	24-dehydrocholesterol reductase	Homo sapiens
1557258_a_at, 205263_at, 1557257_at	B-cell CLL/lymphoma 10; hypothetical LOC646626	Homo sapiens
229720_at	BCL2-associated athanogene	Homo sapiens
225606_at	BCL2-like 11 (apoptosis facilitator)	Homo sapiens
223349_s_at	BCL2-related ovarian killer	Homo sapiens
201848_s_at	BCL2/adenovirus E1B 19kDa interacting protein 3	Homo sapiens
223518_at	DNA fragmentation factor, 45kDa, alpha polypeptide	Homo sapiens
202887_s_at	DNA-damage-inducible transcript 4	Homo sapiens
219551_at	ELL associated factor 2	Homo sapiens
219016_at	FAST kinase domains 5	Homo sapiens
240385_at, 210002_at	GATA binding protein 6	Homo sapiens
218486_at	Kruppel-like factor 11	Homo sapiens
223159_s_at	NIMA (never in mitosis gene a)-related kinase 6	Homo sapiens
235024_at	PHD finger protein 17	Homo sapiens
226231_at, 204005_s_at	PRKC, apoptosis, WT1, regulator	Homo sapiens
218501_at	Rho guanine nucleotide exchange factor (GEF) 3	Homo sapiens
205398_s_at, 218284_at, 205397_x_at	SMAD family member 3	Homo sapiens
1557458_s_at	Src homology 2 domain containing adaptor protein B	Homo sapiens
205611_at	TNFSF12-TNFSF13 readthrough transcript; tumor necrosis factor (ligand) superfamily, member 12; tumor necrosis factor (ligand) superfamily, member 13	Homo sapiens
208763_s_at	TSC22 domain family, member 3; GRAM domain containing 4	Homo sapiens
202138_x_at, 209971_x_at	aminoacyl tRNA synthetase complex-interacting multifunctional protein 2; stromal antigen 3-like 3	Homo sapiens
202820_at	aryl hydrocarbon receptor	Homo sapiens
222380_s_at	aryl-hydrocarbon receptor repressor; programmed cell death 6	Homo sapiens
204950_at, 1554479_a_at	caspase recruitment domain family, member 8	Homo sapiens
208792_s_at, 208791_at	clusterin	Homo sapiens
204363_at	coagulation factor III (thromboplastin, tissue factor)	Homo sapiens
238509_at	cullin 1	Homo sapiens
225557_at	cysteine-serine-rich nuclear protein 1	Homo sapiens
225042_s_at	cysteine-serine-rich nuclear protein 2	Homo sapiens
244546_at	cytochrome c, somatic	Homo sapiens
244803_at	death associated protein 3	Homo sapiens
210762_s_at, 224822_at	deleted in liver cancer 1	Homo sapiens
228929_at	deoxyribonuclease I	Homo sapiens
227828_s_at	family with sequence similarity 176, member A	Homo sapiens
204421_s_at	fibroblast growth factor 2 (basic)	Homo sapiens
200696_s_at	gelsolin (amyloidosis, Finnish type)	Homo sapiens
218469_at, 218468_s_at	gremlin 1, cysteine knot superfamily, homolog (Xenopus laevis)	Homo sapiens
203725_at	growth arrest and DNA-damage-inducible, alpha	Homo sapiens
209305_s_at, 207574_s_at, 209304_x_at	growth arrest and DNA-damage-inducible, beta	Homo sapiens
201631_s_at	immediate early response 3	Homo sapiens
205207_at	interleukin 6 (interferon, beta 2)	Homo sapiens
201465_s_at, 201464_x_at, 201466_s_at	jun oncogene	Homo sapiens
201596_x_at	keratin 18; keratin 18 pseudogene 26; keratin 18 pseudogene 19	Homo sapiens
229879_at	keratin 8 pseudogene 9; similar to keratin 8; keratin 8	Homo sapiens
200706_s_at, 200704_at	lipopolysaccharide-induced TNF factor	Homo sapiens
226770_at	membrane associated guanylate kinase, WW and PDZ domain containing 3	Homo sapiens
203837_at	mitogen-activated protein kinase kinase kinase 5	Homo sapiens
200798_x_at, 200797_s_at	myeloid cell leukemia sequence 1 (BCL2-related)	Homo sapiens
206814_at	nerve growth factor (beta polypeptide)	Homo sapiens
201502_s_at	nuclear factor of kappa light polypeptide gene enhancer in B-cells inhibitor, alpha	Homo sapiens
242218_at	peroxisome proliferator-activated receptor delta	Homo sapiens
217998_at, 225842_at, 217997_at, 217999_s_at	pleckstrin homology-like domain, family A, member 1	Homo sapiens
37028_at, 202014_at	protein phosphatase 1, regulatory (inhibitor) subunit 15A	Homo sapiens
212805_at	prune homolog 2 (Drosophila)	Homo sapiens
212099_at	ras homolog gene family, member B	Homo sapiens
201739_at	serum/glucocorticoid regulated kinase 1	Homo sapiens
33323_r_at	stratifin	Homo sapiens
235086_at, 201109_s_at, 201110_s_at, 201108_s_at	thrombospondin 1	Homo sapiens
218145_at	tribbles homolog 3 (Drosophila)	Homo sapiens
208178_x_at, 209011_at, 209013_x_at	triple functional domain (PTPRF interacting)	Homo sapiens
214329_x_at, 202687_s_at, 202688_at	tumor necrosis factor (ligand) superfamily, member 10	Homo sapiens
227345_at	tumor necrosis factor receptor superfamily, member 10d, decoy with truncated death domain	Homo sapiens
204933_s_at	tumor necrosis factor receptor superfamily, member 11b	Homo sapiens
218368_s_at	tumor necrosis factor receptor superfamily, member 12A	Homo sapiens
227812_at	tumor necrosis factor receptor superfamily, member 19	Homo sapiens
218856_at, 214581_x_at	tumor necrosis factor receptor superfamily, member 21	Homo sapiens
202644_s_at	tumor necrosis factor, alpha-induced protein 3	Homo sapiens
225912_at	tumor protein p53 inducible nuclear protein 1	Homo sapiens
226213_at	v-erb-b2 erythroblastic leukemia viral oncogene homolog 3 (avian)	Homo sapiens
202431_s_at	v-myc myelocytomatosis viral oncogene homolog (avian)	Homo sapiens

[truncated: 2 more sheets:  Table S1j, Table S1k]
