# Supplementary material for: Lipidosterolic Extract of Serenoa Repens Modulates the Expression of Inflammation Related-Genes in Benign Prostatic Hyperplasia Epithelial and Stromal Cells
Source: MDPI journal article supplement (doi:10.3390/ijms140714301), 2013-07-10
Supplement: s3 [file s3]

## Sheet: Table S2
Table S2. List of primers used.
Gene	Forward Primer	Reverse Primer
IL8	5'-CTCTTGGCAGCCTTCCTGATTT-3'	5'-TGGGGTGGAAAGGTTTGGAGTA-3'
IL1B	5'-GGATATGGAGCAACAAGTGG-3'	5'-ATGTACCAGTTGGGGAACTG-3'
IL1A	5'-ATCAGTACCTCACGGCTGCT-3'	5'-TGGGTATCTCAGGCATCTCC-3'
TFRC	5'-CTTTGGACATGCTCATCTGG-3'	5'-TGTTTTCCAGTCAGAGGGACA-3'
ALOX5	5'-TACATCGAGTTCCCCTGCTAC-3'	5'-GTTCTTTACGTCGGTGTTGCT-3'
CXCL6	5'-TGTTTACGCGTTACGCTGAG-3'	5'-AACTTGCTTCCCGTTCTTCA -3'
JUN	5'-AACGTGACAGATGAGCAGGA-3'	5'-GTTGCTGAGGTTTGCGTAGA-3'
GAS1	5'-CGCTGAGCCGCTACCTGA -3'	5'-CTTGGGCATAGCCAGCATGT -3'
CDKN1B	5'-GAAGAGTTAACCCGGGACTTG -3'	5'-AGTAGAACTCGGGCAAGCTG-3'
PHLDA1	5'-CCAGGACAGATGCTACTTGG -3'	5'-GACTACATAACCTAGCAGT-3'
NFkBIZ	5'-CATGGGAAATCCAATGAACAC-3'	5'-GGCAACAGCAATATGAAGGAA-3'
ERBB3	5'-ATGGTGCATAGAAACCTGGC-3 '	5'-ACTCCCAAACTGTCACACCA-3 '
PTGS2	5'-TGAAACCCACTCCAAACACA-3'	5'-GAGAAGGCTTCCCAGCTTTT-3'
IL6	5'-AGGAGACTTGCCTGGTGAAA-3 '	5'-CAGGGGTGGTTATTGCATCT-3 '
IL1R1	5'-AGAGGAAAACAAACCCACAAGG-3	5'-CTGGCCGGTGACATTACAGAT-3'
DEDD	5'-CCAGCCCTCTAAAACAGTGC-3'	5'-TCTCCTTGGGATCTGGTGTC-3'
NFKB1	5'-GCAGAGGAAACGTCAGAAGC-3'	5'-CATGCTTCATCCCAGCATTA-3'
TBP	5'-AGTGAAGAACAGTCCAGACTG-3'	5'-CCAGGAAATAACTCTGGCTCAT-3'
