# Supplementary material for: Lipidosterolic Extract of Serenoa Repens Modulates the Expression of Inflammation Related-Genes in Benign Prostatic Hyperplasia Epithelial and Stromal Cells
Source: Int J Mol Sci. 2013 Jul 10;14(7):14301–20. doi: 10.3390/ijms140714301 (PMC3742245; doi:10.3390/ijms140714301)

# Supplementary Information

**Figure S1.** Heat maps of significantly differentially expressed genes involved in proliferation (left) and apoptosis (right) GO terms in BPH1 cells (a) and PrSF cells (b) treated by LSESr at different time-points as compared to control.

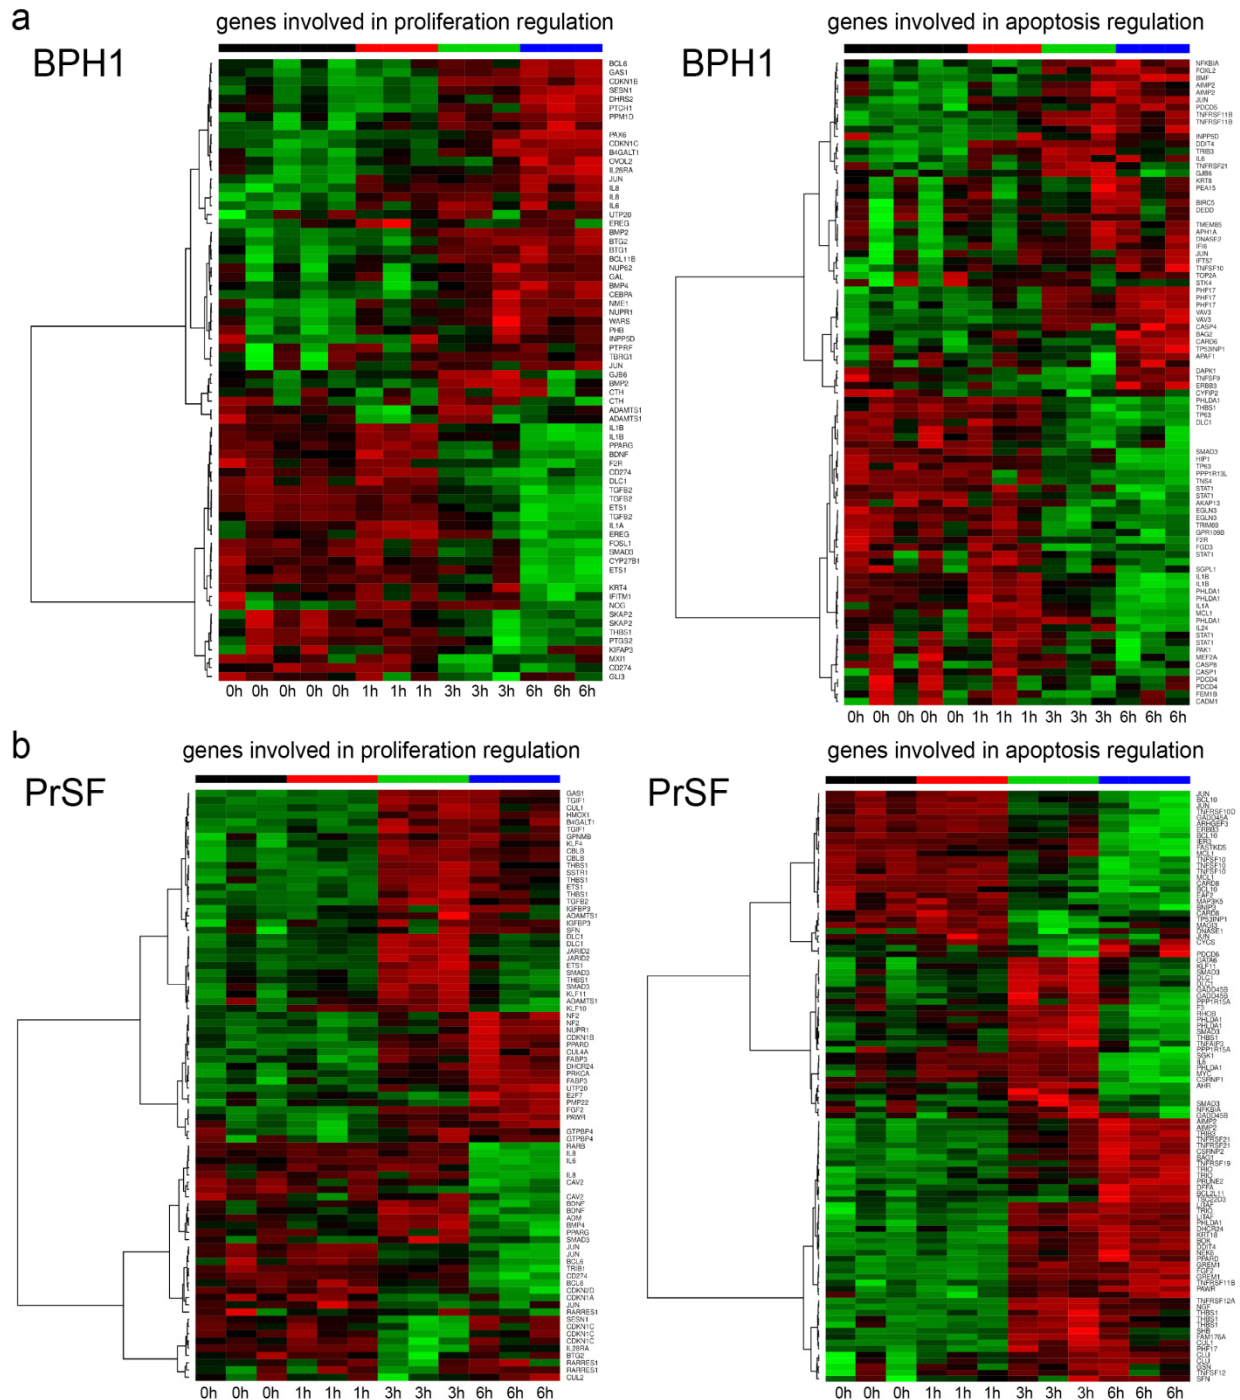

Supplement: Supplementary file 1 [file ijms-14-14301-s001.pdf]
